# Supplementary material for: The Relative Importance of Innate Immune Priming in Wolbachia-Mediated Dengue Interference
Source: PLoS Pathog. 2012 Feb 23;8(2):e1002548. doi: 10.1371/journal.ppat.1002548 (PMC3285598; doi:10.1371/journal.ppat.1002548)
Supplement: Table S2 — Aedes aegypti transcriptional responses to wMelPop-CLA infection. Transcripts are ranked by the magnitude of Absolute Fold Change (AFC). Transcript identifiers (Transcript ID) and Description were compiled from Vectorbase. Drosophila melanogaster Gene Identifier (Dm Gene ID) and Symbol were compiled from Flybase. (XLS) [file ppat.1002548.s004.xls]

## Sheet: wMelPop_input.corrected.txt
Table S2. A. aegypti transcriptional responses to wMelPop-CLA infection.
Transcript ID	AFC	q-value	Description	Dm Gene ID	Dm symbol
AAEL000611-RA	125.521	9.63e-06	Cecropin, Anti-Microbial Peptide. [Source:Aedes_ManualAnnotation;Acc:AAEL800422]	no homolog
AAEL010137-RA	73.9486	4.25e-05	ketoreductase, putative	no homolog
AAEL003832-RA	70.7566	7.09e-06	Defensin-C Precursor [Source:UniProt/SWISSPROT;Acc:P81603]	FBgn0010385	Def
AAEL015515-RA	69.3141	1.14e-05	Cecropin, Anti-Microbial Peptide. [Source:Aedes_ManualAnnotation;Acc:AAEL800424]	no homolog
AAEL003843-RA	56.9168	0.000415132	hypothetical protein	no homolog
AAEL015458-RA	55.3789	7.09e-06	transferrin	FBgn0022355	Tsf1
AAEL000625-RA	53.8284	3.65e-05	Cecropin, Anti-Microbial Peptide. [Source:Aedes_ManualAnnotation;Acc:AAEL800423]	no homolog
AAEL008050-RA	52.073	0.000118231	hypothetical protein	no homolog
AAEL000621-RA	47.3119	1.14e-05	Cecropin, Anti-Microbial Peptide. [Source:Aedes_ManualAnnotation;Acc:AAEL800428]	no homolog
AAEL000627-RA	46.0218	7.09e-06	Cecropin-A Precursor [Source:UniProt/SWISSPROT;Acc:P82592]	no homolog
AAEL011763-RA	45.8707	3.95e-05	Prophenoloxidase [Source:Aedes_ManualAnnotation;Acc:AAEL800571]	FBgn0000165
AAEL006111-RB	44.2638	0.000430539	hypothetical protein	no homolog
AAEL010919-RA	39.191	3.3e-05	prophenoloxidase	FBgn0000165
AAEL014837-RA	34.153	4.62e-05	Prophenoloxidase [Source:Aedes_ManualAnnotation;Acc:AAEL800577]	FBgn0000165
AAEL006877-RA	34.0333	3.62e-05	prophenoloxidase	FBgn0000165
AAEL011764-RA	33.7038	1.88e-05	Prophenoloxidase [Source:Aedes_ManualAnnotation;Acc:AAEL800578]	FBgn0000165
AAEL013501-RA	32.8453	2.53e-05	Prophenoloxidase [Source:Aedes_ManualAnnotation;Acc:AAEL800572]	FBgn0000165
AAEL005641-RA	31.4736	3.97e-05	C-Type Lectin (CTL) - galactose binding. [Source:Aedes_ManualAnnotation;Acc:AAEL800461]	no homolog
AAEL008156-RA	25.1152	4.9e-05	conserved hypothetical protein	FBgn0042103	CG18746
AAEL005431-RA	22.6587	1.85e-05	Clip-Domain Serine Protease, family B. [Source:Aedes_ManualAnnotation;Acc:AAEL800832]	no homolog
AAEL009746-RA	22.5328	2.16e-05	hypothetical protein	no homolog
AAEL003699-RA	21.921	7.43e-05	conserved hypothetical protein	no homolog
AAEL012353-RA	18.79	2.27e-05	C-Type Lectin (CTL). [Source:Aedes_ManualAnnotation;Acc:AAEL800446]	no homolog
AAEL008646-RA	17.6453	0.000183916	fibrinogen and fibronectin	FBgn0035452	CG10359
AAEL011634-RA	17.3484	0.000424835	fibrinogen and fibronectin	no homolog
AAEL001084-RA	16.3928	7.09e-06	Clip-Domain Serine Protease, family B. Protease homologue. [Source:Aedes_ManualAnnotation;Acc:AAEL800816]	no homolog
AAEL013284-RA	16.0808	0.00026319	serine-type enodpeptidase,	FBgn0036264	CG11529
AAEL000374-RA	15.2985	3.1e-05	cysteine-rich venom protein, putative	no homolog
AAEL014565-RA	14.9589	0.000118231	hypothetical protein	no homolog
AAEL009927-RA	14.6376	0.00062014	conserved hypothetical protein	FBgn0031538	CG3246
AAEL009459-RA	14.555	1.14e-05	hypothetical protein	no homolog
AAEL003294-RA	14.4969	0.000166715	fibrinogen and fibronectin	no homolog
AAEL004923-RA	14.3752	9e-05	nicotinic acetylcholine receptor, putative	no homolog
AAEL008935-RA	13.5434	9.67e-05	hypothetical protein	FBgn0025643	CG3588
AAEL008817-RA	13.4998	0.000558075	hexamerin 2 beta	FBgn0002565	Lsp2
AAEL012194-RA	13.0845	4.25e-05	cysteine-rich venom protein, putative	no homolog
AAEL003442-RA	12.765	2.59e-05	conserved hypothetical protein	no homolog
AAEL003029-RA	12.3951	4.6e-05	hypothetical protein	no homolog
AAEL006971-RA	12.1002	0.000101552	conserved hypothetical protein	no homolog
AAEL005093-RA	11.578	3.13e-05	Clip-Domain Serine Protease, family B. [Source:Aedes_ManualAnnotation;Acc:AAEL800841]	no homolog
AAEL014382-RA	11.169	3.1e-05	C-Type Lectin (CTL) - mannose binding. [Source:Aedes_ManualAnnotation;Acc:AAEL800471]	no homolog
AAEL002467-RA	11.1164	1.14e-05	conserved hypothetical protein	FBgn0036947	obst-F
AAEL006361-RA	10.8936	0.000465953	Class C Scavenger Receptor (Sushi/SCR/CCP, MAM, and Somatomedin B domains). [Source:Aedes_ManualAnnotation;Acc:AAEL800205]	FBgn0020377	Sr-CII
AAEL011607-RA	10.5429	4.65e-05		no_info
AAEL008473-RA	10.5253	3.35e-05	cysteine-rich venom protein, putative	FBgn0031412	CG16995
AAEL000598-RA	10.4376	0.000183319	Cecropin, Anti-Microbial Peptide. [Source:Aedes_ManualAnnotation;Acc:AAEL800421]	no homolog
AAEL002580-RA	10.4172	7.5e-05	predicted protein	no homolog
AAEL001392-RA	10.1702	0.000537734	hypothetical protein	no homolog
AAEL004022-RA	10.0399	0.000161073		FBgn0031327	CG5397
AAEL002492-RA	9.94101	9.63e-06	hypothetical protein	no homolog
AAEL007993-RA	9.33416	7.09e-06	Clip-Domain Serine Protease, family B. [Source:Aedes_ManualAnnotation;Acc:AAEL800822]	FBgn0039494	grass
AAEL003619-RA	9.22159	1.54e-05	sodium/chloride dependent amino acid transporter	no homolog
AAEL008180-RA	9.0519	0.000312876	conserved hypothetical protein	FBgn0042102	CG18745
AAEL008936-RA	8.99685	7.09e-06	hypothetical protein	FBgn0025643	CG3588
AAEL003448-RA	8.761	0.00158801	GPCR Orphan/Putative Class A Family [Source:Aedes_ManualAnnotation;Acc:AAEL800741]	FBgn0034996	CG13575
AAEL012086-RA	8.64356	2.59e-05	hypothetical protein	no homolog
AAEL004667-RA	8.59223	7.09e-06	conserved hypothetical protein	no homolog
AAEL002520-RA	8.58797	0.000102666	apolipoprotein D, putative	FBgn0030334	Karl
AAEL008173-RA	8.58212	0.000320291	conserved hypothetical protein	FBgn0042104	CG18747
AAEL001794-RB	8.43749	5.16e-05	macroglobulin/complement	no homolog
AAEL003642-RA	8.28612	7.09e-06	serine protease	FBgn0037515	Sp7
AAEL012554-RA	8.16646	0.000401993	maltose phosphorylase	FBgn0032387	CG16965
AAEL002585-RA	8.05118	2.19e-05	serine protease	FBgn0028864	CG18477
AAEL004935-RA	7.99639	0.000910592	nicotinic acetylcholine receptor, beta-2 subunit, putative	no homolog
AAEL001508-RA	7.74004	1.77e-05	conserved hypothetical protein	no homolog
AAEL008805-RA	7.73832	0.00122072	conserved hypothetical protein	no homolog
AAEL013885-RA	7.66569	2.27e-05	conserved hypothetical protein	FBgn0030929	CG15043
AAEL002524-RA	7.37552	0.000120166	C-Type Lectin (CTL). [Source:Aedes_ManualAnnotation;Acc:AAEL800455]	no homolog
AAEL012506-RA	7.32296	0.000585567	conserved hypothetical protein	FBgn0029084	gom
AAEL002601-RA	7.31353	6.12e-05	Clip-Domain Serine Protease, family A. Protease homologue. [Source:Aedes_ManualAnnotation;Acc:AAEL800800]	FBgn0033321	CG8738
AAEL009985-RA	7.28232	2.59e-05	conserved hypothetical protein	FBgn0030929	CG15043
AAEL013245-RA	7.22996	7.09e-06	Clip-Domain Serine Protease, family B. [Source:Aedes_ManualAnnotation;Acc:AAEL800823]	FBgn0039494	grass
AAEL007344-RA	7.22403	1.54e-05	conserved hypothetical protein	FBgn0034758	CG13510
AAEL000662-RA	7.18436	0.000638999	conserved hypothetical protein	FBgn0025686	CG11592
AAEL002610-RA	6.92992	1.14e-05	serine protease	FBgn0032638	CG6639
AAEL009474-RA	6.75919	5.1e-05	Peptidoglycan Recognition Protein (Short) [Source:Aedes_ManualAnnotation;Acc:AAEL800183]	FBgn0030310	PGRP-SA
AAEL014349-RA	6.74229	7.09e-06	Clip-Domain Serine Protease, family B. [Source:Aedes_ManualAnnotation;Acc:AAEL800813]	no homolog
AAEL013417-RA	6.70739	6.18e-05	fibrinogen and fibronectin	no homolog
AAEL002624-RA	6.65315	3.16e-05	serine protease	FBgn0028514	CG4793
AAEL015290-RA	6.61064	0.000906572	hypothetical protein	no homolog
AAEL009536-RA	6.58638	0.000490636	hypothetical protein	FBgn0060296	pain
AAEL006662-RA	6.57898	6.33e-05	hypothetical protein	no homolog
AAEL002920-RA	6.53184	0.000134072	hypothetical protein	no homolog
AAEL005154-RA	6.49893	0.000491523	hypothetical protein	no homolog
AAEL000859-RA	6.34219	4.41e-05	hypothetical protein	FBgn0054040	CG34040
AAEL004389-RA	6.25933	0.000263579	mannosidase alpha class 2a	FBgn0026616	alpha-Man-IIb
AAEL008757-RA	6.16185	2.51e-05		FBgn0032132	CG4382
AAEL007992-RA	6.1298	4.37e-05	trypsin, putative	FBgn0039494	grass
AAEL002295-RA	6.04666	2.27e-05	leucine-rich transmembrane protein	FBgn0032235	CG5096
AAEL003723-RA	6.04201	0.000396554	C-Type Lysozyme (Lys-A). [Source:Aedes_ManualAnnotation;Acc:AAEL800177]	no homolog
AAEL010099-RA	6.01633	3.66e-05	4-nitrophenylphosphatase	FBgn0030347	CG15739
AAEL002549-RA	5.95741	0.00268014	conserved hypothetical protein	FBgn0039232	CG13636
AAEL008532-RA	5.91358	0.000428038		no homolog
AAEL011621-RA	5.84174	0.000249711	C-Type Lectin (CTL) - mannose binding. [Source:Aedes_ManualAnnotation;Acc:AAEL800470]	no homolog
AAEL006355-RA	5.81191	0.00043165	Class C Scavenger Receptor (Sushi/SCR/CCP, MAM, and Somatomedin B domains). [Source:Aedes_ManualAnnotation;Acc:AAEL800204]	FBgn0014033	Sr-CI
AAEL005792-RA	5.77917	2.74e-05	Clip-Domain Serine Protease, family E. Protease homologue. [Source:Aedes_ManualAnnotation;Acc:AAEL800564]	no homolog
AAEL001401-RA	5.76082	0.0011287	conserved hypothetical protein	no homolog
AAEL008452-RA	5.7432	9.07e-05	alpha-amylase	FBgn0000079	Amy-p
AAEL001271-RA	5.73243	6.12e-05	conserved hypothetical protein	no homolog
AAEL009737-RA	5.72483	0.00073678	conserved hypothetical protein	FBgn0031783	tectonic
AAEL000271-RB	5.68283	2.26e-05	gamma-glutamyl hydrolase, putative	FBgn0052155	CG32155
AAEL008106-RA	5.65616	3.1e-05	hypothetical protein	FBgn0034011	CG8160
AAEL005769-RA	5.58229	0.000581452	glucose dehydrogenase	FBgn0001112	Gld
AAEL008259-RA	5.53813	3.1e-05	conserved hypothetical protein	no homolog
AAEL008283-RA	5.49538	0.00024647	conserved hypothetical protein	no homolog
AAEL010779-RA	5.45887	0.000552024	pickpocket	FBgn0065108	ppk16
AAEL010393-RA	5.44644	0.00132513	ferritin subunit, putative	FBgn0015222	Fer1HCH
AAEL005316-RA	5.44394	0.000554835	conserved hypothetical protein	FBgn0036780	CG7330
AAEL013774-RA	5.41894	4.95e-05	conserved hypothetical protein	no homolog
AAEL007371-RA	5.35246	3.53e-05	hypothetical protein	no homolog
AAEL014541-RA	5.35144	7.09e-06	maltose phosphorylase	FBgn0032387	CG16965
AAEL000012-RA	5.31206	0.000141138	AaGr6 [Source:Aedes_ManualAnnotation;Acc:AAEL800860]	FBgn0035167	Gr61a
AAEL005770-RA	5.27335	3.16e-05	odorant-binding protein 99c, putative	FBgn0033268	Obp44a
AAEL002686-RA	5.25395	0.000120215	testisin precursor, putative	no homolog
AAEL001802-RA	5.24385	9.45e-05	macroglobulin/complement	no homolog
AAEL001892-RC	5.23993	0.000339117	conserved hypothetical protein	no homolog
AAEL001892-RA	5.20606	0.000355888	conserved hypothetical protein	no homolog
AAEL000306-RA	5.18569	0.00430594	conserved hypothetical protein	no homolog
AAEL006673-RA	5.15267	0.00102519	hypothetical protein	FBgn0039234	nct
AAEL002022-RA	5.14776	0.000340313	protein serine/threonine kinase, putative	FBgn0011695	PebIII
AAEL011611-RA	5.14467	0.00131245		no_info
AAEL005432-RB	5.09029	2.08e-05	conserved hypothetical protein	FBgn0051004	CG31004
AAEL007967-RA	5.04848	0.00023124	conserved hypothetical protein	FBgn0028545
AAEL007109-RA	5.02202	0.000188529	hypothetical protein	no homolog
AAEL001098-RA	5.0152	6.49e-05	clip-domain serine protease, putative	no homolog
AAEL002589-RA	4.9882	0.00227906	conserved hypothetical protein	no homolog
AAEL000009-RA	4.94969	0.000896186	hypothetical protein	no homolog
AAEL008799-RA	4.9211	0.000340313	hypothetical protein	no homolog
AAEL002702-RA	4.91395	3.13e-05	hypothetical protein	no homolog
AAEL000626-RA	4.86749	0.000295169	hypothetical protein	no homolog
AAEL006136-RA	4.83531	3.3e-05	serine protease, putative	FBgn0038211	CG9649
AAEL007644-RA	4.8256	8.1e-05	GPCR Orphan/Putative Class A Family [Source:Aedes_ManualAnnotation;Acc:AAEL800734]	no homolog
AAEL003483-RA	4.81422	1.54e-05	conserved hypothetical protein	no homolog
AAEL011411-RA	4.75688	0.000115673	sugar transporter	no homolog
AAEL003656-RA	4.70294	0.000816884	hypothetical protein	no homolog
AAEL009795-RA	4.69514	3.3e-05	papilin	FBgn0003137	Ppn
AAEL003803-RA	4.69465	0.000222228	conserved hypothetical protein	no homolog
AAEL000968-RA	4.69115	0.0029437	hypothetical protein	no homolog
AAEL006671-RA	4.6181	0.000534794	hypothetical protein	FBgn0039234	nct
AAEL007693-RA	4.56992	7.09e-06	organic anion transporter	FBgn0032435	Oatp33Eb
AAEL005432-RA	4.56664	2.89e-05	conserved hypothetical protein	FBgn0051004	CG31004
AAEL011144-RA	4.55734	9.5e-05	triacylglycerol lipase, pancreatic	FBgn0029831	CG5966
AAEL009476-RA	4.55531	3.1e-05	hypothetical protein	no homolog
AAEL008668-RA	4.53318	6.51e-05	Clip-Domain Serine Protease, family B. [Source:Aedes_ManualAnnotation;Acc:AAEL800817]	no homolog
AAEL006168-RA	4.52395	6.73e-05	Clip-Domain Serine Protease, family B. [Source:Aedes_ManualAnnotation;Acc:AAEL800837]	no homolog
AAEL014937-RA	4.51631	2.59e-05	hypothetical protein	no homolog
AAEL002447-RA	4.50861	0.000120052	hypothetical protein	no homolog
AAEL012647-RA	4.49613	0.00107709	conserved hypothetical protein	no homolog
AAEL003645-RA	4.48668	3.13e-05	stearoyl-coa desaturase	FBgn0039756	CG9743
AAEL014945-RB	4.45144	0.000581452	conserved hypothetical protein	FBgn0038704	CG5316
AAEL001964-RA	4.4491	6.57e-05	protein serine/threonine kinase, putative	FBgn0011695	PebIII
AAEL010396-RA	4.44575	0.000167823	secreted ferritin G subunit precursor, putative	FBgn0015221	Fer2LCH
AAEL007769-RA	4.4322	0.00589142	hypothetical protein	no homolog
AAEL015647-RA	4.42506	0.00400369	conserved hypothetical protein	FBgn0039879	Ir100a
AAEL009616-RA	4.40566	0.00140042	cadherin	FBgn0036715	Cad74A
AAEL007455-RA	4.40089	0.00688089	thrombospondin	no homolog
AAEL003816-RB	4.38034	9.23e-05	hypothetical protein	no homolog
AAEL003816-RA	4.36772	0.000112591	hypothetical protein	no homolog
AAEL007778-RA	4.33401	1.48e-05	leucine-rich transmembrane protein	FBgn0036587	CG4950
AAEL003156-RA	4.33125	0.000266156	fibrinogen and fibronectin	no homolog
AAEL014551-RA	4.32293	0.00056657	triacylglycerol lipase, pancreatic	FBgn0029831	CG5966
AAEL011551-RA	4.30951	3.41e-05	conserved hypothetical protein	FBgn0035094	CG9380
AAEL001882-RA	4.3019	2.27e-05	conserved hypothetical protein	no homolog
AAEL010867-RA	4.26778	0.000114865	serine protease	FBgn0003450	snk
AAEL005812-RA	4.26674	3.1e-05	conserved hypothetical protein	no homolog
AAEL000099-RA	4.26218	2.27e-05	Clip-Domain Serine Protease, family B. [Source:Aedes_ManualAnnotation;Acc:AAEL800828]	no homolog
AAEL006233-RB	4.26042	0.00152681	hypothetical protein	no homolog
AAEL013775-RA	4.24814	0.000141103	conserved hypothetical protein	no homolog
AAEL000044-RB	4.21259	7.33e-05	ornithine decarboxylase	FBgn0013308	Odc2
AAEL000213-RA	4.21203	3.1e-05	d-amino acid oxidase	FBgn0031860	CG11236
AAEL007967-RB	4.18767	0.000332985	conserved hypothetical protein	FBgn0028545
AAEL002661-RA	4.18578	0.000770177	matrix metalloproteinase	no homolog
AAEL005883-RA	4.17615	0.000353084	hypothetical protein	no homolog
AAEL003737-RA	4.16717	1.85e-05	conserved hypothetical protein	no homolog
AAEL011453-RA	4.14704	3.79e-05	C-Type Lectin (CTL). [Source:Aedes_ManualAnnotation;Acc:AAEL800445]	FBgn0053533	lectin-37Db
AAEL003886-RA	4.12371	0.000111369	conserved hypothetical protein	FBgn0037517	CG10086
AAEL009537-RA	4.10954	0.00249041	hypothetical protein	no homolog
AAEL004278-RA	4.0975	0.000101842	conserved hypothetical protein	FBgn0000406	Cyt-b5-r
AAEL000837-RA	4.0718	0.00149482	conserved hypothetical protein	no homolog
AAEL008620-RA	4.04725	3.16e-05	D7 protein, putative	no homolog
AAEL003712-RA	4.04638	8.67e-05	C-Type Lysozyme (Lys-E). [Source:Aedes_ManualAnnotation;Acc:AAEL800176]	no homolog
AAEL012646-RA	4.04484	0.00210829	conserved hypothetical protein	no homolog
AAEL007703-RA	4.01606	0.0015526	conserved hypothetical protein	no homolog
AAEL009844-RA	4.0119	4.92e-05	conserved hypothetical protein	no homolog
AAEL005293-RA	4.01175	7.09e-06	Galectin. [Source:Aedes_ManualAnnotation;Acc:AAEL800154]	no homolog
AAEL002767-RA	4.00123	3.98e-05	conserved hypothetical protein	FBgn0033880	CG6553
AAEL012644-RA	3.96607	0.00554602	conserved hypothetical protein	no homolog
AAEL003842-RA	3.93994	6.12e-05	hypothetical protein	no homolog
AAEL012001-RA	3.93141	2.27e-05	Galectin. [Source:Aedes_ManualAnnotation;Acc:AAEL800154]	no homolog
AAEL002578-RA	3.9204	1.14e-05	conserved hypothetical protein	FBgn0036945	CG6981
AAEL013984-RA	3.90253	3.35e-05	conserved hypothetical protein	FBgn0035612	CG10625
AAEL010329-RA	3.88026	0.00619462	conserved hypothetical protein	no homolog
AAEL007103-RA	3.86877	7.89e-05	p37NB protein, putative	FBgn0036587	CG4950
AAEL003967-RA	3.86863	3.35e-05	calpain 4, 6, 7, invertebrate	FBgn0012051	CalpA
AAEL009520-RA	3.86446	3.1e-05	hypothetical protein	FBgn0039332	CG11910
AAEL010547-RA	3.85206	0.000234676	hypothetical protein	no homolog
AAEL002242-RA	3.84954	0.000290976	conserved hypothetical protein	FBgn0031974	CG12560
AAEL002301-RA	3.84777	2.75e-05	serine protease	no homolog
AAEL009244-RA	3.84264	1.14e-05	serine-type enodpeptidase,	FBgn0011834	Ser6
AAEL006575-RC	3.83565	0.000679525	troponin C	FBgn0033027	TpnC4
AAEL012956-RA	3.80685	0.0001112	elastase, putative	no homolog
AAEL014658-RA	3.80392	0.000276272	caspase-1	no homolog
AAEL015595-RA	3.79902	0.00535535	conserved hypothetical protein	FBgn0000083	AnnIX
AAEL012646-RB	3.79589	0.0016015	conserved hypothetical protein	no homolog
AAEL003280-RA	3.78955	0.000235729		no_info
AAEL004409-RA	3.74588	0.000150585	yellow protein, putative	no homolog
AAEL009178-RA	3.72302	0.000897618	Gram-Negative Binding Protein (GNBP), or Beta-1,3-Glucan Binding Protein (BGBP). [Source:Aedes_ManualAnnotation;Acc:AAEL800163]	FBgn0040323	GNBP1
AAEL009974-RA	3.71907	0.000137081	ras-related protein Rab-8A, putative	FBgn0051118	RabX4
AAEL010917-RA	3.71575	0.0010555	organic anion transporter	no homolog
AAEL012698-RA	3.71436	1.14e-05	ATP-binding cassette sub-family A member 3, putative	FBgn0031170	CG1718
AAEL005428-RA	3.70871	1.33e-05	conserved hypothetical protein	FBgn0053998	CG33998
AAEL007040-RA	3.67397	0.00318532	lozenge	FBgn0002576	lz
AAEL015362-RA	3.66218	0.00097264	cytochrome P450	FBgn0038076	Cyp313a4
AAEL010773-RA	3.64309	4.41e-05	Clip-Domain Serine Protease, family E. Protease homologue. [Source:Aedes_ManualAnnotation;Acc:AAEL800566]	no homolog
AAEL002490-RA	3.64014	0.000363883	conserved hypothetical protein	FBgn0036947	obst-F
AAEL008658-RA	3.63562	0.00011103	conserved hypothetical protein	FBgn0036587	CG4950
AAEL013517-RA	3.61931	0.000637051	pupal cuticle protein 78E, putative	FBgn0042119	Cpr65Au
AAEL012635-RA	3.60661	2.91e-05	conserved hypothetical protein	no homolog
AAEL009626-RA	3.59924	0.000401993	ankyrin repeat domain protein	no homolog
AAEL005482-RA	3.5878	0.000222228	C-Type Lectin (CTL). [Source:Aedes_ManualAnnotation;Acc:AAEL800449]	FBgn0016675	Lectin-galC1
AAEL011863-RA	3.57289	5.04e-05	ABC transporter	FBgn0052091	CG32091
AAEL000507-RA	3.57197	5.25e-05	conserved hypothetical protein	no homolog
AAEL005295-RA	3.57116	0.00125963	hypothetical protein	no homolog
AAEL003505-RA	3.57091	5.43e-05	jun	FBgn0001291	Jra
AAEL001892-RB	3.56865	0.000292354	conserved hypothetical protein	no homolog
AAEL000447-RA	3.54955	0.00018559	V-1 protein, putative	no homolog
AAEL006434-RA	3.53471	4.42e-05	serine protease, putative	no homolog
AAEL010180-RA	3.53418	0.000890958	conserved hypothetical protein	no homolog
AAEL002263-RA	3.53031	3.1e-05	conserved hypothetical protein	FBgn0033789	CG13324
AAEL002730-RA	3.52493	2.16e-05	Serine Protease Inhibitor (serpin), likely cleavage at R/V. [Source:Aedes_ManualAnnotation;Acc:AAEL800223]	no homolog
AAEL009155-RA	3.51854	5.17e-05	conserved hypothetical protein	no homolog
AAEL008097-RA	3.51664	0.000343082	trypsin-eta, putative	FBgn0029827	CG6048
AAEL001667-RA	3.5049	0.000343082	multicopper oxidase	no homolog
AAEL002263-RB	3.50479	2.75e-05	conserved hypothetical protein	FBgn0033789	CG13324
AAEL013032-RA	3.49973	0.000265579	conserved hypothetical protein	no homolog
AAEL002582-RA	3.47144	8.07e-05	coagulation factor X, putative	FBgn0033320	CG8586
AAEL011942-RA	3.46021	4.16e-05	zinc finger protein	no homolog
AAEL014909-RA	3.45929	2.16e-05	conserved hypothetical protein	FBgn0037779	CG12811
AAEL007060-RA	3.45736	0.000456662	lipase	FBgn0039471	CG6295
AAEL002582-RB	3.4557	8.67e-05	coagulation factor X, putative	FBgn0033320	CG8586
AAEL000957-RA	3.45231	2.35e-05	hypothetical protein	no homolog
AAEL001555-RA	3.44407	0.0024068	conserved hypothetical protein	no homolog
AAEL007624-RA	3.44352	0.00014324	IMD pathway signalling, NF-kappaB Relish-like transcription factor. [Source:Aedes_ManualAnnotation;Acc:AAEL800491]	FBgn0014018	Rel
AAEL006708-RA	3.43679	0.000201837	hedgehog	FBgn0004644	hh
AAEL007534-RA	3.43338	8.16e-05	conserved hypothetical protein	FBgn0043806	CG32032
AAEL002643-RA	3.42203	0.00303576	conserved hypothetical protein	no homolog
AAEL005358-RB	3.40971	0.00173205	conserved hypothetical protein	FBgn0022987	qkr54B
AAEL000863-RA	3.40944	0.000920267	SPASIC protein, putative	no homolog
AAEL002615-RA	3.4071	7.09e-06	leucine-rich transmembrane protein	FBgn0035043	CG4781
AAEL014386-RA	3.36771	0.000167823	clip-domain serine protease, putative	no homolog
AAEL006798-RA	3.36561	6.73e-05	cytochrome P450 [Source:Aedes_ManualAnnotation;Acc:AAEL800361]	no homolog
AAEL003066-RA	3.34845	9.45e-05	brain chitinase and chia	FBgn0034580	Cht8
AAEL005412-RA	3.33733	0.000107363	annexin x	FBgn0000084	AnnX
AAEL001261-RA	3.32409	0.000215935	hypothetical protein	no homolog
AAEL013262-RA	3.32292	0.000317	conserved hypothetical protein	no homolog
AAEL004120-RA	3.32117	3.66e-05	Niemann-Pick Type C-2, putative	FBgn0039800	Npc2g
AAEL006975-RA	3.31602	0.00188546	leucine aminopeptidase	FBgn0033868	CG13340
AAEL004863-RA	3.31236	9e-05	conserved hypothetical protein	FBgn0041712	yellow-d
AAEL015200-RA	3.30427	0.00219554	conserved hypothetical protein	FBgn0039905	CG2052
AAEL004778-RA	3.30282	0.000273226	acyl-coa dehydrogenase	FBgn0034432	CG7461
AAEL009561-RA	3.29699	0.0001438	apolipoprotein D, putative	no homolog
AAEL011564-RB	3.29496	0.000697795	choline-phosphate cytidylyltransferase a, b	FBgn0035231	Cct2
AAEL009359-RA	3.2853	0.00020246	conserved hypothetical protein	no homolog
AAEL002848-RA	3.27772	0.00052335	tubulin beta chain	FBgn0003888	betaTub60D
AAEL001293-RA	3.27355	8.83e-05	conserved hypothetical protein	FBgn0031913	CG5958
AAEL003311-RA	3.27209	0.0010825	conserved hypothetical protein	no homolog
AAEL013124-RA	3.26799	5.66e-05	GTP-binding protein alpha subunit, gna	FBgn0010223	Galpha73B
AAEL011884-RA	3.26322	0.000171741	hypothetical protein	no homolog
AAEL001654-RA	3.25709	0.0069496	conserved hypothetical protein	FBgn0037783	Npc2c
AAEL008801-RA	3.25553	2.52e-05	conserved hypothetical protein	FBgn0034664	CG4377
AAEL007342-RA	3.2499	1.85e-05	conserved hypothetical protein	FBgn0034758	CG13510
AAEL001646-RA	3.23695	6.12e-05	inward rectifier potassium channel,	FBgn0032706	Irk3
AAEL010634-RA	3.23609	0.000461346	hypothetical protein	no homolog
AAEL012164-RA	3.22337	0.000916898	Spaetzle-like cytokine. [Source:Aedes_ManualAnnotation;Acc:AAEL800596]	FBgn0035056	spz6
AAEL002612-RA	3.22232	0.00377149	hypothetical protein	no homolog
AAEL013710-RA	3.22021	4.58e-05	hypothetical protein	FBgn0035094	CG9380
AAEL012732-RA	3.21628	0.000655108	hypothetical protein	no homolog
AAEL012341-RA	3.21553	0.000132633	lysosomal acid lipase, putative	no homolog
AAEL000309-RB	3.21549	0.000152312	hypothetical protein	FBgn0031055	CG14225
AAEL001897-RA	3.19427	0.000842382	conserved hypothetical protein	no homolog
AAEL007416-RA	3.19199	6.62e-05	cysteine dioxygenase	FBgn0034364	CG5493
AAEL005807-RA	3.19054	3.98e-05	conserved hypothetical protein	no homolog
AAEL010164-RA	3.19044	0.000563393	conserved hypothetical protein	no homolog
AAEL000308-RA	3.18604	0.000362217	conserved hypothetical protein	no homolog
AAEL013033-RA	3.18453	1.52e-05	serine protease, putative	no homolog
AAEL000811-RA	3.18369	0.000401993	GPCR Methuselah Family [Source:Aedes_ManualAnnotation;Acc:AAEL800769]	FBgn0052476	mthl14
AAEL013347-RA	3.18336	9.74e-05	lethal(2)essential for life protein, l2efl	FBgn0001226	Hsp27
AAEL012571-RA	3.18156	9.2e-05	conserved hypothetical protein	FBgn0037779	CG12811
AAEL008039-RA	3.17853	1.88e-05	conserved hypothetical protein	FBgn0035583	CG13704
AAEL002720-RA	3.17427	3.1e-05	Serine Protease Inhibitor (serpin), likely cleavage at V/V. [Source:Aedes_ManualAnnotation;Acc:AAEL800222]	no homolog
AAEL007349-RA	3.17057	5.43e-05	conserved hypothetical protein	FBgn0034758	CG13510
AAEL000834-RA	3.16399	6.92e-05	dimethylaniline monooxygenase	FBgn0034943	Fmo-1
AAEL005675-RA	3.16115	0.000266408	clip-domain serine protease, putative	no homolog
AAEL001163-RA	3.15288	0.000169857	macroglobulin/complement	no homolog
AAEL007714-RA	3.15114	0.0021657	hypothetical protein	no homolog
AAEL011641-RA	3.14358	3.13e-05	transferrin	no homolog
AAEL012099-RA	3.13315	6.89e-05	protease m1 zinc metalloprotease	FBgn0015541	sda
AAEL012007-RA	3.12739	7.33e-05	hypothetical protein	FBgn0035094	CG9380
AAEL006493-RB	3.12508	3.79e-05	hypothetical protein	no homolog
AAEL003074-RA	3.12343	0.00218908	conserved hypothetical protein	no homolog
AAEL003697-RA	3.1141	3.05e-05	Serine Protease Inhibitor (serpin) homologue - unlikely to be inhibitory. [Source:Aedes_ManualAnnotation;Acc:AAEL800220]	no homolog
AAEL015079-RA	3.11089	0.00894297	conserved hypothetical protein	FBgn0039879	Ir100a
AAEL000074-RA	3.10858	3.16e-05	Clip-Domain Serine Protease, family B. [Source:Aedes_ManualAnnotation;Acc:AAEL800806]	no homolog
AAEL008710-RA	3.09806	0.000101842	hypothetical protein	no homolog
AAEL001082-RA	3.09718	1.52e-05	conserved hypothetical protein	FBgn0038294	Mf
AAEL000834-RB	3.09296	6.73e-05	dimethylaniline monooxygenase	FBgn0034943	Fmo-1
AAEL005524-RA	3.09	0.000141715	adenosylhomocysteinase	FBgn0035371	CG9977
AAEL006586-RA	3.08489	0.000243346	serine protease	no homolog
AAEL001565-RA	3.08294	0.000242843	peptidyl-glycine alpha-amidating monooxygenase	FBgn0033466	CG12130
AAEL014608-RA	3.08226	0.000331318	cytochrome P450	no homolog
AAEL013395-RA	3.08031	0.00136648	hypothetical protein	no homolog
AAEL003290-RA	3.06662	0.000353084	cell wall protein DAN4 precursor, putative	FBgn0051253	CG31253
AAEL010079-RA	3.06196	0.00672204	conserved hypothetical protein	no homolog
AAEL006190-RA	3.05951	6.73e-05	conserved hypothetical protein	FBgn0037934	CG6830
AAEL009134-RA	3.0576	3.3e-05	aldo-keto reductase	no homolog
AAEL005253-RA	3.05758	0.000225743	hypothetical protein	no homolog
AAEL011408-RA	3.05648	2.16e-05	C-Type Lectin (CTL). [Source:Aedes_ManualAnnotation;Acc:AAEL800452]	no homolog
AAEL011448-RA	3.05434	0.000117017	conserved hypothetical protein	no homolog
AAEL007626-RA	3.04245	2.68e-05	Gram-Negative Binding Protein (GNBP), or Beta-1,3-Glucan Binding Protein (BGBP). [Source:Aedes_ManualAnnotation;Acc:AAEL800159]	FBgn0040323	GNBP1
AAEL000650-RA	3.02588	4.23e-05	conserved hypothetical protein	no homolog
AAEL012457-RA	3.02326	4.71e-05	alcohol dehydrogenase	no homolog
AAEL010529-RA	3.02159	0.000375259	conserved hypothetical protein	FBgn0035282	CG13936
AAEL008701-RA	3.02037	0.000282311	myoinositol oxygenase	FBgn0036262	CG6910
AAEL000546-RA	3.016	0.000273813		no homolog
AAEL004407-RB	3.01409	0.000398249	allergen, putative	FBgn0034623	CG9822
AAEL009171-RA	2.99892	0.00152236	conserved hypothetical protein	FBgn0039209	CG13624
AAEL010451-RA	2.99559	0.0050102	rabaptin-5, putative	FBgn0027287	Gmap
AAEL002046-RA	2.9948	0.00109932	cytochrome P450 [Source:Aedes_ManualAnnotation;Acc:AAEL800333]	no homolog
AAEL001864-RA	2.9884	7.54e-05	eukaryotic translation initiation factor 4E binding protein (4EBP)	FBgn0022073
AAEL010485-RA	2.98666	0.000263837	sugar transporter	no homolog
AAEL000948-RA	2.98351	6.14e-05	conserved hypothetical protein	FBgn0024361	Tsp2A
AAEL013047-RA	2.9598	0.000101842	sphingolipid delta 4 desaturase/c-4 hydroxylase protein des2	FBgn0001941	ifc
AAEL005666-RA	2.95259	3.1e-05	matrix metalloproteinase	FBgn0035049	Mmp1
AAEL003190-RA	2.94603	0.000269697	hypothetical protein	no homolog
AAEL014166-RA	2.94588	0.000108117	hypothetical protein	no homolog
AAEL007213-RA	2.93723	0.000606621	delta(9)-desaturase, putative	FBgn0038130	CG8630
AAEL001307-RA	2.93721	0.000385227	SEC14, putative	FBgn0031913	CG5958
AAEL006811-RA	2.9344	0.000260817	cytochrome P450 [Source:Aedes_ManualAnnotation;Acc:AAEL800382]	no homolog
AAEL010686-RA	2.93394	0.000217497	hypothetical protein	no homolog
AAEL014614-RA	2.92157	5.21e-05	cytochrome P450	no homolog
AAEL001953-RA	2.92114	0.000515878	conserved hypothetical protein	no homolog
AAEL000915-RA	2.91553	7.09e-06	hypothetical protein	FBgn0032733	CG15170
AAEL012757-RA	2.91089	0.000208165	kynurenine 3-monooxygenase	FBgn0000337	cn
AAEL003439-RA	2.90295	3.79e-05	Caspase (Short). [Source:Aedes_ManualAnnotation;Acc:AAEL800136]	FBgn0028381	decay
AAEL007347-RA	2.90113	0.00135044	conserved hypothetical protein	no homolog
AAEL004724-RA	2.8992	0.000171741		no homolog
AAEL012805-RA	2.89508	0.00252348	hypothetical protein	no homolog
AAEL007450-RA	2.88666	0.00557612	odd skipped, putative	FBgn0002985	odd
AAEL007391-RA	2.8793	6.03e-05	hypothetical protein	no homolog
AAEL015391-RA	2.87883	5.16e-05	gamma glutamyl transpeptidases	FBgn0025837	CG17636
AAEL003728-RA	2.87242	4.44e-05	conserved hypothetical protein	no homolog
AAEL012801-RA	2.86607	0.000133385	sphingolipid delta 4 desaturase/c-4 hydroxylase protein des2	FBgn0001941	ifc
AAEL003568-RA	2.8645	3.35e-05	threonine dehydratase/deaminase	FBgn0037684	CG8129
AAEL014045-RA	2.86348	0.000244461	allantoicase	no homolog
AAEL012532-RB	2.85847	2.27e-05	tetraspanin 29fb	FBgn0032075	Tsp29Fb
AAEL012767-RA	2.85657	0.00549429	conserved hypothetical protein	no homolog
AAEL007281-RA	2.8562	6.62e-05	stretchin-mlck	no homolog
AAEL006834-RA	2.85153	0.000362217	glutamate semialdehyde dehydrogenase	FBgn0037146	CG7470
AAEL012135-RB	2.84875	3.31e-05	Galectin. [Source:Aedes_ManualAnnotation;Acc:AAEL800148]	FBgn0034365	CG5335
AAEL006624-RA	2.84582	0.00562063	conserved hypothetical protein	FBgn0032913	CG9259
AAEL007231-RA	2.84549	0.000136278	conserved hypothetical protein	no homolog
AAEL010884-RA	2.84245	0.00101812	ADP,ATP carrier protein	no homolog
AAEL006649-RA	2.84155	0.000420927	tnf receptor associated factor	FBgn0026319	Traf4
AAEL009642-RA	2.84147	0.00372993	cathepsin b	no homolog
AAEL004341-RA	2.841	3.65e-05		FBgn0000326	clt
AAEL011822-RA	2.84079	0.0001812	gamma glutamyl transpeptidases	FBgn0025837	CG17636
AAEL005536-RB	2.83675	1.14e-05	tetraspanin 29fb	FBgn0032075	Tsp29Fb
AAEL014344-RA	2.8319	0.000642412	adam (a disintegrin and metalloprotease)	no homolog
AAEL000548-RA	2.82616	0.000198109		no_info
AAEL005739-RA	2.82577	6.49e-05	conserved hypothetical protein	no homolog
AAEL009198-RB	2.82168	0.000615092	conserved hypothetical protein	no homolog
AAEL004249-RA	2.81678	0.00148847	conserved hypothetical protein	FBgn0005633	fln
AAEL013798-RA	2.81361	0.000278146	cytochrome P450 [Source:Aedes_ManualAnnotation;Acc:AAEL800311]	FBgn0030615	Cyp4s3
AAEL008622-RA	2.81329	0.0026414	jnk	no homolog
AAEL001519-RA	2.80929	0.000106967	hypothetical protein	FBgn0050456	CG30456
AAEL008529-RA	2.80914	0.0094607	conserved hypothetical protein	FBgn0043796	CG12219
AAEL006518-RA	2.8039	0.000167933	cytidine deaminase, putative	FBgn0032001	CG8360
AAEL010183-RA	2.79992	0.000598235	conserved hypothetical protein	no homolog
AAEL013171-RA	2.79991	0.000658939	Heme Peroxidase. [Source:Aedes_ManualAnnotation;Acc:AAEL800501]	FBgn0038465	Irc
AAEL005543-RA	2.79199	0.00043165	conserved hypothetical protein	FBgn0031033	CG14219
AAEL005948-RA	2.79134	0.00176671	hypothetical protein	no homolog
AAEL012764-RA	2.78792	0.000242843	conserved hypothetical protein	FBgn0038074	CG6188
AAEL014138-RA	2.7876	0.00146393	Serine Protease Inhibitor (serpin), likely cleavage at S/L. [Source:Aedes_ManualAnnotation;Acc:AAEL800219]	FBgn0031973	Spn28D
AAEL007866-RA	2.78263	0.000827001	hypothetical protein	no homolog
AAEL008006-RA	2.78051	6.64e-05	3-hydroxyacyl-coa dehyrogenase	FBgn0030737	CG9914
AAEL003348-RA	2.77514	0.000537734		FBgn0085427	CG34398
AAEL007131-RA	2.77056	0.000228611	sugar transporter	FBgn0037485	CG14606
AAEL003444-RA	2.77055	3.16e-05	Caspase (Short). [Source:Aedes_ManualAnnotation;Acc:AAEL800137]	FBgn0028381	decay
AAEL003184-RB	2.76541	0.000509561	mfs transporter	FBgn0038938	CG7084
AAEL002033-RA	2.76484	0.00644672	hypothetical protein	no homolog
AAEL001325-RB	2.75396	0.00830377	conserved hypothetical protein	no homolog
AAEL003764-RA	2.75038	9.23e-05	hypothetical protein	no homolog
AAEL004319-RA	2.74183	0.00166965	epidermal growth factor receptor	FBgn0003731	Egfr
AAEL014163-RA	2.74024	0.00443082	conserved hypothetical protein	no homolog
AAEL001225-RA	2.73905	0.00294475	glycoside hydrolases	no homolog
AAEL014132-RA	2.73889	6.56e-05	conserved hypothetical protein	FBgn0042103	CG18746
AAEL008753-RA	2.73722	2.89e-05	conserved hypothetical protein	no homolog
AAEL005496-RA	2.73578	1.56e-05	zinc/iron transporter	FBgn0038312	CG4334
AAEL009181-RA	2.73078	4.23e-05	conserved hypothetical protein	no homolog
AAEL005440-RA	2.7299	1.88e-05	conserved hypothetical protein	FBgn0037234	CG9795
AAEL005701-RA	2.72349	0.00254792	retinaldehyde binding protein	no homolog
AAEL005974-RA	2.7212	0.00254608	homeobox protein dbx	FBgn0035292
AAEL005992-RA	2.71965	0.000327953	adam (a disintegrin and metalloprotease)	no homolog
AAEL002257-RA	2.71947	0.000218646	conserved hypothetical protein	no homolog
AAEL004833-RA	2.71941	6.72e-05	Diptericin, Anti-Microbial Peptide. [Source:Aedes_ManualAnnotation;Acc:AAEL800435]	no homolog
AAEL000405-RA	2.71806	0.001217	odd Oz protein	FBgn0004449	Ten-m
AAEL012636-RA	2.7128	7.09e-06	cytochrome b5, putative	FBgn0036575	CG5157
AAEL014914-RA	2.71018	0.000179018	conserved hypothetical protein	FBgn0037779	CG12811
AAEL003873-RA	2.7081	3.65e-05	glycerol-3-phosphate dehydrogenase	FBgn0022160	Gpo-1
AAEL003873-RB	2.70389	2.74e-05	glycerol-3-phosphate dehydrogenase	FBgn0022160	Gpo-1
AAEL001965-RA	2.70274	4.71e-05	imaginal disc growth factor	FBgn0026415	Idgf4
AAEL000786-RA	2.70242	7.89e-05	hypothetical protein	no homolog
AAEL002754-RA	2.69073	0.000624656	nephrin	FBgn0028369	kirre
AAEL013109-RA	2.68935	0.000376436	glutamate transporter	no homolog
AAEL013395-RB	2.68615	0.00146393	hypothetical protein	no homolog
AAEL010980-RA	2.68464	6.61e-05	GPCR Methuselah Family [Source:Aedes_ManualAnnotation;Acc:AAEL800764]	FBgn0028956	mthl3
AAEL006069-RA	2.68436	2.75e-05	conserved hypothetical protein	FBgn0053111	CG33111
AAEL010297-RA	2.6837	0.000348707	hypothetical protein	no homolog
AAEL005440-RB	2.68316	0.000163093	conserved hypothetical protein	FBgn0037234	CG9795
AAEL014268-RA	2.68181	0.000137696	hypothetical protein	no homolog
AAEL006700-RA	2.68096	0.00249108	trypsin, putative	FBgn0033277	CG14760
AAEL012577-RA	2.68022	0.00020249	conserved hypothetical protein	FBgn0037779	CG12811
AAEL012340-RA	2.67664	0.000399711	lipase 1 precursor	FBgn0032264	Lip4
AAEL012536-RA	2.67461	0.000249808	hypothetical protein	FBgn0052397	CG32397
AAEL013961-RA	2.67435	0.00997347	conserved hypothetical protein	FBgn0085320	CG34291
AAEL001737-RA	2.67398	0.00034622	conserved hypothetical protein	no homolog
AAEL002992-RA	2.6732	0.000444278	sphingolipid delta 4 desaturase/c-4 hydroxylase protein des2	FBgn0001941	ifc
AAEL011126-RA	2.66914	4.41e-05	alcohol dehydrogenase	no homolog
AAEL013223-RA	2.66492	0.00335375	hypothetical protein	no homolog
AAEL012093-RA	2.6598	6.79e-05	leucine-rich transmembrane protein	FBgn0034717	CG5819
AAEL004025-RA	2.65252	5.16e-05	glucose dehydrogenase	FBgn0030594	CG9509
AAEL002558-RA	2.64418	0.00131059	myomesin	FBgn0005666	bt
AAEL005332-RA	2.6433	0.000141715	hypothetical protein	no homolog
AAEL007792-RA	2.64163	3.79e-05	conserved hypothetical protein	FBgn0034279	CG18635
AAEL000549-RA	2.64115	0.000134885	fibulin 1 and	FBgn0051999	CG31999
AAEL000244-RA	2.63678	7.09e-06	alpha(1,3)fucosyltransferase	FBgn0044872	FucTC
AAEL008036-RA	2.63374	0.000420927	dynein heavy chain	FBgn0035581	CG17150
AAEL010125-RA	2.63199	0.000595867	mitotic protein phosphatase 1 regulator, putative	FBgn0038865	CG10824
AAEL006281-RA	2.62909	0.00353506	glucose transporter (sugar transporter	FBgn0028563	sut1
AAEL007784-RA	2.62263	3.16e-05	conserved hypothetical protein	no homolog
AAEL001194-RA	2.62122	0.000283351	fatty acid synthase	FBgn0027571	CG3523
AAEL003408-RA	2.62015	0.00877906	leucine-rich transmembrane protein	FBgn0036995	CG5195
AAEL011980-RA	2.61699	0.000207542	hypothetical protein	no homolog
AAEL012853-RA	2.61684	9.93e-05	hypothetical protein	no homolog
AAEL006909-RA	2.61507	0.000165791	hypothetical protein	no homolog
AAEL000428-RA	2.61363	8.78e-06	tryptophan 2,3-dioxygenase	FBgn0003965	v
AAEL000200-RA	2.61357	0.000118158	conserved hypothetical protein	no homolog
AAEL014605-RA	2.61064	4.65e-05	cytochrome P450	no homolog
AAEL007381-RA	2.6035	0.000164946	conserved hypothetical protein	no homolog
AAEL009899-RA	2.60123	0.000237108	conserved hypothetical protein	FBgn0039151	CG13607
AAEL009852-RB	2.59902	2.74e-05	conserved hypothetical protein	no homolog
AAEL013039-RA	2.59666	0.000146727	conserved hypothetical protein	no homolog
AAEL006102-RA	2.5936	9.63e-06	gelsolin precursor	FBgn0010225	Gel
AAEL007833-RA	2.59331	0.000210393	hypothetical protein	no homolog
AAEL010161-RA	2.5927	0.000571328	conserved hypothetical protein	no homolog
AAEL005849-RA	2.58196	0.00166903	synaptic vesicle protein	FBgn0029896	CG3168
AAEL014936-RA	2.58125	0.000242843	sarcosine dehydrogenase	FBgn0034276	CG6385
AAEL002853-RA	2.57903	0.000182923	ccaat/enhancer binding protein	FBgn0005638	slbo
AAEL012944-RA	2.57848	0.00016139	60S ribosomal protein L11	FBgn0013325	RpL11
AAEL009852-RA	2.57625	1.47e-05	conserved hypothetical protein	no homolog
AAEL004786-RA	2.574	0.00011103	conserved hypothetical protein	FBgn0033785	Sans
AAEL001577-RA	2.57284	0.000270934	conserved hypothetical protein	FBgn0034662	CG13492
AAEL005618-RA	2.5708	5.83e-05	chitin synthase	FBgn0029091	CS-2
AAEL002130-RA	2.56662	3.77e-05	ecdysone inducible protein L2, putative	FBgn0001257	ImpL2
AAEL003593-RA	2.5656	0.000221119	hypothetical protein	no homolog
AAEL002481-RA	2.5654	0.000129432	hypothetical protein	FBgn0036947	obst-F
AAEL002165-RA	2.56539	0.000109227	conserved hypothetical protein	FBgn0011770	Gip
AAEL012549-RA	2.56043	5.83e-05	ATPase, class vi, type 11c	FBgn0030747	CG4301
AAEL013432-RA	2.55948	6.78e-05	serine protease, putative	no homolog
AAEL010160-RA	2.55738	0.000495984	conserved hypothetical protein	no homolog
AAEL013780-RA	2.55435	0.0059851	conserved hypothetical protein	no homolog
AAEL009952-RA	2.55246	0.000161651	hypothetical protein	no homolog
AAEL010016-RA	2.5516	0.00044745	hypothetical protein	no homolog
AAEL011624-RA	2.54978	0.000484093	granzyme A precursor, putative	FBgn0003450	snk
AAEL013542-RA	2.54787	0.000572845	elongase, putative	FBgn0034382	CG18609
AAEL010763-RA	2.54111	0.00273233	hypothetical protein	FBgn0034420	CG10737
AAEL000668-RA	2.54021	0.00155003	conserved hypothetical protein	no homolog
AAEL007033-RA	2.53661	0.000167823	pyrroline-5-carboxylate reductase	FBgn0038516	CG5840
AAEL008846-RA	2.53597	0.000119036	cytochrome P450 [Source:Aedes_ManualAnnotation;Acc:AAEL800379]	no homolog
AAEL008117-RA	2.53492	0.000192173	ion channel nompc	no homolog
AAEL008024-RA	2.53408	0.000643376	hypothetical protein	FBgn0030847	CG12991
AAEL009531-RA	2.5312	0.000147073	niemann-pick C1	FBgn0031140
AAEL006805-RA	2.52922	0.000334233	cytochrome P450 [Source:Aedes_ManualAnnotation;Acc:AAEL800367]	no homolog
AAEL006886-RA	2.52659	0.000117841	conserved hypothetical protein	FBgn0033153	Gadd45
AAEL006053-RA	2.52377	0.000147073	conserved hypothetical protein	no homolog
AAEL002593-RA	2.52184	9.63e-05	serine protease	FBgn0058160	CG40160
AAEL005294-RA	2.52099	0.001214	Galectin. [Source:Aedes_ManualAnnotation;Acc:AAEL800151]	no homolog
AAEL003413-RA	2.52044	7.34e-05	F-spondin	FBgn0026721	fat-spondin
AAEL008477-RA	2.51883	2.02e-05	hypothetical protein	no homolog
AAEL002721-RA	2.51716	0.000200455	conserved hypothetical protein	FBgn0000575	emc
AAEL002884-RA	2.51673	0.00261817	hypothetical protein	FBgn0039212	Syx18
AAEL009726-RA	2.51532	0.000112591	clip-domain serine protease, putative	no homolog
AAEL009862-RA	2.50414	2.86e-05	conserved hypothetical protein	no homolog
AAEL001914-RA	2.50329	0.000234676	scavenger receptor, putative	FBgn0031571	CG3921
AAEL014438-RA	2.50279	0.00110032	juvenile hormone-inducible protein, putative	FBgn0037934	CG6830
AAEL013441-RA	2.50161	4.1e-05	Toll-like Receptor. [Source:Aedes_ManualAnnotation;Acc:AAEL800237]	FBgn0036978	Toll-9
AAEL006990-RA	2.50083	9.28e-05	conserved hypothetical protein	no homolog
AAEL000567-RA	2.49262	7.92e-05	sugar transporter	FBgn0050035	CG30035
AAEL007088-RA	2.49029	0.0032511	ribitol kinase	FBgn0035484	CG11594
AAEL012859-RA	2.4898	7.27e-05	conserved hypothetical protein	no homolog
AAEL013990-RA	2.48214	0.000123311	hexamerin 2 beta	FBgn0002562	Lsp1alpha
AAEL014350-RA	2.4807	9.81e-05	hypothetical protein	no homolog
AAEL007816-RA	2.47981	4.58e-05	cytochrome P450 [Source:Aedes_ManualAnnotation;Acc:AAEL800299]	FBgn0011576	Cyp4d2
AAEL012567-RA	2.47774	0.000192071	synaptic vesicle protein	FBgn0051106	CG31106
AAEL003597-RA	2.47652	1.29e-05	leucine-rich transmembrane protein	FBgn0038638	CG7702
AAEL010480-RA	2.47479	0.000183916	serine-pyruvate aminotransferase	FBgn0014031	Spat
AAEL011499-RA	2.47284	0.00704221	odorant-binding protein 58c, putative	no homolog
AAEL003720-RA	2.47186	4.23e-05	leucine-rich transmembrane protein	FBgn0013272	Gp150
AAEL009205-RA	2.46868	0.000751689	conserved hypothetical protein	no homolog
AAEL006793-RA	2.46753	6.51e-05	cytochrome P450 [Source:Aedes_ManualAnnotation;Acc:AAEL800383]	no homolog
AAEL010174-RA	2.46529	0.00526947	conserved hypothetical protein	no homolog
AAEL009955-RA	2.45805	0.000101312	conserved hypothetical protein	FBgn0016724
AAEL010836-RA	2.45531	0.00238824	ribitol kinase	FBgn0035484	CG11594
AAEL011507-RA	2.45366	0.00161804	zinc finger protein	no homolog
AAEL000294-RA	2.45254	0.000101842	conserved hypothetical protein	no homolog
AAEL002959-RA	2.45011	0.000567704	brain chitinase and chia	no homolog
AAEL000530-RA	2.44848	2.75e-05		no homolog
AAEL003777-RA	2.44839	0.00837944	hypothetical protein	FBgn0044452	Atg2
AAEL010416-RA	2.44529	5.63e-05	hypothetical protein	no homolog
AAEL007006-RA	2.44528	7.55e-05	Clip-Domain Serine Protease, family A. [Source:Aedes_ManualAnnotation;Acc:AAEL800805]	FBgn0032507	CG9377
AAEL004931-RB	2.44414	0.000871129	beta-hexosaminidase b	no homolog
AAEL014348-RB	2.44326	0.000348707	Caspase (Short). [Source:Aedes_ManualAnnotation;Acc:AAEL800132]	no homolog
AAEL002227-RA	2.43881	0.000170638	fatty acid synthase	FBgn0040001	CG17374
AAEL001611-RA	2.43848	0.000468787	conserved hypothetical protein	FBgn0034126	CG4398
AAEL010671-RA	2.43623	0.000183916	oxidoreductase	no homolog
AAEL007517-RA	2.4308	0.000582546	oviductin	FBgn0034661	CG4386
AAEL001694-RA	2.42559	0.00311824	conserved hypothetical protein	FBgn0034565	CG15650
AAEL012017-RA	2.42472	0.000298741	hypothetical protein	no homolog
AAEL004931-RA	2.4212	0.000797371	beta-hexosaminidase b	no homolog
AAEL008286-RA	2.41931	0.00161423	conserved hypothetical protein	no homolog
AAEL013840-RA	2.41247	0.000134479	conserved hypothetical protein	FBgn0030964	Pvf1
AAEL013545-RA	2.41148	0.000418149	hypothetical protein	no homolog
AAEL002267-RA	2.41072	3.16e-05	conserved hypothetical protein	no homolog
AAEL006604-RA	2.40998	0.00939341	conserved hypothetical protein	FBgn0032911	tadr
AAEL007106-RA	2.40989	0.000203326	serine protease, putative	no homolog
AAEL002672-RA	2.40838	0.00108149	matrix metalloproteinase	no homolog
AAEL002923-RA	2.40804	8.63e-05	hypothetical protein	no homolog
AAEL009129-RA	2.40435	0.000123311	cytochrome P450 [Source:Aedes_ManualAnnotation;Acc:AAEL800359]	FBgn0039006	Cyp6d4
AAEL010748-RA	2.40159	1.85e-05	hypothetical protein	no homolog
AAEL010920-RA	2.40074	0.000503047	conserved hypothetical protein	FBgn0034126	CG4398
AAEL003748-RA	2.39884	0.000841092	cytochrome P450 [Source:Aedes_ManualAnnotation;Acc:AAEL800360]	no homolog
AAEL015631-RA	2.39745	5.04e-05	asparagine synthetase	FBgn0041607	asparagine-synthetase
AAEL006995-RA	2.39431	0.000806266	sodium/solute symporter	FBgn0051090
AAEL005593-RA	2.39305	3.13e-05	conserved hypothetical protein	FBgn0033446	CG1648
AAEL005315-RA	2.39225	0.00283022	conserved hypothetical protein	FBgn0036259	CG9760
AAEL009645-RB	2.39107	4.92e-05	hypothetical protein	no homolog
AAEL006969-RA	2.39104	0.000774089	conserved hypothetical protein	no homolog
AAEL008153-RA	2.38988	0.00581291	conserved hypothetical protein	FBgn0042102	CG18745
AAEL010157-RA	2.38755	0.000133434	microsomal glutathione s-transferase	FBgn0025814	Mgstl
AAEL012763-RA	2.38206	0.000190034	conserved hypothetical protein	no homolog
AAEL001747-RA	2.38121	0.000293035	conserved hypothetical protein	no homolog
AAEL001998-RA	2.37824	0.000223334	conserved hypothetical protein	no homolog
AAEL012492-RA	2.37523	2.66e-05	cytochrome P450 [Source:Aedes_ManualAnnotation;Acc:AAEL800318]	FBgn0013772	Cyp6a8
AAEL009045-RA	2.37459	0.000501503	amine oxidase	no homolog
AAEL003626-RA	2.3745	9.81e-05	sodium/chloride dependent amino acid transporter	no homolog
AAEL003066-RB	2.37293	0.000714257	brain chitinase and chia	FBgn0034580	Cht8
AAEL001529-RA	2.37202	0.000121679	hypothetical protein	no homolog
AAEL009018-RA	2.37136	0.000269697	cytochrome P450	no homolog
AAEL001621-RA	2.36995	0.000430539	conserved hypothetical protein	FBgn0034126	CG4398
AAEL006962-RB	2.36904	6.03e-05	hypothetical protein	no homolog
AAEL008160-RA	2.36682	0.000229331	fatty acid synthase	no homolog
AAEL015471-RA	2.364	0.00119959	conserved hypothetical protein	no homolog
AAEL004214-RA	2.36093	0.00144627	hypothetical protein	FBgn0002306	sas
AAEL000471-RA	2.35612	0.00124904	monocarboxylate transporter	FBgn0033913	CG8468
AAEL011206-RA	2.35418	0.000171741	aminoacylase, putative	FBgn0037818	CG6465
AAEL008478-RA	2.34664	0.000315638	conserved hypothetical protein	FBgn0030740	CG9917
AAEL007905-RA	2.34638	3.94e-05	hypothetical protein	no homolog
AAEL010276-RA	2.34542	3.61e-05	aminomethyltransferase	FBgn0032287	CG6415
AAEL012855-RA	2.33595	0.00114567	hypothetical protein	no homolog
AAEL012858-RA	2.33542	0.00545411	hypothetical protein	no homolog
AAEL001788-RA	2.33402	0.00160421	hypothetical protein	no homolog
AAEL004665-RA	2.33371	0.00195792	conserved hypothetical protein	no homolog
AAEL015019-RA	2.33325	0.00562586	hypothetical protein	no homolog
AAEL013987-RA	2.33314	3.97e-05	conserved hypothetical protein	FBgn0034501	CG13868
AAEL009745-RA	2.33244	0.0015585	nitric oxide synthase	FBgn0011676	Nos
AAEL007557-RA	2.33091	7.14e-05	asparagine synthetase	FBgn0041607	asparagine-synthetase
AAEL013041-RA	2.32598	0.00477236	hypothetical protein	no homolog
AAEL012639-RA	2.32571	0.00115703	hypothetical protein	no homolog
AAEL013857-RA	2.32441	7.88e-05	conserved hypothetical protein	no homolog
AAEL001328-RA	2.32434	0.000109411	hypothetical protein	no homolog
AAEL011407-RA	2.32434	0.000971067	C-Type Lectin (CTL). [Source:Aedes_ManualAnnotation;Acc:AAEL800451]	no homolog
AAEL007055-RA	2.3218	0.000187858	lipase	FBgn0039476	CG6271
AAEL014875-RA	2.31981	0.00930159	hypothetical protein	no homolog
AAEL010653-RA	2.31973	0.000129184	alpha-l-fucosidase	FBgn0036169	Fuca
AAEL001471-RA	2.31861	0.000165674	hypothetical protein	FBgn0003231	ref(2)P
AAEL011206-RB	2.31809	0.000199824	aminoacylase, putative	FBgn0037818	CG6465
AAEL013857-RB	2.31386	3.68e-05	conserved hypothetical protein	no homolog
AAEL008153-RB	2.31372	5.16e-05	conserved hypothetical protein	FBgn0042102	CG18745
AAEL009148-RA	2.31359	0.000256512	hypothetical protein	FBgn0028518	CG18480
AAEL005935-RA	2.31316	0.000960146	hypothetical protein	no homolog
AAEL011500-RB	2.31293	0.000118231	Cdc42 protein, putative	no homolog
AAEL011803-RA	2.31153	6.49e-05	prohibitin, putative	FBgn0030992	CG33253
AAEL002292-RA	2.30706	0.000155334	glucose transport protein, putative	FBgn0036068	CG6640
AAEL014817-RA	2.30573	0.000174854	serine-pyruvate aminotransferase	FBgn0014031	Spat
AAEL003434-RA	2.30469	0.000171741	alpha-amylase	FBgn0033296	CG11669
AAEL003457-RA	2.30133	0.000401993	conserved hypothetical protein	no homolog
AAEL004999-RA	2.29582	0.000262146	hypothetical protein	no homolog
AAEL001818-RA	2.28698	0.000697795	conserved hypothetical protein	no homolog
AAEL003345-RA	2.28636	0.000268323	argininosuccinate lyase	FBgn0032076	CG9510
AAEL003625-RA	2.28591	0.000635567	Clip-Domain Serine Protease, family B. [Source:Aedes_ManualAnnotation;Acc:AAEL800809]	FBgn0039758	CG9737
AAEL012131-RA	2.28513	0.000193904	cationic amino acid transporter	FBgn0037203	slif
AAEL001289-RA	2.28375	7.21e-05	permease, putative	no homolog
AAEL009831-RA	2.28266	6.14e-05	pyrroline-5-carboxylate reductase	FBgn0038516	CG5840
AAEL006795-RA	2.28124	0.000133385	cytochrome P450 [Source:Aedes_ManualAnnotation;Acc:AAEL800362]	no homolog
AAEL003632-RA	2.27862	0.000264095	Clip-Domain Serine Protease, family B. [Source:Aedes_ManualAnnotation;Acc:AAEL800834]	FBgn0039758	CG9737
AAEL002600-RA	2.27666	0.000100578	serine protease	FBgn0032213	CG5390
AAEL005375-RA	2.27659	0.000655108	glucosyl/glucuronosyl transferases	FBgn0050438	CG30438
AAEL014892-RA	2.26778	0.000278146	cytochrome P450	FBgn0000473	Cyp6a2
AAEL011905-RA	2.26582	0.000217497	myosin i	FBgn0010246	Myo61F
AAEL013111-RA	2.26491	0.00058773	glutamate transporter	no homolog
AAEL004979-RA	2.26489	0.000638999	Clip-Domain Serine Protease, family D. [Source:Aedes_ManualAnnotation;Acc:AAEL800558]	FBgn0051728	CG31728
AAEL012702-RA	2.26177	0.000318751	ATP-binding cassette sub-family A member 3, putative	FBgn0031170	CG1718
AAEL009015-RA	2.26065	0.000572845	hypothetical protein	no homolog
AAEL002753-RA	2.26028	0.000900209	zinc finger protein	no homolog
AAEL008361-RB	2.25935	0.000280584	hypothetical protein	no homolog
AAEL013884-RA	2.25895	0.000192458	synaptic vesicle protein	FBgn0030331	CG15221
AAEL008828-RA	2.2518	8.63e-05	carbonic anhydrase	FBgn0039486	CG6074
AAEL005194-RA	2.24969	0.00725342	fibrinogen and fibronectin	no homolog
AAEL010787-RC	2.24883	8.67e-05	DEAD box ATP-dependent RNA helicase	FBgn0003261	Rm62
AAEL013024-RA	2.24758	0.00215537	hypothetical protein	no homolog
AAEL013875-RA	2.24753	5.63e-05	tetraspanin, putative	FBgn0029507	Tsp42Ed
AAEL013413-RA	2.24689	0.000268373	hypothetical protein	no homolog
AAEL010448-RA	2.24291	0.00149366	conserved hypothetical protein	no homolog
AAEL004658-RA	2.23873	2.52e-05	hypothetical protein	FBgn0050015	CG30015
AAEL007870-RA	2.23855	0.0026335	hypothetical protein	no homolog
AAEL014749-RA	2.23798	6.73e-05	ral	FBgn0015286	Rala
AAEL012296-RA	2.23618	0.000265579	conserved hypothetical protein	no homolog
AAEL004684-RA	2.23594	0.00263165	conserved hypothetical protein	FBgn0050392	CG30392
AAEL013760-RA	2.23407	3.35e-05	homeobox protein nk-2	no homolog
AAEL001305-RA	2.23376	2.74e-05	conserved hypothetical protein	no homolog
AAEL015304-RA	2.23329	2.48e-05	conserved hypothetical protein	FBgn0035189	CG9119
AAEL000931-RA	2.23299	4.41e-05	alkaline phosphatase	FBgn0016123	Aph-4
AAEL013381-RA	2.23132	7.33e-05	integrin alpha-ps	FBgn0003328	scb
AAEL004067-RA	2.22986	0.000672816	mitochondrial benzodiazepine receptor, putative	FBgn0031263	CG2789
AAEL001095-RA	2.22841	0.000214962	hypothetical protein	no homolog
AAEL012786-RA	2.22785	0.000277892	conserved hypothetical protein	FBgn0038897	CG5849
AAEL011899-RA	2.22767	6.89e-05	N-acetyllactosaminide beta-1,3-N-acetylglucosaminyltransferase, putative	FBgn0031732	CG11149
AAEL001104-RA	2.2258	0.000170638	conserved hypothetical protein	FBgn0036372	CG10083
AAEL005337-RA	2.22485	9.29e-05	carbonic anhydrase	FBgn0027843	CAH2
AAEL006517-RA	2.22472	0.000631613	conserved hypothetical protein	FBgn0031225
AAEL009458-RB	2.22332	0.000176565	syntaxin 4,	FBgn0024980	Syx4
AAEL005177-RA	2.22317	0.000320291	adenylate cyclase	FBgn0040507	ACXD
AAEL001233-RA	2.22311	0.00186403	Clip-Domain Serine Protease, family E. Protease homologue. [Source:Aedes_ManualAnnotation;Acc:AAEL800565]	no homolog
AAEL009658-RA	2.22116	0.000101312	alpha,alpha-trehalase	FBgn0003748	Treh
AAEL014353-RA	2.22097	0.000986343	conserved hypothetical protein	no homolog
AAEL010555-RA	2.22042	0.000261354	sterol regulatory element-binding protein	FBgn0015234
AAEL010854-RA	2.21992	0.000359275	ubiquitin specific protease 2,	FBgn0031187	CG14619
AAEL010379-RA	2.21945	0.00398592	ATP-binding cassette transporter	FBgn0004512	Mdr49
AAEL009658-RC	2.219	0.00010366	alpha,alpha-trehalase	FBgn0003748	Treh
AAEL005187-RA	2.21872	0.000282939	laminin gamma 1 chain	FBgn0002528	LanB2
AAEL004921-RA	2.21857	0.00587862	conserved hypothetical protein	FBgn0033730	Cpr49Ag
AAEL013875-RB	2.2131	5.43e-05	tetraspanin, putative	FBgn0029507	Tsp42Ed
AAEL009199-RA	2.2126	0.000381695	core 1 udp-galactose:n-acetylgalactosamine-alpha-r beta 1,3- galactosyltransferase	FBgn0031472	CG2983
AAEL006921-RA	2.21078	0.000106009	calmodulin	FBgn0040351	CG11638
AAEL011153-RA	2.2094	0.00163138	hypothetical protein	no homolog
AAEL008632-RA	2.20829	4.71e-05	ABC transporter	no homolog
AAEL011302-RE	2.20806	6.29e-05	annexin	FBgn0000083	AnnIX
AAEL006096-RA	2.20437	3.38e-05	Gelsolin precursor	FBgn0010225	Gel
AAEL000639-RA	2.20316	0.000127381	n-acetylgalactosaminyltransferase	FBgn0035375	pgant6
AAEL015437-RA	2.20281	0.000679525	conserved hypothetical protein	FBgn0041585	olf186-F
AAEL007139-RA	2.20057	0.00593857	sugar transporter	FBgn0037485	CG14606
AAEL009861-RB	2.19924	0.000137298	conserved hypothetical protein	FBgn0034638	CG10433
AAEL009861-RD	2.19795	6.66e-05	conserved hypothetical protein	FBgn0034638	CG10433
AAEL015070-RA	2.19746	0.00111631	alkaline phosphatase	FBgn0035620	CG5150
AAEL010979-RA	2.19566	0.00410115	growth factor receptor-bound protein	FBgn0031079	jog
AAEL000762-RA	2.19536	0.000171741	lumican, putative	no homolog
AAEL009126-RA	2.19316	0.00102129	cytochrome P450 [Source:Aedes_ManualAnnotation;Acc:AAEL800351]	FBgn0033304	Cyp6a13
AAEL000500-RA	2.19199	0.00183261	conserved hypothetical protein	no homolog
AAEL003831-RA	2.1876	8.13e-05	fatty acid hydroxylase	FBgn0050502	CG30502
AAEL002985-RB	2.18613	0.0046535	mitchondrial carnitine/acylcarnitine carrier protein CACL, putative	FBgn0039525	CG5646
AAEL000049-RA	2.18469	0.0001112	three prime repair exonuclease 1, putative	FBgn0031484	CG3165
AAEL005434-RA	2.18446	0.00130195	conserved hypothetical protein	no homolog
AAEL002704-RB	2.18399	0.000140476	Serine Protease Inhibitor (serpin) homologue - unlikely to be inhibitory. [Source:Aedes_ManualAnnotation;Acc:AAEL800225]	no homolog
AAEL006260-RA	2.18243	0.00052335	serine protease, putative	no homolog
AAEL000024-RA	2.18226	0.000171741	dopachrome-conversion enzyme (DCE), putative	FBgn0041710	yellow-f
AAEL009055-RA	2.17972	0.00208117	gliotactin	FBgn0001987	Gli
AAEL012600-RA	2.17931	0.000558075	hypothetical protein	no homolog
AAEL003611-RA	2.17704	0.000156076	stearoyl-coa desaturase	FBgn0039755	CG15531
AAEL005242-RA	2.17681	0.00175158	hypothetical protein	no homolog
AAEL002696-RA	2.17665	0.000314063	hypothetical protein	no homolog
AAEL001180-RA	2.17663	0.000733308	hypothetical protein	no homolog
AAEL001420-RA	2.17574	0.000120215	conserved hypothetical protein	no homolog
AAEL001046-RA	2.17526	0.00265078	phosphatase fragment	FBgn0037929
AAEL003104-RA	2.16927	0.000141138	tripartite motif protein trim2,3	FBgn0034412	abba
AAEL000028-RA	2.16535	0.000185525	Clip-Domain Serine Protease, family B. [Source:Aedes_ManualAnnotation;Acc:AAEL800829]	no homolog
AAEL002276-RA	2.16163	6.79e-05	serine protease, putative	no homolog
AAEL001417-RA	2.16029	0.000156076	conserved hypothetical protein	no homolog
AAEL007628-RA	2.15925	0.00426053		no_info
AAEL005753-RA	2.15747	8.18e-05	serine protease	FBgn0003450	snk
AAEL011991-RA	2.15676	0.000226463	Clip-Domain Serine Protease, family C. [Source:Aedes_ManualAnnotation;Acc:AAEL800842]	FBgn0034139	CG4927
AAEL013163-RA	2.15647	8.71e-05	conserved hypothetical protein	FBgn0027547	CG1927
AAEL001214-RA	2.15624	0.0039796		no_info
AAEL013184-RA	2.15296	6.79e-05	conserved hypothetical protein	FBgn0017561	Ork1
AAEL005102-RA	2.1522	0.000116694	conserved hypothetical protein	FBgn0035189	CG9119
AAEL006754-RA	2.1479	3.3e-05	conserved hypothetical protein	no homolog
AAEL009056-RA	2.14785	0.00650094	hypothetical protein	FBgn0030432	CG4404
AAEL010374-RA	2.14726	0.000399711	tyrosine-protein kinase transmembrane receptor	FBgn0010407	Ror
AAEL008804-RA	2.14687	0.00132503	hypothetical protein	no homolog
AAEL011859-RA	2.14624	0.000133385	conserved hypothetical protein	FBgn0036826	CG3893
AAEL008365-RA	2.14522	0.000284097	conserved hypothetical protein	no homolog
AAEL011898-RA	2.14424	0.00044512	1-acyl-sn-glycerol-3-phosphate acyltransferase	FBgn0026718	fu12
AAEL009291-RA	2.14018	0.000348707	retinoid-inducible serine carboxypeptidase (serine carboxypeptidase	FBgn0038738	CG4572
AAEL009842-RA	2.13656	0.000412093	Galectin. [Source:Aedes_ManualAnnotation;Acc:AAEL800156]	no homolog
AAEL009513-RA	2.13524	0.000203354	adenylate cyclase	no homolog
AAEL010445-RA	2.1345	0.0033024	hypothetical protein	no homolog
AAEL013224-RA	2.1342	0.00151421	hypothetical protein	no homolog
AAEL012867-RA	2.13246	0.000137298	conserved hypothetical protein	no homolog
AAEL009467-RA	2.13181	6.73e-05	conserved hypothetical protein	FBgn0030955	CG6891
AAEL010398-RA	2.13097	0.00248854	hypothetical protein	no homolog
AAEL002780-RA	2.13078	0.00271639	conserved hypothetical protein	no homolog
AAEL003076-RA	2.13074	4.39e-05	glucosyl/glucuronosyl transferases	FBgn0036842	CG3797
AAEL002280-RA	2.12968	0.000286282	ctl2	FBgn0039637	CG11880
AAEL000165-RB	2.12961	0.000374074	conserved hypothetical protein	no homolog
AAEL013656-RA	2.12713	7.33e-05	bm-40 precursor	FBgn0026562	BM-40-SPARC
AAEL003209-RA	2.12551	0.00428621	lachesin	FBgn0000071	Ama
AAEL002665-RA	2.12446	0.000434942	matrix metalloproteinase	no homolog
AAEL006034-RA	2.12238	0.00255966	Vanin-like protein 1 precursor, putative	FBgn0040069	vanin-like
AAEL011991-RB	2.1213	0.000546611		no_info
AAEL013586-RA	2.11589	0.00328737	hypothetical protein	no homolog
AAEL014354-RA	2.11582	0.000332985	Clip-Domain Serine Protease, family B. [Source:Aedes_ManualAnnotation;Acc:AAEL800838]	no homolog
AAEL000850-RA	2.1158	0.000140476	tyrosine kinase receptor	FBgn0022800	Cad96Ca
AAEL000638-RA	2.11543	0.000171741	hypothetical protein	no homolog
AAEL008410-RA	2.11527	3.1e-05	helix-loop-helix transcription factor	no homolog
AAEL003267-RA	2.11505	0.000120215		FBgn0038881	CG16791
AAEL003844-RB	2.11492	3.18e-05		no_info
AAEL005040-RA	2.11483	9.42e-05	conserved hypothetical protein	no homolog
AAEL010151-RA	2.11445	7.55e-05	cytochrome P450 [Source:Aedes_ManualAnnotation;Acc:AAEL800349]	FBgn0013772	Cyp6a8
AAEL012494-RA	2.11425	0.000161651	cytochrome P450 [Source:Aedes_ManualAnnotation;Acc:AAEL800331]	FBgn0000473	Cyp6a2
AAEL000406-RA	2.11144	0.000147597	conserved hypothetical protein	no homolog
AAEL015414-RA	2.10984	0.00191663	hypothetical protein	no homolog
AAEL014931-RB	2.10929	7.99e-05	sarm1	FBgn0085402	Ect4
AAEL003888-RA	2.10788	0.000505663	ubiquitin	FBgn0003943	Ubi-p63E
AAEL003726-RA	2.10784	0.000156222	conserved hypothetical protein	no homolog
AAEL000165-RA	2.10397	0.00151821	conserved hypothetical protein	no homolog
AAEL000341-RA	2.1038	0.000249614	basic helix-loop-helix protein	FBgn0032651	Oli
AAEL011566-RA	2.10328	0.000416535	cell adhesion molecule	no homolog
AAEL006699-RA	2.10225	0.000335674	fibrinogen and fibronectin	no homolog
AAEL007226-RA	2.10188	0.000367401	nidogen	FBgn0026403	Ndg
AAEL004930-RA	2.10154	0.00034622	carbonic anhydrase	FBgn0027844	CAH1
AAEL008802-RA	2.09962	2.16e-05	conserved hypothetical protein	no homolog
AAEL000059-RA	2.09604	0.000413938	Clip-Domain Serine Protease, family B. Protease homologue. [Source:Aedes_ManualAnnotation;Acc:AAEL800815]	no homolog
AAEL008546-RA	2.09493	0.000918279	conserved hypothetical protein	FBgn0023540	CG3630
AAEL006704-RA	2.09325	0.000427339	fibrinogen and fibronectin	no homolog
AAEL010623-RA	2.09243	0.000777711	conserved hypothetical protein	FBgn0037410	Osi2
AAEL010028-RA	2.09211	0.000953594	sarcosine dehydrogenase	FBgn0034276	CG6385
AAEL002294-RA	2.09091	0.000164582	sulphate transporter	no homolog
AAEL010951-RA	2.08924	0.000147073	glutamate decarboxylase	FBgn0036975	CG5618
AAEL000489-RA	2.08896	0.00678388	P21-activated kinase, pak	FBgn0044826	Pak3
AAEL012650-RA	2.08839	0.00902972	conserved hypothetical protein	no homolog
AAEL000227-RA	2.08819	0.000956006	Class B Scavenger Receptor (CD36 domain). [Source:Aedes_ManualAnnotation;Acc:AAEL800196]	FBgn0035091	CG3829
AAEL003978-RA	2.08799	0.00239215	hypothetical protein	FBgn0035144	CG17181
AAEL004969-RA	2.0827	0.00024647	conserved hypothetical protein	FBgn0032136	CG15828
AAEL004407-RA	2.08248	0.000751689	allergen, putative	FBgn0034623	CG9822
AAEL009510-RA	2.08188	1.27e-05	glucosamine-fructose-6-phosphate aminotransferase	FBgn0027341	Gfat1
AAEL002484-RA	2.08106	0.00669841	conserved hypothetical protein	FBgn0051323	CG31323
AAEL006916-RA	2.07798	0.00106037	expressed protein (Svp)	FBgn0003651	svp
AAEL005397-RA	2.07556	0.000338525	conserved hypothetical protein	FBgn0051663	CG31663
AAEL008775-RA	2.07476	0.000200929	hypothetical protein	no homolog
AAEL010806-RA	2.07452	0.000109411	conserved hypothetical protein	FBgn0038302	CG4210
AAEL006702-RB	2.07447	0.000856269	fibrinogen and fibronectin	no homolog
AAEL011741-RB	2.07426	0.000667876	glutathione transferase [Source:Aedes_ManualAnnotation;Acc:AAEL800407]	FBgn0010226	GstS1
AAEL010929-RA	2.074	0.000532058	G-protein coupled receptor	FBgn0029909	CG12796
AAEL002969-RA	2.07151	0.00233583	brain chitinase and chia	no homolog
AAEL009492-RA	2.06948	5.71e-05	conserved hypothetical protein	FBgn0030234	CG15211
AAEL002731-RA	2.06917	0.000208597	Serine Protease Inhibitor (serpin) homologue - unlikely to be inhibitory. [Source:Aedes_ManualAnnotation;Acc:AAEL800218]	no homolog
AAEL000496-RA	2.06379	0.00485843	conserved hypothetical protein	no homolog
AAEL010128-RA	2.06306	0.000237373	conserved hypothetical protein	FBgn0038865	CG10824
AAEL011302-RD	2.06245	8.97e-05	annexin	FBgn0000083	AnnIX
AAEL012003-RA	2.06161	0.0013027	Galectin. [Source:Aedes_ManualAnnotation;Acc:AAEL800152]	no homolog
AAEL008345-RA	2.0604	0.000260891	cytochrome P450 [Source:Aedes_ManualAnnotation;Acc:AAEL800304]	FBgn0010019	Cyp4g1
AAEL000252-RA	2.058	0.00464133	hypothetical protein	FBgn0003450	snk
AAEL006206-RA	2.05771	0.00645609	n-twist	FBgn0037937	Fer3
AAEL006920-RA	2.05643	0.000871129	conserved hypothetical protein	no homolog
AAEL013231-RA	2.05585	0.000273265	hypothetical protein	no homolog
AAEL002671-RA	2.0521	0.00330853	conserved hypothetical protein	no homolog
AAEL003050-RA	2.0512	0.0048398	hypothetical protein	no homolog
AAEL002409-RA	2.05112	0.00681869	environmental stress-induced protein, putative	no homolog
AAEL011588-RA	2.04991	0.000114865	conserved hypothetical protein	FBgn0054045	CG34045
AAEL002228-RA	2.04913	9.17e-05	fatty acid synthase	FBgn0040001	CG17374
AAEL010558-RA	2.04773	4.92e-05	conserved hypothetical protein	FBgn0030079	CG7267
AAEL013083-RA	2.0476	6.57e-05	conserved hypothetical protein	FBgn0051431	CG31431
AAEL006824-RA	2.0456	0.000554835	cytochrome P450	FBgn0010019	Cyp4g1
AAEL001071-RA	2.04376	0.000292547	glutathione transferase [Source:Aedes_ManualAnnotation;Acc:AAEL800394]	FBgn0001149	GstD1
AAEL006161-RB	2.04206	0.000217497	Clip-Domain Serine Protease, family B. [Source:Aedes_ManualAnnotation;Acc:AAEL800826]	no homolog
AAEL009771-RA	2.04193	0.00181372	hypothetical protein	no homolog
AAEL001241-RA	2.04123	0.00050873	conserved hypothetical protein	FBgn0032402	CG14945
AAEL005364-RA	2.03911	0.000154326	adaptin, alpha/gamma/epsilon	FBgn0030089	AP-1gamma
AAEL006968-RA	2.03863	8.19e-05	hypothetical protein	no homolog
AAEL010417-RA	2.03782	0.000526326	conserved hypothetical protein	no homolog
AAEL000372-RA	2.03769	0.000133434	myo inositol monophosphatase	FBgn0037063	CG9391
AAEL008376-RA	2.03763	0.00795689	hypothetical protein	no homolog
AAEL006702-RA	2.03756	0.00105724	fibrinogen and fibronectin	no homolog
AAEL009125-RA	2.03537	0.000842382	cytochrome P450 [Source:Aedes_ManualAnnotation;Acc:AAEL800339]	FBgn0039519	Cyp6a18
AAEL013228-RA	2.03426	0.000836439	conserved hypothetical protein	no homolog
AAEL013532-RB	2.03424	0.000774089	hypothetical protein	no homolog
AAEL006344-RB	2.03271	0.000195612	sulfotransferase (sult)	FBgn0034888	CG5431
AAEL004813-RA	2.03203	0.000286282	M-phase phosphoprotein, putative	FBgn0032921	Mpp6
AAEL005548-RA	2.02966	0.00765734	tetraspanin, putative	FBgn0032075	Tsp29Fb
AAEL001094-RB	2.02913	0.000108117	conserved hypothetical protein	FBgn0031037	CG14207
AAEL012252-RA	2.02648	0.000335674	hypothetical protein	FBgn0028531	CG15286
AAEL006130-RA	2.02394	0.00105104	hypothetical protein	no homolog
AAEL006078-RA	2.01977	0.00013668	hypothetical protein	no homolog
AAEL009861-RC	2.019	0.000250436	conserved hypothetical protein	FBgn0034638	CG10433
AAEL007796-RA	2.01881	0.00229548	Clip-Domain Serine Protease, family D. [Source:Aedes_ManualAnnotation;Acc:AAEL800557]	FBgn0036891	CG9372
AAEL000744-RA	2.01742	0.00046453	troponin C	FBgn0010424	TpnC73F
AAEL011623-RA	2.01648	0.000242219	conserved hypothetical protein	FBgn0035636	Cralbp
AAEL004335-RA	2.01561	0.000318751	secreted ferritin G subunit precursor, putative	FBgn0015221	Fer2LCH
AAEL007448-RA	2.01505	0.00684052	dipeptidyl-peptidase	FBgn0031835	CG11319
AAEL003046-RA	2.01102	5.16e-05	saposin	FBgn0000416	Sap-r
AAEL006269-RA	2.00804	0.000147073	conserved hypothetical protein	FBgn0082585	sprt
AAEL011194-RA	2.00416	0.000262276	hypothetical protein	no homolog
AAEL005700-RA	2.00367	4.92e-05	cytochrome P450 [Source:Aedes_ManualAnnotation;Acc:AAEL800287]	FBgn0030369	Cyp318a1
AAEL006982-RA	2.00352	0.000187614	lipase	FBgn0032612	CG13282
AAEL012706-RA	1.99989	0.0023657	conserved hypothetical protein	FBgn0030545	CG11590
AAEL000420-RA	1.99896	0.000249808	cathepsin o	no homolog
AAEL004031-RA	1.99652	0.000929625	conserved hypothetical protein	FBgn0039194	CG13614
AAEL003237-RA	1.99505	0.000284097	low molecular weight protein-tyrosine-phosphatase	FBgn0051469	CG31469
AAEL002776-RA	1.99335	0.000350038	conserved hypothetical protein	FBgn0020439	fau
AAEL008274-RA	1.99262	0.000269697	conserved hypothetical protein	no homolog
AAEL008359-RA	1.98832	0.000848913	hypothetical protein	no homolog
AAEL007365-RA	1.98394	0.00970615	hypothetical protein	no homolog
AAEL010220-RB	1.98275	0.000119157	hypothetical protein	no homolog
AAEL006316-RA	1.98272	6.03e-05	ketohexokinase	FBgn0036942	CG7328
AAEL010523-RA	1.98269	0.00399353	conserved hypothetical protein	FBgn0033484	CG2269
AAEL007667-RA	1.98205	0.0068721	hypothetical protein	FBgn0033987	CG12424
AAEL003347-RB	1.98095	0.00213437	CRAL/TRIO domain-containing protein	FBgn0032783	CG10237
AAEL010334-RA	1.98013	0.000120215	conserved hypothetical protein	no homolog
AAEL007561-RA	1.9764	0.00163243	conserved hypothetical protein	no homolog
AAEL014128-RA	1.97581	0.00440977	hypothetical protein	no homolog
AAEL015533-RA	1.97429	0.000990047	conserved hypothetical protein	no homolog
AAEL007408-RA	1.97328	0.00873523	conserved hypothetical protein	FBgn0053205	CG33205
AAEL008494-RA	1.9716	0.000322221	mitochondrial carrier protein ymc	FBgn0032219	CG4995
AAEL009483-RA	1.97158	3.65e-05	conserved hypothetical protein	FBgn0030309	CG1572
AAEL008819-RA	1.97134	0.000111369	hypothetical protein	no homolog
AAEL000515-RA	1.96786	0.00467411	juvenile hormone-inducible protein, putative	FBgn0031320	CG5126
AAEL001571-RA	1.96781	0.00738766	conserved hypothetical protein	FBgn0085419	Rgk2
AAEL001186-RA	1.96723	8.44e-05	hypothetical protein	no homolog
AAEL000940-RA	1.96705	0.000463325	conserved hypothetical protein	FBgn0085265	CG34236
AAEL004509-RA	1.96477	0.000268373	conserved hypothetical protein	FBgn0031821	CG9542
AAEL011302-RA	1.96447	0.000569962	annexin	FBgn0000083	AnnIX
AAEL005615-RA	1.96423	6.73e-05	conserved hypothetical protein	FBgn0030998	CG14195
AAEL010879-RA	1.96346	0.000127381	conserved hypothetical protein	FBgn0052280	CG32280
AAEL014356-RA	1.96304	0.000258007	C-Type Lectin (CTL) - selectin like. [Source:Aedes_ManualAnnotation;Acc:AAEL800475]	FBgn0030617	CG9095
AAEL007050-RA	1.96231	0.000161966	sugar transporter	no homolog
AAEL000983-RC	1.96225	6.49e-05	clathrin coat assembly protein ap19	FBgn0039132	AP-1sigma
AAEL015654-RA	1.96192	0.000178756	cytochrome P450 [Source:Aedes_ManualAnnotation;Acc:AAEL800324]	FBgn0031689	Cyp28d1
AAEL003567-RA	1.96176	0.00665949	conserved hypothetical protein	no homolog
AAEL003301-RA	1.95952	0.00202492	MRAS2, putative	FBgn0040370	CG13375
AAEL009128-RA	1.95906	0.00123125	cytochrome P450 [Source:Aedes_ManualAnnotation;Acc:AAEL800342]	FBgn0039519	Cyp6a18
AAEL004220-RA	1.95899	0.0021573	hypothetical protein	no homolog
AAEL013714-RA	1.95747	0.00194359	trypsin, putative	FBgn0015316	Try29F
AAEL009556-RA	1.95349	0.000638999	Niemann-Pick Type C-2, putative	FBgn0037782	Npc2d
AAEL000505-RA	1.9518	0.000170924	conserved hypothetical protein	FBgn0031320	CG5126
AAEL007133-RA	1.95069	0.00994519	conserved hypothetical protein	no homolog
AAEL000314-RA	1.95021	0.000147073	malate dehydrogenase	FBgn0037057	CG10512
AAEL007057-RA	1.94827	0.00158849	retinoid-inducible serine carboxypeptidase (serine carboxypeptidase	FBgn0035154	CG3344
AAEL011178-RA	1.94823	0.00353072	posterior sex combs protein	FBgn0005624	Psc
AAEL003347-RA	1.94659	0.00159688	CRAL/TRIO domain-containing protein	FBgn0032783	CG10237
AAEL003426-RA	1.94477	0.00243952	sodium-dependent phosphate transporter	FBgn0016684	NaPi-T
AAEL004672-RA	1.94441	0.000372881	conserved hypothetical protein	no homolog
AAEL013683-RA	1.94371	0.000416535	conserved hypothetical protein	FBgn0030394	Cpr11A
AAEL014570-RA	1.94323	0.00295332	oviductin	FBgn0034661	CG4386
AAEL001548-RA	1.94289	0.000953594	glucosyl/glucuronosyl transferases	FBgn0040260	Ugt36Bc
AAEL002031-RA	1.9426	0.000286385	cytochrome P450 [Source:Aedes_ManualAnnotation;Acc:AAEL800243]	FBgn0038681	Cyp12a4
AAEL002254-RA	1.94211	0.000165909	conserved hypothetical protein	no homolog
AAEL002332-RA	1.94184	0.000534794	hypothetical protein	no homolog
AAEL003072-RA	1.93946	0.00773254	hypothetical protein	no homolog
AAEL007830-RA	1.93914	8.44e-05	cytochrome P450 [Source:Aedes_ManualAnnotation;Acc:AAEL800307]	FBgn0015034	Cyp4e1
AAEL000086-RA	1.93846	0.001682	Clip-Domain Serine Protease, family B. [Source:Aedes_ManualAnnotation;Acc:AAEL800827]	no homolog
AAEL004249-RB	1.93672	0.000534794	conserved hypothetical protein	FBgn0005633	fln
AAEL006987-RA	1.9367	0.00625463	conserved hypothetical protein	no homolog
AAEL001312-RA	1.93547	8.44e-05	cytochrome P450 [Source:Aedes_ManualAnnotation;Acc:AAEL800386]	no homolog
AAEL003969-RA	1.93291	0.00194283	leukocyte receptor tyrosine protein kinase	FBgn0040505	Alk
AAEL004575-RA	1.93279	0.000371262	beta-galactosidase	no homolog
AAEL005733-RA	1.93271	0.00177133	myosin heavy chain, nonmuscle or smooth muscle	FBgn0086783	Mhc
AAEL013324-RA	1.93243	0.00293621	high affinity nuclear juvenile hormone binding protein, putative	FBgn0038394	CG10264
AAEL012184-RA	1.93176	0.000381695	glutaminyl-peptide cyclotransferase	FBgn0052412	CG32412
AAEL002576-RA	1.93115	0.00202651	sodium/solute symporter	FBgn0038652	CG7720
AAEL009162-RA	1.93089	0.000166189	hypothetical protein	no homolog
AAEL005790-RA	1.93022	0.000334233	malic enzyme	FBgn0002719	Men
AAEL002735-RA	1.92683	0.00485613	sodium/hydrogen exchanger 7, 9 (nhe7, nhe9)	FBgn0028703	Nhe3
AAEL011217-RA	1.92667	0.000539678	conserved hypothetical protein	FBgn0035517	CG1265
AAEL008471-RA	1.92654	3.1e-05	hypothetical protein	no homolog
AAEL010656-RA	1.92574	0.000222228	conserved hypothetical protein	no homolog
AAEL003636-RA	1.92452	7.33e-05	hypothetical protein	FBgn0026239	gukh
AAEL000663-RA	1.92319	4.7e-05	conserved hypothetical protein	FBgn0036502	CG7841
AAEL007796-RB	1.9229	0.00385938		no_info
AAEL011148-RA	1.92274	0.000509561	hypothetical protein	no homolog
AAEL010768-RA	1.92242	0.000133434	conserved hypothetical protein	FBgn0032149	CG4036
AAEL011846-RA	1.92148	0.00587862	hypothetical protein	no homolog
AAEL012783-RA	1.92087	3.79e-05	protease m1 zinc metalloprotease	FBgn0051233	CG31233
AAEL003963-RA	1.92074	0.000111369	calpain 4, 6, 7, invertebrate	FBgn0025866	CalpB
AAEL009837-RA	1.91937	0.000509561	hypothetical protein	no homolog
AAEL008599-RA	1.91874	0.000631613	zinc carboxypeptidase	FBgn0032144	CG17633
AAEL003422-RA	1.91808	0.00294916	hypothetical protein	no homolog
AAEL011983-RA	1.91791	0.000315638	scaffold protein salvador (shar-pei)	FBgn0053193	sav
AAEL009216-RA	1.91771	0.000281857	cAMP-dependent protein kinase type ii regulatory subunit	FBgn0022382	Pka-R2
AAEL006095-RB	1.91759	0.000118231	Gelsolin precursor	no homolog
AAEL015567-RA	1.91639	0.00596724	odorant-binding protein 58c, putative	no homolog
AAEL009629-RA	1.91276	0.000135875	endoU protein, putative	FBgn0030251	CG2145
AAEL010511-RA	1.91231	0.000517392	conserved hypothetical protein	FBgn0037000	CG5130
AAEL010194-RA	1.90996	0.00527211	hypothetical protein	no homolog
AAEL010222-RB	1.90972	0.000376436	transcription factor GATA-4 (GATA binding factor-4)	no homolog
AAEL012012-RA	1.90931	0.000121679	conserved hypothetical protein	FBgn0035431	CG14968
AAEL013327-RA	1.90894	0.00385397	conserved hypothetical protein	FBgn0037290	CG1124
AAEL014456-RA	1.90869	0.000317	hypothetical protein	no homolog
AAEL008157-RA	1.90699	0.000274477	conserved hypothetical protein	FBgn0042102	CG18745
AAEL006978-RA	1.90574	3.17e-05	protein-glutamine gamma-glutamyltransferase	FBgn0031975	Tg
AAEL013321-RA	1.90524	0.000110674	conserved hypothetical protein	FBgn0030659	CG9215
AAEL013214-RA	1.90439	0.000252983	cgmp-dependent protein kinase	FBgn0032187	CG4839
AAEL009173-RA	1.90238	0.00530721	fasciclin ii (fas ii)	FBgn0000635	Fas2
AAEL000216-RA	1.89744	0.00257681	elongase, putative	FBgn0037763	CG16904
AAEL000566-RA	1.89649	0.00111099	conserved hypothetical protein	FBgn0034741	CG4269
AAEL003547-RA	1.89611	0.00830377	hypothetical protein	FBgn0033866	CG6280
AAEL013486-RA	1.89528	0.000103255	hypothetical protein	no homolog
AAEL007948-RA	1.89499	0.00222634	glutathione transferase [Source:Aedes_ManualAnnotation;Acc:AAEL800404]	no homolog
AAEL002688-RA	1.89419	0.000568834	glucosyl/glucuronosyl transferases	FBgn0032713	CG17323
AAEL005558-RA	1.89269	0.000613051	conserved hypothetical protein	FBgn0021872	Xbp1
AAEL004761-RA	1.89249	0.000311677	serine/threonine-protein kinase MAK	FBgn0051711
AAEL013571-RA	1.89167	5.43e-05	synaptobrevin	FBgn0003660	Syb
AAEL005694-RA	1.89096	0.000622403	conserved hypothetical protein	FBgn0013307	Odc1
AAEL013776-RA	1.89013	0.00187252	predicted protein	no homolog
AAEL002572-RA	1.88957	0.000353084	myosin regulatory light chain 2 (mlc-2)	FBgn0002773	Mlc2
AAEL006011-RA	1.88866	0.000381695	conserved hypothetical protein	no homolog
AAEL011740-RA	1.88704	0.000757904	hypothetical protein	FBgn0036979	CG13247
AAEL011350-RA	1.88671	1.88e-05	hypothetical protein	no homolog
AAEL005793-RA	1.88629	0.00241172	AMP dependent ligase	FBgn0000527	e
AAEL014552-RA	1.88604	0.00402014	Glutamate receptor binding protein, putative	FBgn0029830	Grip
AAEL005788-RA	1.88277	0.00158514	cytochrome P450 [Source:Aedes_ManualAnnotation;Acc:AAEL800264]	FBgn0037601	Cyp313b1
AAEL010405-RA	1.88258	0.00048929	alkyldihydroxyacetonephosphate synthase	FBgn0033983	CG10253
AAEL011943-RA	1.87757	0.00404035	hairy protein	FBgn0001168	h
AAEL011400-RA	1.87568	0.00590893	conserved hypothetical protein	no homolog
AAEL012940-RA	1.87554	0.000291076	hypothetical protein	no homolog
AAEL002269-RA	1.87299	0.000166419	purine nucleoside phosphorylase	FBgn0035348	CG16758
AAEL004384-RA	1.87207	0.000119036	hypothetical protein	no homolog
AAEL008629-RA	1.87101	0.000623906	ABC transporter	FBgn0031516	CG9663
AAEL001641-RA	1.86987	0.000427339	deoxyribonuclease I, putative	no homolog
AAEL006607-RA	1.86983	0.00118446	juvenile hormone-inducible protein, putative	FBgn0032913	CG9259
AAEL004715-RA	1.86909	0.00366511	b-cell translocation protein	FBgn0028397	Tob
AAEL000658-RA	1.86876	0.00104651	conserved hypothetical protein	no homolog
AAEL005043-RA	1.86414	0.000609229	ATP-dependent bile acid permease	FBgn0032456	MRP
AAEL003766-RA	1.8636	0.000456662	hypothetical protein	FBgn0038611	CG14309
AAEL005120-RA	1.86342	0.000284323	zinc finger protein	FBgn0033782	sug
AAEL013430-RA	1.86246	6.62e-05	hypothetical protein	FBgn0036742	CG7497
AAEL003640-RA	1.86245	0.000843318	sodium/chloride dependent amino acid transporter	no homolog
AAEL002309-RA	1.86241	0.000579256	Thioredoxin Peroxidase. [Source:Aedes_ManualAnnotation;Acc:AAEL800498]	FBgn0033521	CG12896
AAEL007092-RA	1.86032	0.000242843	conserved hypothetical protein	FBgn0016031	lama
AAEL010171-RA	1.86019	0.000231926	Peptidoglycan Recognition Protein (Long) [Source:Aedes_ManualAnnotation;Acc:AAEL800179]	FBgn0037906	PGRP-LB
AAEL004027-RA	1.85968	0.000845827	glucose dehydrogenase	FBgn0030594	CG9509
AAEL009215-RA	1.85907	0.00894297	hypothetical protein	no homolog
AAEL008588-RA	1.85883	0.000290977	innexin	FBgn0027106	inx7
AAEL006044-RA	1.85859	0.000172019	cytochrome P450 [Source:Aedes_ManualAnnotation;Acc:AAEL800274]	FBgn0037601	Cyp313b1
AAEL011369-RA	1.85646	1.85e-05	endothelin-converting enzyme	FBgn0031081	Nep3
AAEL012578-RA	1.85539	0.000388574	phosphoserine aminotransferase	FBgn0014427	CG11899
AAEL004264-RA	1.85481	1.52e-05	conserved hypothetical protein	no homolog
AAEL010144-RA	1.85472	0.00121979		FBgn0051619	CG31619
AAEL003899-RA	1.85427	0.00025881	sugar transporter	no homolog
AAEL009270-RA	1.85393	0.00731853	hypothetical protein	no homolog
AAEL001295-RA	1.85301	0.00753548	conserved hypothetical protein	no homolog
AAEL005336-RA	1.85184	0.000339117	d-3-phosphoglycerate dehydrogenase	FBgn0032350	CG6287
AAEL006387-RA	1.84921	0.00305715	conserved hypothetical protein	no homolog
AAEL002982-RA	1.84793	0.00438589	matrix metalloproteinase	no homolog
AAEL006674-RA	1.84692	0.000222054	Clip-Domain Serine Protease, family B. [Source:Aedes_ManualAnnotation;Acc:AAEL800824]	no homolog
AAEL010661-RA	1.84626	0.000297041	phospholipid scramblase 1,	FBgn0052056	scramb1
AAEL000778-RA	1.84535	0.00210447	conserved hypothetical protein	no homolog
AAEL006580-RA	1.84506	0.0013225	conserved hypothetical protein	FBgn0035517	CG1265
AAEL005345-RA	1.84318	0.000583151	transcription factor castor (protein ming)	FBgn0004878	cas
AAEL014246-RA	1.84314	0.00216043	glucosyl/glucuronosyl transferases	FBgn0034605	CG15661
AAEL007096-RA	1.84259	0.0095736	conserved hypothetical protein	FBgn0035328	yellow-g2
AAEL004522-RA	1.84119	0.000183916	Gambicin, Anti-Microbial Peptide. [Source:Aedes_ManualAnnotation;Acc:AAEL800433]	no homolog
AAEL007364-RA	1.83989	0.00335669	7,8-dihydro-8-oxoguanine-triphosphatase, putative	FBgn0037911	CG10898
AAEL005676-RA	1.83814	0.000101552	adenosine deaminase	FBgn0036752	Adgf-A
AAEL012255-RA	1.83718	0.00292807	conserved hypothetical protein	no homolog
AAEL006784-RA	1.83698	0.00663947	cytochrome P450 [Source:Aedes_ManualAnnotation;Acc:AAEL800364]	no homolog
AAEL001835-RA	1.83575	0.00100975	sodium/solute symporter	no homolog
AAEL011828-RA	1.83549	0.00137263	hypothetical protein	no homolog
AAEL009669-RA	1.83542	0.00184615	conserved hypothetical protein	no homolog
AAEL006873-RA	1.83462	0.000163841	hypothetical protein	no homolog
AAEL000027-RA	1.83448	0.0095614	conserved hypothetical protein	FBgn0036907
AAEL002644-RA	1.83435	0.000874414	conserved hypothetical protein	no homolog
AAEL010802-RB	1.83382	0.00170789	conserved hypothetical protein	no homolog
AAEL006806-RA	1.82972	0.000161073	atrial natriuretic peptide receptor	FBgn0051183	CG31183
AAEL002908-RA	1.8287	0.00338054	hypothetical protein	no homolog
AAEL007547-RA	1.8287	0.000230203	chloride channel protein	FBgn0033755	CG8594
AAEL009421-RA	1.82658	0.000507198	cyclophilin-r	FBgn0002936	ninaA
AAEL003337-RA	1.82643	0.00843691	conserved hypothetical protein	no homolog
AAEL008007-RA	1.82641	0.00121886	conserved hypothetical protein	no homolog
AAEL008859-RA	1.82566	0.00857308	adenylate cyclase	FBgn0004852	Ac76E
AAEL001625-RA	1.82389	0.000700376	conserved hypothetical protein	FBgn0029580	CG14778
AAEL008092-RA	1.82314	0.000907427	hypothetical protein	FBgn0039807	CG15546
AAEL003881-RA	1.82163	0.000814839	anopheles stephensi ubiquitin, putative	FBgn0003943	Ubi-p63E
AAEL004547-RB	1.82155	0.000859345	conserved hypothetical protein	no homolog
AAEL012864-RA	1.82139	0.000198109	conserved hypothetical protein	no homolog
AAEL004616-RA	1.82065	9.78e-05	actin	FBgn0011743	Arp53D
AAEL005179-RA	1.82004	0.00567564	hypothetical protein	no homolog
AAEL007027-RA	1.81856	0.000679525	sodium/solute symporter	FBgn0051090
AAEL002869-RA	1.81768	0.000347571	conserved hypothetical protein	FBgn0051195	CG31195
AAEL004805-RA	1.81462	0.00052335	potassium-dependent sodium-calcium exchanger, putative	no homolog
AAEL004676-RA	1.81452	0.000164151	(s)-2-hydroxy-acid oxidase	FBgn0061356	CG18003
AAEL011112-RC	1.81403	0.000548026	alcohol dehydrogenase	FBgn0022359	Sodh-2
AAEL004242-RA	1.81324	5.16e-05	juvenile hormone-inducible protein, putative	FBgn0030317	CG1561
AAEL000601-RA	1.81284	0.00111724	hypothetical protein	no homolog
AAEL011180-RA	1.81213	8.74e-05	conserved hypothetical protein	no homolog
AAEL001331-RA	1.8112	0.000226821	mannose-1-phosphate guanyltransferase	FBgn0037279	CG1129
AAEL002638-RA	1.81119	0.000120793	cytochrome P450 [Source:Aedes_ManualAnnotation;Acc:AAEL800380]	no homolog
AAEL001586-RA	1.81092	8.69e-05	glucosyl/glucuronosyl transferases	FBgn0040260	Ugt36Bc
AAEL000551-RA	1.81091	0.000733839	hypothetical protein	no homolog
AAEL003123-RA	1.81089	0.00100311	deoxyribonuclease I, putative	FBgn0039592	CG14062
AAEL006879-RB	1.81061	0.000178231	folate carrier protein	FBgn0033391	CG8026
AAEL007765-RB	1.81047	0.000543277	Serine Protease Inhibitor (serpin), likely cleavage at K/R. Transcript A. [Source:Aedes_ManualAnnotation;Acc:AAEL800215]	FBgn0028983	Spn6
AAEL008857-RA	1.8104	0.000676309	deoxyribonuclease I, putative	FBgn0039592	CG14062
AAEL013301-RA	1.81006	0.000786216	conserved hypothetical protein	no homolog
AAEL006131-RA	1.80859	0.00203737	hypothetical protein	no homolog
AAEL002670-RA	1.8076	2.42e-05	AMP dependent ligase	FBgn0033733	CG8834
AAEL008657-RA	1.80186	0.000842327	midline fasciclin	FBgn0024211
AAEL003589-RA	1.80094	0.000814839	transcription factor, putative	no homolog
AAEL012691-RA	1.79883	0.000178231	sodium/solute symporter	FBgn0037895	CG6723
AAEL003247-RA	1.79634	0.000360751		FBgn0051392	CG31392
AAEL005296-RA	1.79594	0.000863012	conserved hypothetical protein	FBgn0023550	CG18031
AAEL013867-RA	1.7958	0.000380759	beta-mannosidase	FBgn0037215	CG12582
AAEL000687-RA	1.7953	0.00103843	glucosyl/glucuronosyl transferases	FBgn0032713	CG17323
AAEL007298-RB	1.79495	0.00043952	conserved hypothetical protein	FBgn0034145	CG5065
AAEL002999-RA	1.79491	0.000174492	GTPase_rho	FBgn0083940	CG34104
AAEL012531-RA	1.79488	0.00375363	tetraspanin, putative	FBgn0032075	Tsp29Fb
AAEL015078-RA	1.79425	0.00607929	conserved hypothetical protein	FBgn0039879	Ir100a
AAEL010975-RA	1.79412	0.000283474	paramyosin, long form	FBgn0003149	Prm
AAEL015487-RA	1.79394	0.000200897	zinc finger protein, putative	FBgn0005771	noc
AAEL010452-RA	1.79383	0.00455589	conserved hypothetical protein	no homolog
AAEL004090-RA	1.79381	0.000398249	conserved hypothetical protein	FBgn0032699	CG10383
AAEL005523-RA	1.7933	0.00894703	Selenoprotein G, putative	no homolog
AAEL013853-RA	1.7931	0.000652715	C-Type Lectin (CTL) - galactose binding. [Source:Aedes_ManualAnnotation;Acc:AAEL800458]	FBgn0038017	CG4115
AAEL001074-RA	1.79258	0.00293621	cadherin	no homolog
AAEL013411-RA	1.79157	0.00142267	hypothetical protein	no homolog
AAEL012819-RA	1.79134	0.000334233	vacuolar ATP synthase subunit g	FBgn0026753	Vha13
AAEL013602-RA	1.79037	0.00189481	laminin gamma-3 chain	FBgn0034070	SP2353
AAEL009951-RA	1.7898	0.000295169	dimeric dihydrodiol dehydrogenase	FBgn0031418	CG3609
AAEL006866-RA	1.78951	0.00180506	muscle lim protein	FBgn0014863	Mlp84B
AAEL002071-RA	1.78823	6.78e-05	cytochrome P450 [Source:Aedes_ManualAnnotation;Acc:AAEL800253]	FBgn0036910	Cyp305a1
AAEL000340-RA	1.78823	0.00244699	cytochrome P450	FBgn0038005	Cyp313a5
AAEL001969-RA	1.78752	0.000726286	protein serine/threonine kinase, putative	FBgn0011695	PebIII
AAEL005803-RA	1.78739	0.000605281	hypothetical protein	FBgn0038874	ETHR
AAEL006630-RA	1.78683	0.000562007	conserved hypothetical protein	FBgn0053510	CG33510
AAEL006000-RA	1.78642	0.00507148	conserved hypothetical protein	FBgn0085201	CG34172
AAEL005950-RC	1.78552	0.000859345	chloride channel protein 2	FBgn0051116	CG31116
AAEL013637-RA	1.78439	0.00940772	homogentisate 1,2-dioxygenase	FBgn0040211	hgo
AAEL001639-RA	1.78419	0.000147423	conserved hypothetical protein	FBgn0034530	Rcd6
AAEL007293-RA	1.78407	0.000377815	cAMP-dependent protein kinase catalytic subunit	FBgn0000273	Pka-C1
AAEL012069-RC	1.78354	0.00528594		no_info
AAEL006090-RB	1.78255	0.000157206	Gelsolin precursor	no homolog
AAEL006483-RA	1.78231	0.00162307	conserved hypothetical protein	no homolog
AAEL006476-RA	1.7822	0.00144279	symbol, putative	FBgn0005771	noc
AAEL000769-RA	1.78091	0.00469847	arginine/serine-rich splicing factor	no homolog
AAEL009219-RA	1.77997	0.000544708	predicted protein	FBgn0050263	CG30263
AAEL004513-RA	1.77925	0.000260682	neurotransmitter gated ion channel	FBgn0029733	CG6927
AAEL006609-RA	1.77872	0.000351565	zinc finger protein	FBgn0043364	cbt
AAEL013433-RA	1.77819	0.00309875	Spaetzle-like cytokine. [Source:Aedes_ManualAnnotation;Acc:AAEL800590]	FBgn0003495	spz
AAEL002075-RA	1.7761	0.00842896	conserved hypothetical protein	no homolog
AAEL012556-RA	1.77596	7.08e-05	Ofd1 protein, putative	FBgn0031251	CG4213
AAEL007403-RA	1.77587	0.000977649	conserved hypothetical protein	no homolog
AAEL009477-RB	1.77469	0.000110674	hypothetical protein	FBgn0015336	CG15865
AAEL013490-RA	1.77467	0.000183916	conserved hypothetical protein	FBgn0033665	CG13189
AAEL006815-RA	1.77412	0.00100386	cytochrome P450 [Source:Aedes_ManualAnnotation;Acc:AAEL800363]	no homolog
AAEL003603-RA	1.77385	0.000754836	transcription factor, putative	no homolog
AAEL005733-RB	1.77377	0.00157983	myosin heavy chain, nonmuscle or smooth muscle	FBgn0086783	Mhc
AAEL009627-RA	1.77309	5.16e-05	hypothetical protein	no homolog
AAEL013821-RA	1.77287	0.00128461	xylulose kinase	FBgn0038463	CG3534
AAEL010479-RA	1.77141	0.00264373	sugar transporter	FBgn0037387	CG1213
AAEL003550-RA	1.7708	0.000236943	aquaporin	FBgn0033635	CG7777
AAEL006000-RC	1.76954	0.00579195	conserved hypothetical protein	FBgn0085201	CG34172
AAEL013263-RA	1.76946	0.00136487	high affinity copper transporter, putative	FBgn0062412	Ctr1B
AAEL012380-RA	1.76895	0.0007985	Peptidoglycan Recognition Protein (Long) [Source:Aedes_ManualAnnotation;Acc:AAEL800178]	FBgn0035975	PGRP-LA
AAEL014847-RA	1.768	0.000762605	innexin	FBgn0027108	inx2
AAEL002559-RA	1.76778	0.000100641	conserved hypothetical protein	FBgn0051028	CG31028
AAEL005112-RA	1.7676	0.00159504		FBgn0000326	clt
AAEL000651-RA	1.76603	0.000717021	alpha-amylase	FBgn0033297	CG8690
AAEL008213-RA	1.76601	2.66e-05	mitochondrial carrier protein	no homolog
AAEL004580-RA	1.76463	0.00101462	beta-galactosidase	FBgn0001089	Gal
AAEL006000-RD	1.76428	0.00529134	conserved hypothetical protein	FBgn0085201	CG34172
AAEL003499-RA	1.76403	0.000156879	calsyntenin-1 precursor	FBgn0039928	cals
AAEL000563-RA	1.76252	0.00660409	C-Type Lectin (CTL) - mannose binding. [Source:Aedes_ManualAnnotation;Acc:AAEL800472]	FBgn0033067	CG11211
AAEL013899-RA	1.76205	0.000120166	protease m1 zinc metalloprotease	FBgn0038897	CG5849
AAEL006781-RA	1.76171	0.00530721	hypothetical protein	no homolog
AAEL011520-RA	1.76155	0.000164946	sucrose transport protein	FBgn0035968	CG4484
AAEL011130-RA	1.76149	0.00202653	alcohol dehydrogenase	no homolog
AAEL005248-RA	1.76129	2.66e-05	conserved hypothetical protein	FBgn0027655	htt
AAEL003186-RA	1.76095	0.0022504	hypothetical protein	no homolog
AAEL005868-RA	1.76084	0.000547083	hypothetical protein	no homolog
AAEL006835-RA	1.76065	0.000682723	transient receptor potential cation channel protein painless	FBgn0060296	pain
AAEL010356-RA	1.76044	0.000842382	phosphopentothenoylcysteine decarboxylase	FBgn0050290	Ppcdc
AAEL001866-RA	1.75901	0.000119036	hypothetical protein	no homolog
AAEL004209-RA	1.75876	0.00827647	opioid-binding protein/cell adhesion molecule, putative	FBgn0034723	CG13506
AAEL001771-RA	1.75861	0.000392912	toll	no homolog
AAEL005656-RA	1.75739	0.000123407	myosin heavy chain, nonmuscle or smooth muscle	FBgn0086783	Mhc
AAEL002134-RA	1.75702	0.00081318	conserved hypothetical protein	FBgn0038545	CG7713
AAEL005460-RA	1.75629	0.00218908	alpha-galactosidase/alpha-n-acetylgalactosaminidase	FBgn0032192	CG5731
AAEL010887-RA	1.75591	0.00636689	hypothetical protein	no homolog
AAEL007768-RA	1.7555	0.000388574	TOLL pathway signalling. [Source:Aedes_ManualAnnotation;Acc:AAEL800487]	FBgn0033402	Myd88
AAEL005699-RB	1.7545	0.000353084	membrane protein tms1d	FBgn0028399	TMS1
AAEL003114-RA	1.75384	0.000610258	conserved hypothetical protein	no homolog
AAEL005444-RA	1.75383	0.000178231	pyrokinin, putative	FBgn0039722	capa
AAEL010348-RA	1.75376	0.000462115	sugar transporter	no homolog
AAEL009910-RA	1.75351	3.1e-05	conserved hypothetical protein	FBgn0036044	CG14168
AAEL009477-RA	1.75265	0.000171741	hypothetical protein	FBgn0015336	CG15865
AAEL010596-RA	1.75235	0.000360751	n-acetylgalactosaminyltransferase	FBgn0039596	CG10000
AAEL003223-RA	1.75165	0.00355024	hypothetical protein	no homolog
AAEL001159-RA	1.75135	0.000190034	ribonuclease t2	FBgn0010406	RNaseX25
AAEL005517-RA	1.75124	0.000814839	hypothetical protein	no homolog
AAEL005491-RA	1.75111	0.00024647	ABC transporter	FBgn0053970	CG33970
AAEL009115-RA	1.75045	0.00342423	hypothetical protein	no homolog
AAEL011325-RA	1.75033	0.000389465	gonadotropin-releasing hormone receptor	FBgn0025595	GRHR
AAEL008241-RA	1.75014	0.00110133	conserved hypothetical protein	FBgn0083945	CG34109
AAEL003192-RA	1.74969	0.000412093	mfs transporter	FBgn0038938	CG7084
AAEL006186-RA	1.74896	0.000129184	conserved hypothetical protein	no homolog
AAEL012684-RA	1.74644	0.000317	conserved hypothetical protein	FBgn0047135	CG32276
AAEL000298-RA	1.7449	0.00113332	sodium/chloride dependent amino acid transporter	FBgn0034911	CG5549
AAEL004516-RA	1.74445	0.000959347	conserved hypothetical protein	no homolog
AAEL005052-RB	1.74394	0.000277892	tubulin beta chain	FBgn0052396	CG32396
AAEL015276-RA	1.74373	0.00534059	conserved hypothetical protein	FBgn0031707	CG14020
AAEL004307-RB	1.74269	0.000172296	n-myc downstream regulated	FBgn0043070	MESK2
AAEL010478-RA	1.74157	0.00178958	sugar transporter	no homolog
AAEL006507-RA	1.74135	0.000403442	conserved hypothetical protein	FBgn0035537	CG11342
AAEL006377-RA	1.74104	0.000832062	conserved hypothetical protein	no homolog
AAEL001656-RA	1.74101	0.000958234	sodium-dependent phosphate transporter	FBgn0010497	l(2)01810
AAEL014170-RA	1.74057	0.000897618	hypothetical protein	no homolog
AAEL007913-RA	1.73999	0.00701901	sulfotransferase (sult)	no homolog
AAEL005699-RA	1.7384	0.000579256	membrane protein tms1d	FBgn0028399	TMS1
AAEL001503-RA	1.73688	0.00200515	sodium/hydrogen exchanger 3 (nhe3)	FBgn0040297	Nhe2
AAEL012982-RA	1.73406	0.0011885	sugar transporter	FBgn0051530	CG31530
AAEL006927-RA	1.73356	0.000705117	hypothetical protein	FBgn0040601	CG13643
AAEL005385-RA	1.73027	0.00142897	hypothetical protein	no homolog
AAEL006443-RA	1.73023	0.000427339	hypothetical protein	no homolog
AAEL006095-RA	1.72945	0.00205007	Gelsolin precursor	no homolog
AAEL002553-RA	1.72746	0.00493616	hypothetical protein	FBgn0039748	CG15529
AAEL008749-RA	1.72669	0.00897374	udp-glucuronosyltransferase	FBgn0036842	CG3797
AAEL007546-RA	1.72616	8.44e-05	actin-related protein 2/3 complex subunit 1A	FBgn0001961	Sop2
AAEL001235-RA	1.7234	0.000877381	palmitoyl-protein thioesterase	FBgn0032358	Ppt2
AAEL005353-RA	1.72215	9.45e-05	conserved hypothetical protein	no homolog
AAEL007807-RA	1.72196	0.000289289	cytochrome P450 [Source:Aedes_ManualAnnotation;Acc:AAEL800302]	FBgn0005670	Cyp4d1
AAEL009188-RA	1.72175	0.000814445	hypothetical protein	no homolog
AAEL002833-RA	1.71948	0.000150237	cathepsin l	FBgn0013770	Cp1
AAEL010819-RA	1.71924	8.74e-05	vacuolar ATP synthase subunit H	FBgn0028663	VhaM9.7-2
AAEL008262-RA	1.71855	0.000101842	ppa (fragment)	FBgn0020257	ppa
AAEL013689-RA	1.718	0.000314063	neuronal calcium sensor, putative	no homolog
AAEL009836-RA	1.71778	0.00058665	conserved hypothetical protein	no homolog
AAEL001128-RA	1.71763	0.00224358	AMP dependent coa ligase	no homolog
AAEL003212-RA	1.71737	0.000120215	protease m1 zinc metalloprotease	FBgn0038897	CG5849
AAEL004009-RA	1.71347	0.000717021	glucose dehydrogenase	FBgn0030587	CG9522
AAEL006872-RA	1.71335	3.65e-05	calponin/transgelin	FBgn0002789	Mp20
AAEL014276-RA	1.71306	0.00499982	conserved hypothetical protein	FBgn0034430	mip40
AAEL001232-RA	1.71283	0.00128461	tubulointerstitial nephritis antigen	FBgn0034709	CG3074
AAEL013609-RA	1.71245	0.000318751	Stromal interaction molecule, putative	FBgn0045073	Stim
AAEL003318-RA	1.71229	6.03e-05	oligopeptide transporter	FBgn0028491	CG2930
AAEL013613-RA	1.71178	0.000226821	pyruvate dehydrogenase	FBgn0028325	l(1)G0334
AAEL004845-RA	1.71066	0.000171741	conserved hypothetical protein	FBgn0038056	CG5961
AAEL002457-RA	1.71026	0.000883886	conserved hypothetical protein	FBgn0086367	t
AAEL008219-RA	1.70994	0.000311677	elongase, putative	no homolog
AAEL001724-RA	1.70921	0.00104261	GPCR Orphan/Putative Class B Family [Source:Aedes_ManualAnnotation;Acc:AAEL800774]	no homolog
AAEL001002-RA	1.70902	0.00913477	sodium/solute symporter	FBgn0035293	CG5687
AAEL012632-RA	1.70849	0.000147073	hypothetical protein	no homolog
AAEL005743-RA	1.70601	0.000141121	conserved hypothetical protein	FBgn0032330	Samuel
AAEL006696-RA	1.70465	0.00303576	lumbrokinase-3T2, putative	FBgn0033277	CG14760
AAEL002067-RA	1.70462	0.00230677	cytochrome P450	no homolog
AAEL009748-RA	1.70348	0.000107741	2-hydroxyphytanoyl-coa lyase	FBgn0034488	CG11208
AAEL001513-RA	1.70315	2.74e-05	WD-repeat protein	FBgn0035264	Oseg4
AAEL011371-RA	1.70282	0.00428457	conserved hypothetical protein	FBgn0016076	vri
AAEL001323-RA	1.70268	0.00024647	conserved hypothetical protein	FBgn0053680	CG33680
AAEL003894-RA	1.7024	0.0010142	Gram-Negative Binding Protein (GNBP), or Beta-1,3-Glucan Binding Protein (BGBP). [Source:Aedes_ManualAnnotation;Acc:AAEL800164]	FBgn0040323	GNBP1
AAEL009074-RA	1.70118	7.85e-05	Inhibitor of Apoptosis (IAP), containing Baculoviral IAP Repeat(s) (BIR domains). [Source:Aedes_ManualAnnotation;Acc:AAEL800166]	FBgn0003691
AAEL009470-RA	1.69821	0.000369635	conserved hypothetical protein	FBgn0030973	CG7332
AAEL009124-RA	1.69809	0.00407476	cytochrome P450 [Source:Aedes_ManualAnnotation;Acc:AAEL800345]	FBgn0033304	Cyp6a13
AAEL004583-RA	1.69778	0.000675667	conserved hypothetical protein	FBgn0052234
AAEL013337-RA	1.69763	0.00171167	conserved hypothetical protein	FBgn0038170	CG14367
AAEL010206-RA	1.69704	0.00215932	xylulose kinase	FBgn0038463	CG3534
AAEL002457-RB	1.69678	0.000822871	conserved hypothetical protein	FBgn0086367	t
AAEL006973-RA	1.69668	0.000826626	ubiquitin conjugating enzyme 7 interacting protein	no homolog
AAEL000845-RA	1.69584	0.00845768	protein-tyrosine phosphatase	FBgn0034085	Ptp52F
AAEL004350-RA	1.69556	5.43e-05	janus A, putative	FBgn0001280	janA
AAEL003713-RA	1.6954	0.000484093	leucine-rich transmembrane protein	FBgn0034602	CG15658
AAEL007102-RA	1.69536	0.00134977	trypsin, putative	no homolog
AAEL008408-RA	1.6947	0.000118725	conserved hypothetical protein	FBgn0025624	CG4025
AAEL011036-RA	1.69343	0.00284899	conserved hypothetical protein	no homolog
AAEL008211-RA	1.69294	5.16e-05	mitochondrial carrier protein	no homolog
AAEL001146-RA	1.69285	7.89e-05	n-acetylgalactosaminyltransferase	FBgn0050463	CG30463
AAEL012687-RA	1.69283	0.00061762	juvenile hormone-inducible protein, putative	no homolog
AAEL005338-RA	1.69281	0.00733628	novex-3 (titin isoform)	no homolog
AAEL012102-RA	1.69242	0.00380894	conserved hypothetical protein	FBgn0037360	CG2182
AAEL009915-RA	1.69142	0.00635103	centrosomal protein	FBgn0039152	CG6129
AAEL006869-RA	1.69076	8.78e-06	hypothetical protein	no homolog
AAEL011996-RA	1.68983	0.000947306	conserved hypothetical protein	no homolog
AAEL000819-RA	1.68889	0.00924883	hypothetical protein	no homolog
AAEL010864-RA	1.68879	0.000211811	TRP-phosphatase, putative	FBgn0029713	CG11436
AAEL006648-RA	1.68766	0.000115673	pantothenate kinase	FBgn0031682	CG5828
AAEL003224-RA	1.68762	0.000197581	myostatin	FBgn0026199	myoglianin
AAEL011771-RA	1.68695	0.00501421	hypothetical protein	no homolog
AAEL015283-RA	1.6861	0.000847689	synaptic vesicle protein	FBgn0051106	CG31106
AAEL006794-RA	1.68608	0.00056657	dicer-1	FBgn0034246	Dcr-2
AAEL002900-RA	1.68494	0.000378976	conserved hypothetical protein	FBgn0035440	CG14969
AAEL013376-RA	1.68484	0.00231382	conserved hypothetical protein	no homolog
AAEL005270-RA	1.6848	0.00044745	conserved hypothetical protein	FBgn0052633	CG32633
AAEL006577-RA	1.68444	5.16e-05	aspartyl-tRNA synthetase	FBgn0086443	Aats-asn
AAEL010384-RA	1.68395	0.000865122	aldehyde oxidase	FBgn0038349	CG6045
AAEL001402-RA	1.68318	0.000546611	conserved hypothetical protein	no homolog
AAEL008444-RA	1.68188	0.000274244	conserved hypothetical protein	no homolog
AAEL004127-RA	1.6813	0.000281966	acyl-coa dehydrogenase	FBgn0038742	Arc42
AAEL012981-RA	1.68064	0.0019438	sugar transporter	FBgn0051530	CG31530
AAEL000640-RA	1.68053	0.00118066	alanine-glyoxylate aminotransferase	FBgn0037186	CG11241
AAEL014846-RA	1.67723	0.000374074	innexin	FBgn0004646	ogre
AAEL001106-RA	1.67609	0.00161022	conserved hypothetical protein	FBgn0032692	CG15161
AAEL003928-RA	1.67516	0.000494424	pdgf/vegf receptor	FBgn0032006	Pvr
AAEL007739-RA	1.67495	0.0018698	pupal cuticle protein, putative	FBgn0035873	CG13670
AAEL004048-RA	1.67485	0.00930879	UNC93A protein, putative	FBgn0027556	CG4928
AAEL007603-RA	1.67475	0.00196516	odorant-binding protein 56a, putative	FBgn0034471	Obp56e
AAEL010038-RA	1.6738	0.000468787	neuronal calcium sensor, putative	no homolog
AAEL003934-RA	1.67349	0.000288789	conserved hypothetical protein	FBgn0032008	CG14277
AAEL013377-RA	1.67333	0.00432699	conserved hypothetical protein	no homolog
AAEL012509-RA	1.6729	0.000140883		FBgn0000594	Est-P
AAEL008001-RA	1.67262	0.000217497	conserved hypothetical protein	FBgn0036289	CG10657
AAEL014229-RA	1.67225	0.000178231	conserved hypothetical protein	no homolog
AAEL003387-RA	1.67074	0.00675393	cationic amino acid transporter	FBgn0030574	CG9413
AAEL000600-RA	1.67034	0.00665949	Wnt10a protein, putative	FBgn0031903	Wnt10
AAEL011521-RA	1.66944	0.000109411	GPCR Methuselah Family [Source:Aedes_ManualAnnotation;Acc:AAEL800768]	no homolog
AAEL009869-RA	1.66896	0.000594802	low-density lipoprotein receptor (ldl)	FBgn0085381
AAEL009865-RA	1.66664	0.00506618	polypeptide of 976 aa, putative	FBgn0069913	CG4681
AAEL011296-RA	1.66534	0.000377815	conserved hypothetical protein	no homolog
AAEL009647-RA	1.6652	0.00108318	conserved hypothetical protein	FBgn0031312	Tango14
AAEL000667-RB	1.66503	0.000644338	alpha-amylase	FBgn0002570	LvpH
AAEL010769-RA	1.66485	0.000153154	Serine Protease Inhibitor (serpin), likely cleavage at S/A. [Source:Aedes_ManualAnnotation;Acc:AAEL800211]	FBgn0031973	Spn28D
AAEL004450-RA	1.66337	0.000522241	cytochrome b5, putative	FBgn0029854	CG3566
AAEL000667-RA	1.66284	0.000582546	alpha-amylase	FBgn0002570	LvpH
AAEL006854-RA	1.66241	0.00130888	Niemann-Pick Type C-2, putative	FBgn0031381	Npc2a
AAEL000304-RE	1.65971	0.000206705	conserved hypothetical protein	FBgn0032774	CG17549
AAEL005986-RA	1.65893	0.00400897	hypothetical protein	no homolog
AAEL000092-RA	1.65693	0.000827083	glutathione transferase [Source:Aedes_ManualAnnotation;Acc:AAEL800413]	no homolog
AAEL011102-RA	1.65677	3.42e-05	lysosomal-associated transmembrane protein	FBgn0040777	CG14767
AAEL001921-RA	1.65638	0.00166965	hypothetical protein	FBgn0035376	CG2083
AAEL005821-RA	1.65635	0.00249041	alanyl aminopeptidase	FBgn0051198	CG31198
AAEL013934-RA	1.65625	0.0001119		no_info
AAEL000647-RA	1.65565	0.000575701	predicted protein	FBgn0033297	CG8690
AAEL015578-RA	1.65528	0.00306869	alpha-esterase	FBgn0015577	alpha-Est9
AAEL010513-RA	1.65528	0.00425697	class b basic helix-loop-helix protein (bhlhb) (differentially expressed in chondrocytes) (mdec) (sharp)	FBgn0037813
AAEL013004-RA	1.65524	0.0010256	conserved hypothetical protein	FBgn0051344	CG31344
AAEL010466-RA	1.65519	0.000187369	mitogen activated protein kinase kinase kinase 4, mapkkk4, mekk4	FBgn0024329	Mekk1
AAEL001547-RA	1.65513	6.12e-05	hypothetical protein	no homolog
AAEL012595-RA	1.65434	0.000369635	hypothetical protein	no homolog
AAEL010771-RA	1.65427	0.00549429	conserved hypothetical protein	FBgn0033031	CG8245
AAEL000809-RA	1.65425	0.00203774	conserved hypothetical protein	FBgn0038531	CG14325
AAEL010040-RA	1.65413	0.00205682	conserved hypothetical protein	no homolog
AAEL001812-RA	1.65325	0.000282832	organic anion transporter	FBgn0051634	Oatp26F
AAEL015459-RA	1.65253	0.00651923	hypothetical protein	FBgn0026178
AAEL009679-RA	1.65243	0.00547126	secretory Phospholipase A2, putative	FBgn0029720	CG3009
AAEL015308-RA	1.65136	0.000875307	Class A Scavenger Receptor (SRCR domain) with Lysyl Oxidase domain. NB: only one SRCR domain, this gene is likely truncated due to unsequenced start region. [Source:Aedes_ManualAnnotation;Acc:AAEL800187]	FBgn0034660	lox2
AAEL005464-RA	1.65078	0.000437562	conserved hypothetical protein	FBgn0027585	CG8740
AAEL004369-RA	1.65051	0.00303576	alpha-glucosidase	FBgn0039330
AAEL013936-RA	1.6504	0.000622403	Serine Protease Inhibitor (serpin), likely cleavage at I/S. Transcript A. [Source:Aedes_ManualAnnotation;Acc:AAEL800209]	FBgn0031973	Spn28D
AAEL000485-RB	1.64963	9.29e-05	paramyosin, putative	FBgn0019886	CG4589
AAEL003148-RA	1.64898	0.00229785	short-chain dehydrogenase	FBgn0038610	CG7675
AAEL007839-RA	1.6489	0.00378593	beta-hexosaminidase	FBgn0041629	Hexo2
AAEL007444-RA	1.64824	0.000399089	conserved hypothetical protein	FBgn0032202	CG18619
AAEL000575-RA	1.64812	0.00044745	apyrase, putative	FBgn0030264
AAEL001209-RA	1.6479	6.73e-05	sodium-dependent phosphate transporter	FBgn0034392	CG15094
AAEL008787-RA	1.64762	0.00746978	ATP synthase alpha subunit vacuolar	FBgn0020367	Vha68-2
AAEL007921-RA	1.64707	0.000149189	zinc finger protein	no homolog
AAEL004115-RA	1.64621	0.00602065	hypothetical protein	no homolog
AAEL008155-RA	1.64597	0.00379663	protease m1 zinc metalloprotease	no homolog
AAEL005787-RA	1.6457	0.00164328	serine protease, putative	no homolog
AAEL003931-RA	1.64503	0.000192975	conserved hypothetical protein	no homolog
AAEL010224-RA	1.64454	0.000355888	transcription factor GATA-4 (GATA binding factor-4)	FBgn0038391	GATAe
AAEL010684-RA	1.64379	0.00148338	conserved hypothetical protein	FBgn0031907	CG5171
AAEL001281-RA	1.6436	0.00189671	hypothetical protein	no homolog
AAEL000438-RA	1.64303	0.00136198	epoxide hydrolase	no homolog
AAEL014960-RA	1.6429	2.26e-05	conserved hypothetical protein	FBgn0038056	CG5961
AAEL012232-RA	1.64265	0.000107741	hypothetical protein	no homolog
AAEL005702-RA	1.64228	0.00909174	conserved hypothetical protein	FBgn0040687	CG14645
AAEL010014-RA	1.64101	0.00280391	hypothetical protein	no homolog
AAEL011807-RB	1.64077	0.0019144	conserved hypothetical protein	no homolog
AAEL005392-RA	1.63818	0.00305807	dihydropyridine-sensitive l-type calcium channel	FBgn0028859	CG12455
AAEL010576-RR	1.63768	5.14e-05	modifier of mdg4	FBgn0002781	mod(mdg4)
AAEL014618-RA	1.63758	0.00788423	cytochrome P450	no homolog
AAEL009780-RA	1.63708	0.00923038	hypothetical protein	no homolog
AAEL004581-RA	1.63695	0.00135401	conserved hypothetical protein	no homolog
AAEL006984-RA	1.63647	0.00194117	cytochrome P450 [Source:Aedes_ManualAnnotation;Acc:AAEL800321]	FBgn0028940	Cyp28a5
AAEL002777-RA	1.63639	0.000491523	conserved hypothetical protein	FBgn0029937	CG8300
AAEL002726-RA	1.63534	0.00386616	D7 protein, putative	no homolog
AAEL014363-RA	1.63455	0.00160533	hypothetical protein	no homolog
AAEL008574-RA	1.63313	6.19e-05	acyl-CoA oxidase	FBgn0027572	CG5009
AAEL009183-RA	1.63272	7.43e-05	cytochrome oxidase biogenesis protein (oxa1 mitochondrial)	FBgn0035960	CG4942
AAEL007595-RA	1.63047	2.27e-05	conserved hypothetical protein	FBgn0039044	p53
AAEL014713-RA	1.62941	0.00130563	conserved hypothetical protein	FBgn0029813	CG15766
AAEL004507-RA	1.62868	0.00136424	valacyclovir hydrolase	FBgn0037071	CG7632
AAEL006685-RA	1.62843	0.000203354	G-protein, gamma-subunit, putative	FBgn0028433	Ggamma30A
AAEL002904-RA	1.62771	0.00658523	juvenile hormone-inducible protein, putative	FBgn0031800	CG9497
AAEL000760-RA	1.62692	0.00186878	Clip-Domain Serine Protease, family B. [Source:Aedes_ManualAnnotation;Acc:AAEL800825]	no homolog
AAEL008751-RA	1.62574	0.00397549	glucosyl/glucuronosyl transferases	FBgn0036842	CG3797
AAEL006305-RA	1.6252	0.00208066	conserved hypothetical protein	FBgn0001169	H
AAEL010366-RA	1.62373	0.000250436	glucosyl/glucuronosyl transferases	FBgn0040259	Ugt86Da
AAEL010994-RA	1.62305	0.0068706	hypothetical protein	FBgn0061354	CG4844
AAEL011971-RA	1.62268	0.000141121	hypothetical protein	FBgn0039234	nct
AAEL012398-RA	1.62261	0.000133844	hypothetical protein	no homolog
AAEL001815-RA	1.62069	0.000743196	hypothetical protein	no homolog
AAEL009863-RA	1.62039	0.000394628	sodium/dicarboxylate cotransporter, putative	FBgn0036816	Indy
AAEL005703-RA	1.62015	0.000106009	short-chain dehydrogenase	FBgn0031630	CG15629
AAEL002956-RA	1.62007	0.000355888	citrate synthase	FBgn0086133	kdn
AAEL007495-RC	1.61879	0.00328332	phosphoglycerate mutase	FBgn0038957	CG7059
AAEL010172-RA	1.61837	0.00113942	conserved hypothetical protein	no homolog
AAEL004553-RA	1.61633	0.000933554	conserved hypothetical protein	FBgn0030641	CG6299
AAEL002761-RC	1.6158	0.000287291	tropomyosin invertebrate	FBgn0003721	Tm1
AAEL006691-RA	1.61576	0.00118755	fibrinogen and fibronectin	no homolog
AAEL001538-RA	1.61553	0.00149739	conserved hypothetical protein	no homolog
AAEL007018-RA	1.6154	0.00102665	udp-glucose 4-epimerase	no homolog
AAEL009850-RA	1.61506	0.00534976	Galectin. [Source:Aedes_ManualAnnotation;Acc:AAEL800158]	no homolog
AAEL010765-RA	1.61308	0.00242265	conserved hypothetical protein	FBgn0032949	CG3305
AAEL009888-RA	1.61292	0.0008759	bumetanide-sensitive Na-K-Cl cotransport protein, putative	FBgn0051547	CG31547
AAEL000119-RA	1.61212	0.00113942	AMP dependent coa ligase	no homolog
AAEL003014-RA	1.6117	0.00741817	hypothetical protein	no homolog
AAEL002779-RA	1.61105	0.000247559	ribokinase	FBgn0025640	CG13369
AAEL011729-RA	1.61092	0.000326255	conserved hypothetical protein	FBgn0002641	mal
AAEL002625-RA	1.61028	0.00156471	conserved hypothetical protein	FBgn0036947	obst-F
AAEL012671-RA	1.60991	0.00023721	conserved hypothetical protein	FBgn0000370	crc
AAEL008253-RA	1.60803	0.00313794	hypothetical protein	FBgn0085284	CG34255
AAEL009864-RA	1.60697	0.00287772	conserved hypothetical protein	FBgn0020521	pio
AAEL011789-RB	1.60618	0.000340313	citrate synthase	FBgn0086133	kdn
AAEL003872-RA	1.60611	0.000156076	translationally controlled tumor protein	FBgn0037874	Tctp
AAEL010678-RA	1.60599	0.00428979	conserved hypothetical protein	FBgn0036560	CG5895
AAEL002023-RA	1.60328	0.00173663	imaginal disc growth factor	FBgn0026415	Idgf4
AAEL011488-RA	1.60087	0.000208184	short-chain dehydrogenase	FBgn0031630	CG15629
AAEL008635-RA	1.60043	0.00209069	ABC transporter	FBgn0032167	CG5853
AAEL002049-RB	1.59874	0.00140871	circadian protein clock/arnt/bmal/pas	FBgn0023094	cyc
AAEL006108-RA	1.59865	0.000714556	conserved hypothetical protein	no homolog
AAEL003734-RA	1.59846	0.000163093	aconitase, mitochondrial	FBgn0010100	Acon
AAEL006210-RA	1.59822	0.0013225	PFTAIRE-interacting factor 1A, putative	FBgn0027540
AAEL007375-RC	1.59484	0.00311194	pyruvate dehydrogenase	FBgn0017558	Pdk
AAEL006425-RA	1.59456	6.62e-05	trypsin	FBgn0051954	CG31954
AAEL006284-RA	1.59334	0.000367401	hypothetical protein	no homolog
AAEL009992-RA	1.59247	0.00126524	conserved hypothetical protein	no homolog
AAEL002761-RG	1.59241	0.000160807	tropomyosin invertebrate	FBgn0003721	Tm1
AAEL011834-RA	1.59155	0.000463325	hypothetical protein	FBgn0031106	Syx16
AAEL010059-RA	1.59148	0.000147423	bacterial-type ABC transport ATP-binding subunit? or RNAse l inhibitor	FBgn0086706	pix
AAEL014734-RA	1.59134	0.00044938		FBgn0025687	LKR
AAEL002678-RA	1.59107	0.000166419	ras suppressor protein 1, rsu1	FBgn0028546	ics
AAEL011293-RA	1.58998	0.00160704	vitamin-K-epoxide reductase (warfarin-sensitive), putative	FBgn0053544	Vkor
AAEL000150-RA	1.58942	0.00145342	nitrilase, putative	FBgn0037687	CG8132
AAEL007283-RA	1.58937	0.00136056	acetyl-coa synthetase	FBgn0039184	CG6432
AAEL007218-RA	1.58871	0.00398602	conserved hypothetical protein	no homolog
AAEL002759-RD	1.58853	0.00187816	tropomyosin invertebrate	FBgn0004117	Tm2
AAEL012092-RA	1.58768	0.000284653	leucine-rich repeat	FBgn0034718	wdp
AAEL007126-RA	1.58753	0.00350619	sugar transporter	FBgn0053281	CG33281
AAEL010881-RA	1.58683	0.00694991	netrin receptor (unc5)	FBgn0034013	unc-5
AAEL010716-RA	1.58604	0.000174035	preprotein translocase secy subunit (sec61)	FBgn0086357	Sec61alpha
AAEL002877-RA	1.5857	0.00889332	kinesin-like protein KIF17	FBgn0039925	Kif3C
AAEL008651-RA	1.58499	0.000436037	conserved hypothetical protein	FBgn0051248	CG31248
AAEL010082-RA	1.58447	0.00204105	conserved hypothetical protein	FBgn0034978	CG3257
AAEL014768-RA	1.58374	0.000937468	glutamate synthase	FBgn0036663	CG9674
AAEL011894-RA	1.58366	0.00264771	hypothetical protein	no homolog
AAEL012949-RA	1.58348	0.00397075	transferrin	FBgn0034094	Tsf3
AAEL011452-RA	1.58318	0.00180688	conserved hypothetical protein	no homolog
AAEL001113-RA	1.58224	3.9e-05	inorganic phosphate cotransporter, putative	FBgn0024315	Picot
AAEL003285-RA	1.58161	0.00644672	translocation associated membrane protein	FBgn0040340	TRAM
AAEL009120-RA	1.58124	0.000252271	cytochrome P450 [Source:Aedes_ManualAnnotation;Acc:AAEL800354]	FBgn0033979	Cyp6a19
AAEL006347-RA	1.57917	0.00100568	apyrase, putative	FBgn0030264
AAEL014616-RA	1.57907	0.000905716	cytochrome P450 [Source:Aedes_ManualAnnotation;Acc:AAEL800374]	no homolog
AAEL003641-RA	1.57891	0.00399841	sodium/chloride dependent amino acid transporter	no homolog
AAEL004118-RA	1.57883	0.000284323	aldo-keto reductase	FBgn0036290	CG10638
AAEL009423-RA	1.57869	0.00146328	Class B Scavenger Receptor (CD36 domain). [Source:Aedes_ManualAnnotation;Acc:AAEL800202]	FBgn0015924	crq
AAEL002759-RA	1.57836	0.00562898	tropomyosin invertebrate	FBgn0004117	Tm2
AAEL007898-RA	1.57788	0.00347349	calmin	FBgn0053715
AAEL009043-RA	1.57786	0.000161651	conserved hypothetical protein	FBgn0052137	CG32137
AAEL009076-RA	1.57747	0.000291568	conserved hypothetical protein	no homolog
AAEL001594-RA	1.5773	0.00391089	conserved hypothetical protein	FBgn0030005	CG2120
AAEL013267-RA	1.57716	0.00106037	conserved hypothetical protein	FBgn0033502	CG12910
AAEL004887-RA	1.57657	0.00169946	hypothetical protein	no homolog
AAEL009848-RA	1.57645	0.00237038	hypothetical protein	no homolog
AAEL011734-RA	1.57638	0.00137936	Toll-like Receptor. [Source:Aedes_ManualAnnotation;Acc:AAEL800238]	FBgn0036978	Toll-9
AAEL006274-RA	1.57586	0.00410566	glucose transporter (sugar transporter	FBgn0028563	sut1
AAEL008280-RA	1.57493	0.00200235	hypothetical protein	no homolog
AAEL010778-RA	1.57472	0.000208597	conserved hypothetical protein	FBgn0032084	CG13101
AAEL006516-RA	1.5747	0.00449992	vacuolar ATP synthase subunit h	FBgn0027779	VhaSFD
AAEL004229-RA	1.57413	0.00472979	glutathione transferase [Source:Aedes_ManualAnnotation;Acc:AAEL800411]	FBgn0030484	CG1681
AAEL007942-RA	1.57358	0.000671908	fibrinogen and fibronectin	FBgn0050281	CG30281
AAEL001523-RA	1.5715	0.00107945	secretory Phospholipase A2, putative	FBgn0030013	GIIIspla2
AAEL001959-RA	1.5709	9.2e-05	conserved hypothetical protein	FBgn0020303	fok
AAEL010576-RH	1.56987	0.000269697	modifier of mdg4	FBgn0002781	mod(mdg4)
AAEL009330-RA	1.56985	0.000649622	carbonic anhydrase II, putative	FBgn0037788	CG3940
AAEL015251-RA	1.56837	0.000312876	conserved hypothetical protein	FBgn0015591	Ast
AAEL011937-RA	1.56835	0.000902535	glucosyl/glucuronosyl transferases	no homolog
AAEL003459-RA	1.56799	0.0082437	hypothetical protein	no homolog
AAEL003129-RA	1.567	5.45e-05	neuroligin,	FBgn0051146	CG31146
AAEL009630-RA	1.56655	0.00775102	high-affinity cgmp-specific 3,5-cyclic phosphodiesterase	FBgn0052648
AAEL007488-RA	1.56633	0.00603745	hypothetical protein	no homolog
AAEL002469-RB	1.56422	0.0048398	endophilin a,	FBgn0038659	endoA
AAEL009038-RA	1.56259	0.00289714	prolylcarboxypeptidase, putative	FBgn0035726	CG9953
AAEL007470-RA	1.56202	0.000127123	staufen	FBgn0003520	stau
AAEL005374-RA	1.56004	0.00830377	Class B Scavenger Receptor (CD36 domain). [Source:Aedes_ManualAnnotation;Acc:AAEL800191]	FBgn0038867
AAEL001353-RA	1.55935	0.000268323	rhogef and pleckstrin domain protein	FBgn0051536	Cdep
AAEL004723-RA	1.55819	0.000153988	hypothetical protein	no homolog
AAEL005321-RA	1.55787	0.00153396	neurexin iv	FBgn0013997	Nrx-IV
AAEL008063-RA	1.55748	0.000518904	conserved hypothetical protein	FBgn0026577	CG8677
AAEL000774-RA	1.55691	0.00379211	conserved hypothetical protein	no homolog
AAEL009856-RA	1.55676	0.000723575	sodium/dicarboxylate cotransporter, putative	FBgn0036816	Indy
AAEL002049-RA	1.55529	0.00171977	circadian protein clock/arnt/bmal/pas	FBgn0023094	cyc
AAEL006254-RA	1.5548	0.00479898	beta-1,3-glucuronyltransferase s, p	FBgn0036144	GlcAT-P
AAEL009994-RA	1.55448	0.000575701	60S ribosomal protein L4	FBgn0003279	RpL4
AAEL010382-RA	1.55373	0.00201092	aldehyde oxidase	FBgn0038349	CG6045
AAEL005446-RA	1.55311	0.00068748	6-phosphofructo-2-kinase/fructose-2,6-bisphosphatase	no homolog
AAEL012897-RA	1.55195	0.000166189	aconitase, mitochondrial	FBgn0010100	Acon
AAEL000793-RA	1.5519	0.000473284	venom allergen	FBgn0052679	CG32679
AAEL012562-RA	1.55162	0.00399353	circadian locomoter output cycles kaput protein (dclock) (dpas1)	FBgn0023076	Clk
AAEL005143-RB	1.55116	0.000176565	ubiquinone binding protein, putative	FBgn0036728	CG7580
AAEL001047-RA	1.55103	0.00488103	adenylate cyclase	no homolog
AAEL013621-RA	1.55101	0.00367199	conserved hypothetical protein	FBgn0032768	CG17564
AAEL013492-RA	1.55079	0.00482698	Prophenoloxidase [Source:Aedes_ManualAnnotation;Acc:AAEL800573]	FBgn0000165
AAEL010338-RA	1.55045	0.00547652	conserved hypothetical protein	no homolog
AAEL008073-RA	1.5504	0.00219179	conserved hypothetical protein	FBgn0024183	vig
AAEL000315-RA	1.5504	0.000167823	pigeon protein (linotte protein)	FBgn0010309	pigeon
AAEL007681-RA	1.54889	7.42e-05	NADH-ubiquinone oxidoreductase flavoprotein 1 (ndufv1)	FBgn0031771	CG9140
AAEL002807-RA	1.54844	0.0049108	hypothetical protein	no homolog
AAEL003417-RA	1.54835	0.000560619	mitochondrial ATPase inhibitor, putative	FBgn0085452	CG34423
AAEL004486-RA	1.54834	0.000652715	valacyclovir hydrolase	FBgn0037070	CG11309
AAEL004680-RA	1.54727	8e-05	nuclear lamin L1 alpha, putative	FBgn0038977	CG5376
AAEL001485-RA	1.54617	0.00052335	conserved hypothetical protein	FBgn0035734	CG14823
AAEL009876-RA	1.54601	0.00821159	hypothetical protein	FBgn0003193
AAEL004071-RA	1.54556	0.000476066	nitrogen fixation protein nifu	FBgn0037637	CG9836
AAEL003107-RA	1.54536	0.00289542	conserved hypothetical protein	no homolog
AAEL013371-RA	1.5452	0.00887039	hypothetical protein	no homolog
AAEL002862-RA	1.5449	0.000469974	tensin	FBgn0000244	by
AAEL002160-RA	1.54439	0.000125627	GTP-binding protein	FBgn0030151	CG1354
AAEL004687-RA	1.54346	0.00133464	otopetrin	FBgn0031514	CG3332
AAEL010083-RA	1.54253	0.00764974	IMD pathway signalling, Immune Deficiency (Imd). [Source:Aedes_ManualAnnotation;Acc:AAEL800476]	FBgn0013983	imd
AAEL000146-RA	1.54163	0.00348972	nitrilase, putative	FBgn0037687	CG8132
AAEL005600-RA	1.54141	0.000335674	conserved hypothetical protein	FBgn0038432	CG14883
AAEL008054-RA	1.54132	0.00937555	conserved hypothetical protein	FBgn0041094	scyl
AAEL012856-RA	1.54097	0.00496729	hypothetical protein	no homolog
AAEL012658-RA	1.54086	0.00136632	rgs-gaip interacting protein gipc	FBgn0010504	kermit
AAEL014607-RA	1.53993	0.00103045	cytochrome P450	no homolog
AAEL005772-RA	1.53983	0.000355888	odorant-binding protein 99c, putative	FBgn0039678	Obp99a
AAEL000321-RA	1.53969	0.00149449	acetyl-coa synthetase	FBgn0012034	AcCoAS
AAEL008016-RA	1.5386	0.00294927	short-chain dehydrogenase	FBgn0029994	CG2254
AAEL012631-RA	1.53796	0.000457452	myosin i	FBgn0086347	Myo31DF
AAEL015053-RB	1.53741	0.00295818	conserved hypothetical protein	no homolog
AAEL012153-RA	1.53652	0.000836439	conserved hypothetical protein	FBgn0034439	CG10062
AAEL012245-RA	1.53629	0.000481358	conserved hypothetical protein	FBgn0031097	obst-A
AAEL002595-RA	1.53527	0.00194359	serine protease	FBgn0032213	CG5390
AAEL009909-RA	1.53478	0.000298741	cln3/battenin	FBgn0036756	cln3
AAEL000893-RA	1.53457	0.000485002	sex-determining region y protein, sry	FBgn0000411	D
AAEL005603-RA	1.53453	0.000821908	trypsin	no homolog
AAEL008318-RA	1.53425	0.00164194	cadherin, putative	FBgn0038247	Cad88C
AAEL008388-RA	1.53393	0.000659871	ATP-binding cassette sub-family A member 3, putative	FBgn0031170	CG1718
AAEL010799-RA	1.53347	0.000422743	conserved hypothetical protein	no homolog
AAEL010337-RB	1.5324	0.00225671	CRAL/TRIO domain-containing protein	FBgn0032785	CG10026
AAEL000470-RA	1.53211	0.00181281	hypothetical protein	no homolog
AAEL002420-RB	1.53207	0.00581248	conserved hypothetical protein	FBgn0025574	Pli
AAEL004156-RA	1.53161	0.00309619	fibrinogen and fibronectin	FBgn0050281	CG30281
AAEL013114-RA	1.53147	0.000166189	DNA-J, putative	FBgn0030658	CG7872
AAEL004440-RA	1.52968	0.000598235	tubulin-specific chaperone e	FBgn0033495	CG12214
AAEL005001-RA	1.52959	0.00334918	aquaporin	FBgn0034882	CG5398
AAEL006390-RA	1.52926	0.000529054	vacuolar proton ATPases	FBgn0028670	Vha100-2
AAEL010715-RA	1.52905	0.0012598	hypothetical protein	no homolog
AAEL014762-RA	1.52875	0.00689799	zinc transporter	FBgn0039714	CG7816
AAEL005004-RA	1.52861	0.00215533	hypothetical protein	no homolog
AAEL002454-RA	1.52801	0.00186878	conserved hypothetical protein	no homolog
AAEL007945-RA	1.52758	0.00111755	eukaryotic translation initiation factor 3 subunit	FBgn0022023	eIF-3p40
AAEL010799-RB	1.52707	0.00201092	conserved hypothetical protein	no homolog
AAEL004332-RA	1.52612	0.00241673	conserved hypothetical protein	FBgn0034452	Oseg6
AAEL008263-RA	1.52599	0.0044738	conserved hypothetical protein	FBgn0034763	RYBP
AAEL003384-RA	1.52455	0.000996655	conserved hypothetical protein	FBgn0036426	CG9592
AAEL006883-RA	1.52411	0.0001812	conserved hypothetical protein	FBgn0033153	Gadd45
AAEL012518-RA	1.52404	0.00058773	conserved hypothetical protein	no homolog
AAEL004826-RA	1.52364	0.000232074	conserved hypothetical protein	FBgn0035358	CG14949
AAEL007752-RA	1.52361	0.000472558	cytochrome c oxidase, subunit VIIA, putative	FBgn0040529	CG9603
AAEL006207-RA	1.52338	0.00362259	conserved hypothetical protein	FBgn0037935	CG6834
AAEL006029-RA	1.52328	0.000147597	dynactin subunit	FBgn0021825	Dmn
AAEL006169-RA	1.52289	0.00125581	cathepsin d	FBgn0029093	cathD
AAEL004312-RA	1.52277	0.00052781	hypothetical protein	no homolog
AAEL005559-RA	1.5227	5.04e-05	myosin light chain kinase	FBgn0033441
AAEL014839-RA	1.52253	0.00547652	sidestep protein	FBgn0016061	side
AAEL007889-RA	1.52249	0.000694326	F-spondin	FBgn0033710	CG17739
AAEL005155-RA	1.52143	0.00666803	conserved hypothetical protein	FBgn0035317	osm-1
AAEL008351-RA	1.52124	0.000190751	POSSIBLE INTEGRAL MEMBRANE EFFLUX PROTEIN EFPA, putative	FBgn0086676	spin
AAEL001421-RA	1.51999	0.00130275	high density lipoprotien binding protein / vigilin	FBgn0027835	Dp1
AAEL014425-RA	1.51892	0.0035761	conserved hypothetical protein	FBgn0037800	CG3996
AAEL014437-RA	1.5186	0.000798079	conserved hypothetical protein	FBgn0037935	CG6834
AAEL006773-RA	1.51852	0.00119417	hypothetical protein	no homolog
AAEL011193-RA	1.51852	0.0052353	steroid dehydrogenase	FBgn0032614	CG13284
AAEL013649-RA	1.51847	0.00935794	elongase, putative	FBgn0050008	CG30008
AAEL015010-RA	1.51829	0.0012155	acetyl-coa synthetase	FBgn0012034	AcCoAS
AAEL013484-RA	1.51824	0.00605824	hypothetical protein	no homolog
AAEL008181-RA	1.51818	0.00043165	alpha6-fucosyltransferase, putative	FBgn0030327	FucT6
AAEL014201-RA	1.51737	0.000164274	chaperone protein, putative	FBgn0039689	CG7598
AAEL001338-RA	1.5173	0.000350038	helix-loop-helix transcription factor	no homolog
AAEL011007-RA	1.51527	0.00301066	fibrinogen and fibronectin	FBgn0050281	CG30281
AAEL006480-RA	1.51501	8.01e-05	conserved hypothetical protein	no homolog
AAEL010132-RA	1.51428	0.00076157	Pray For Elves, putative	FBgn0039332	CG11910
AAEL014171-RA	1.51415	0.000395912	conserved hypothetical protein	FBgn0035358	CG14949
AAEL002417-RC	1.51243	0.00535535	troponin t, invertebrate	FBgn0004169	up
AAEL006912-RA	1.51229	0.000826626	acetyl-coa acetyltransferase 2,	FBgn0035203	CG9149
AAEL006721-RA	1.51219	0.000547083	2-oxoglutarate dehydrogenase	FBgn0010352	Nc73EF
AAEL012054-RA	1.51093	0.00181735	quiescin-sulphydryl oxidase4, putative	FBgn0033814	CG4670
AAEL005731-RA	1.51052	0.00994611	forkhead box protein (AaegFOXL)	no homolog
AAEL008278-RA	1.51047	0.000130105	conserved hypothetical protein	FBgn0050339	CG30339
AAEL000975-RA	1.50919	0.00750562	hypothetical protein	no homolog
AAEL003965-RA	1.50908	0.000399711	calpain 4, 6, 7, invertebrate	FBgn0012051	CalpA
AAEL004213-RA	1.5087	0.00973683	monocarboxylate transporter	FBgn0031010	CG8028
AAEL012784-RA	1.50817	0.00218635	conserved hypothetical protein	FBgn0039489	CG5880
AAEL010163-RA	1.50807	0.000351565	conserved hypothetical protein	FBgn0051300	CG31300
AAEL006573-RA	1.50774	0.000711514	conserved hypothetical protein	FBgn0033919	CG8547
AAEL006510-RA	1.50762	0.000881821	conserved hypothetical protein	FBgn0031637	CG2950
AAEL010139-RA	1.50684	0.00433065	serine protease, putative	FBgn0028915
AAEL005738-RA	1.50675	0.00192451	yellow protein precursor	FBgn0032601	yellow-b
AAEL002417-RA	1.50634	0.00304081	troponin t, invertebrate	FBgn0004169	up
AAEL000520-RA	1.50601	0.00627255	conserved hypothetical protein	FBgn0031320	CG5126
AAEL003238-RA	1.50441	0.000336696	conserved hypothetical protein	FBgn0039489	CG5880
AAEL000718-RA	1.50397	0.000284639	virus-induced RNA, putative	FBgn0043841	vir-1
AAEL006302-RA	1.50333	0.000670479	spire	no homolog
AAEL003150-RA	1.50331	0.000816493	alpha-n-acetylglucosaminidase	FBgn0014417	CG13397
AAEL011587-RB	1.50293	0.00135401	ribosomal protein L27, putative	FBgn0039359	RpL27
AAEL007878-RA	1.50293	0.00444679	ornithine decarboxylase	FBgn0013307	Odc1
AAEL007494-RA	1.50213	0.000993293	calcineurin b subunit	FBgn0037358	elm
AAEL000275-RA	1.50191	0.00852543	hypothetical protein	no homolog
AAEL004023-RA	1.50177	0.00081318	juvenile hormone-inducible protein, putative	FBgn0030060	CG2004
AAEL011098-RA	1.50123	0.00365822	conserved hypothetical protein	FBgn0028997	nmdyn-D7
AAEL006762-RA	1.50099	0.000128503	conserved hypothetical protein	FBgn0034519	CG18065
AAEL015100-RA	1.50004	0.000133051	calnexin	FBgn0015622	Cnx99A
AAEL004821-RA	0.666662	0.000906572	potassium-dependent sodium-calcium exchanger, putative	FBgn0039941	CG17167
AAEL003172-RA	0.666634	0.00125727	transcription factor IIIA, putative	no homolog
AAEL008413-RA	0.666628	0.00163338	serine/threonine protein kinase	FBgn0004876	cdi
AAEL012421-RA	0.666299	0.00191061	cadherin	FBgn0003391	shg
AAEL003367-RA	0.665899	0.000593489	nucleolar complex protein	FBgn0029672	CG2875
AAEL014048-RA	0.665467	0.000627893	hypothetical protein	FBgn0002945	nkd
AAEL013310-RA	0.66544	0.000372881	conserved hypothetical protein	FBgn0037345	rev7
AAEL002847-RA	0.665369	0.000166189	conserved hypothetical protein	FBgn0034037	CG8214
AAEL009268-RA	0.665046	0.00464681	pla2g4b	FBgn0036366	CG10133
AAEL004269-RA	0.664927	0.00135741	hippocalcin	FBgn0013303	Nca
AAEL006870-RA	0.664915	0.000971067	sorting nexin	FBgn0032191	CG5734
AAEL002099-RA	0.664893	0.00883306	cuticle protein, putative	FBgn0035510	Cpr64Aa
AAEL013827-RA	0.664713	0.00374325	hypothetical protein	no homolog
AAEL000737-RB	0.66469	0.00371623	rab6 GTPase activating protein, gapcena (rabgap1 protein)	FBgn0035879	CG7112
AAEL003510-RA	0.664507	0.00030561	ribonuclease hi large subunit	FBgn0031252	CG13690
AAEL010829-RA	0.6645	0.000320291	protein arginine n-methyltransferase	FBgn0038306	Art3
AAEL010497-RA	0.664231	0.00020775	zinc finger protein	no homolog
AAEL013051-RA	0.664197	0.00101027	conserved hypothetical protein	no homolog
AAEL008038-RB	0.664186	0.000121079	conserved hypothetical protein	FBgn0030039	CG12123
AAEL001207-RA	0.6638	0.00384829		no homolog
AAEL005042-RA	0.663773	0.000711514	hypothetical protein	no homolog
AAEL006074-RA	0.663772	0.000326255	endoplasmic reticulum mannosyl-oligosaccharide 1,2-alpha-mannosidase	FBgn0039634	CG11874
AAEL000558-RA	0.663646	0.00171977	neural stem cell-derived dendrite regulator	no homolog
AAEL005592-RA	0.663392	0.000387255	conserved hypothetical protein	FBgn0033491	CG18011
AAEL008613-RA	0.663371	0.000238411	TraB, putative	FBgn0038111	CG12360
AAEL013044-RA	0.663222	0.000193208	hypothetical protein	no homolog
AAEL009264-RA	0.662917	0.00484951	hypothetical protein	FBgn0023407	B4
AAEL004172-RA	0.662722	0.000297041	tubulin alpha chain	FBgn0004236
AAEL007304-RA	0.662688	0.00162886	hypothetical protein	FBgn0052296	Mrtf
AAEL003277-RA	0.662626	0.00344697	hypothetical protein	FBgn0024321	NK7.1
AAEL005510-RA	0.662443	0.000183319	WD-repeat protein	FBgn0039451	CG6420
AAEL005368-RA	0.662438	0.000458681		FBgn0004915	TfIIB
AAEL012442-RB	0.662407	9.07e-05	conserved hypothetical protein	FBgn0032517	CG7099
AAEL000511-RA	0.662245	0.00128524		no homolog
AAEL010136-RA	0.662192	0.000116694	hypothetical protein	FBgn0028530	mTTF
AAEL003244-RA	0.662103	0.00344733	conserved hypothetical protein	FBgn0031344	CG7420
AAEL003794-RA	0.661758	0.000664862	homeobox protein nk-2	FBgn0028993	scro
AAEL009198-RA	0.661594	0.000401384	conserved hypothetical protein	no homolog
AAEL008480-RA	0.661557	0.000242532	hypothetical protein	no homolog
AAEL012817-RA	0.661387	0.000363883	transcription factor E2f, putative (dE2F)	FBgn0011766	E2f
AAEL012303-RA	0.661355	0.00490575	conserved hypothetical protein	FBgn0031196	CG17599
AAEL008663-RA	0.661294	0.00107709	aldo-keto reductase	FBgn0037973	CG18547
AAEL013844-RA	0.661108	0.000454043	diazepam binding inhibitor, putative	FBgn0031992	CG8498
AAEL010197-RA	0.661033	0.00731681	axonemal dynein intermediate chain	FBgn0036195	CG6053
AAEL005827-RA	0.661013	7.43e-05	katanin P80 subunit	FBgn0040207	kat80
AAEL009051-RA	0.661008	0.000473284	Thioredoxin Peroxidase. [Source:Aedes_ManualAnnotation;Acc:AAEL800499]	FBgn0031479	Prx6005
AAEL000832-RA	0.660965	0.000165674	cleavage and polyadenylation specificity factor cpsf	FBgn0024698	Cpsf160
AAEL005781-RA	0.660964	0.00762528	hypothetical protein	FBgn0039686	CG15506
AAEL007510-RA	0.660774	0.00121119	conserved hypothetical protein	FBgn0038366	CG4576
AAEL006135-RA	0.660691	0.000967909	20 Kd nuclear cap binding protein	FBgn0022943	Cbp20
AAEL003677-RA	0.660535	0.000479985	hypothetical protein	no homolog
AAEL008604-RA	0.660466	0.00242118	zinc carboxypeptidase	FBgn0032144	CG17633
AAEL008403-RA	0.660242	0.000912901	conserved hypothetical protein	no homolog
AAEL000755-RA	0.660205	0.000264095	conserved hypothetical protein	FBgn0034033	CG8204
AAEL009400-RC	0.660037	0.00202553	ccr4-associated factor	FBgn0036239	Pop2
AAEL009563-RA	0.660016	0.00446829	hypothetical protein	no homolog
AAEL007075-RA	0.659984	0.000494424	conserved hypothetical protein	FBgn0030328	Amun
AAEL000070-RA	0.659851	0.000460127	conserved hypothetical protein	FBgn0051342	CG31342
AAEL006819-RA	0.659573	0.00186856	conserved hypothetical protein	FBgn0037815	Rrp46
AAEL004244-RA	0.659499	0.000535069	hypothetical protein	no homolog
AAEL002740-RA	0.659336	0.000647464	homeobox protein otx	FBgn0004102	oc
AAEL009238-RA	0.659299	0.000423466	conserved hypothetical protein	FBgn0027500	spd-2
AAEL003059-RA	0.659128	0.0015717	conserved hypothetical protein	FBgn0035916	CG5978
AAEL011389-RA	0.659106	0.000110674	conserved hypothetical protein	FBgn0038058	CG5608
AAEL009375-RA	0.659009	0.000607163	plekhh1	FBgn0025623
AAEL008548-RA	0.658921	0.000269697	conserved hypothetical protein	no homolog
AAEL014366-RB	0.658485	0.002608	conserved hypothetical protein	no homolog
AAEL000540-RA	0.658452	0.0007985	fasciclin, putative	FBgn0000636	Fas3
AAEL013462-RA	0.658328	0.000234201	conserved hypothetical protein	no homolog
AAEL013617-RA	0.658321	0.00115703	chimerin (rho- GTPase-activating protein)	FBgn0029778	RhoGAP5A
AAEL010327-RA	0.658279	0.000396554	six/sine homebox transcription factors	FBgn0027364	Six4
AAEL009184-RA	0.65821	0.00755108	hypothetical protein	no homolog
AAEL004608-RA	0.658133	0.00167673	hypothetical protein	no homolog
AAEL003947-RA	0.658042	0.000950052	hypothetical protein	FBgn0028991	seq
AAEL014441-RA	0.65778	0.00050873	conserved hypothetical protein	FBgn0051104	CG31104
AAEL010816-RA	0.65776	0.000430072	prolyl-tRNA synthetase	FBgn0027082	Aats-pro
AAEL002785-RA	0.657757	0.00030561	DNA polymerase epsilon subunit b	FBgn0035644	Pole2
AAEL010804-RA	0.657613	0.000118231	calcium/calmodulin-dependent protein kinase kinase	FBgn0040056	CG17698
AAEL013558-RA	0.657382	0.0033769	conserved hypothetical protein	FBgn0043796	CG12219
AAEL001627-RA	0.657189	0.00023931	udp-n-acteylglucosamine pyrophosphorylase	FBgn0086705
AAEL001001-RA	0.657183	0.000743709	hypothetical protein	no homolog
AAEL000888-RB	0.657015	0.00116317	single stranded DNA binding protein	FBgn0011481	Ssdp
AAEL004089-RA	0.656971	0.00131245	conserved hypothetical protein	no homolog
AAEL012742-RA	0.656768	0.000394628	conserved hypothetical protein	FBgn0031190	CG12576
AAEL001939-RA	0.656533	0.000401993	hypothetical protein	FBgn0037205	CG11133
AAEL004881-RA	0.65653	0.00115447	adam	FBgn0039688	Kul
AAEL015143-RB	0.656512	0.0022747	glycine rich RNA binding protein, putative	FBgn0005648	Pabp2
AAEL012258-RA	0.656357	0.000217497	platelet-activating factor acetylhydrolase ib	FBgn0025809	Paf-AHalpha
AAEL007287-RA	0.656231	0.00605222	conserved hypothetical protein	FBgn0025835	CG17707
AAEL006071-RA	0.656024	0.00484849	hypothetical protein	no homolog
AAEL008810-RA	0.655895	0.000861807	hypothetical protein	no homolog
AAEL007367-RA	0.655692	0.000665782	conserved hypothetical protein	FBgn0038437	CG14898
AAEL012708-RA	0.655631	0.000142093	conserved hypothetical protein	FBgn0039920	CG11360
AAEL010053-RA	0.655579	0.000791092	conserved hypothetical protein	FBgn0038966	pinta
AAEL002104-RA	0.655558	3.67e-05	hypothetical protein	no homolog
AAEL007041-RA	0.655536	0.000341906	low-density lipoprotein receptor (ldl)	FBgn0053087	CG33087
AAEL007280-RA	0.655348	0.000177551	conserved hypothetical protein	FBgn0025626	CG4281
AAEL011189-RA	0.655335	0.00245242	conserved hypothetical protein	FBgn0031708	CG7382
AAEL004351-RB	0.655301	0.000584239	casein kinase	FBgn0011253
AAEL013939-RA	0.655225	0.000121679	erk1/2	FBgn0003256	rl
AAEL004552-RA	0.655073	0.00215993	conserved hypothetical protein	FBgn0029800	lin-52
AAEL005035-RA	0.655044	0.00122371	1,4-dihydroxy-2-naphthoate octaprenyltransferase	FBgn0028375	heix
AAEL004250-RA	0.654612	0.000451086	conserved hypothetical protein	no homolog
AAEL000136-RA	0.654521	6.12e-05	conserved hypothetical protein	no homolog
AAEL010663-RA	0.654324	0.000534794	cleavage and polyadenylation specificity factor	FBgn0036570	CG5222
AAEL002070-RA	0.654178	0.000410457	conserved hypothetical protein	FBgn0031869	CG18304
AAEL001775-RA	0.654176	0.00133946	conserved hypothetical protein	FBgn0031979	CG7429
AAEL005652-RA	0.65381	0.00960298	hypothetical protein	no homolog
AAEL008905-RA	0.653337	0.000140865	host cell factor C1	FBgn0039904	Hcf
AAEL001254-RA	0.653203	0.000702882	conserved hypothetical protein	FBgn0036389	ssp2
AAEL009813-RA	0.653072	0.00416204	glutamate receptor 7 (ampa)	FBgn0031634	Ir25a
AAEL010784-RA	0.652948	0.000273265	conserved hypothetical protein	FBgn0037756	CG8507
AAEL003451-RA	0.652915	0.00184647	conserved hypothetical protein	FBgn0039128	CG13599
AAEL012810-RA	0.652912	0.00156251	conserved hypothetical protein	no homolog
AAEL014287-RA	0.652617	0.00030561		FBgn0036959	CG6951
AAEL009462-RA	0.652617	0.00292184	hydroxyacylglutathione hydrolase	FBgn0037024	CG4365
AAEL008422-RA	0.652591	0.00044321	conserved hypothetical protein	no homolog
AAEL012418-RA	0.652256	0.000870528	deoxyribonuclease ii	FBgn0000477	DNaseII
AAEL004405-RA	0.652213	0.00149329	conserved hypothetical protein	FBgn0035166	CG13902
AAEL015124-RA	0.651966	0.00526357	hypothetical protein	no homolog
AAEL012044-RA	0.651959	0.00376169	sugar transporter	no homolog
AAEL000739-RA	0.651907	0.000553669	hypothetical protein	no homolog
AAEL003060-RA	0.651906	0.00533338	serine-type enodpeptidase,	FBgn0038595	CG7142
AAEL009031-RA	0.651862	0.00716731	forkhead box protein (AaegFOXF)	FBgn0045759	bin
AAEL012071-RA	0.651673	0.000182156	ras	FBgn0003205	Ras85D
AAEL011321-RA	0.651481	6.64e-05	conserved hypothetical protein	FBgn0032105	borr
AAEL012959-RA	0.651474	0.000395912	conserved hypothetical protein	no homolog
AAEL006499-RA	0.65138	6.15e-05	hypothetical protein	FBgn0052685	CG32685
AAEL011280-RA	0.650927	0.0011287	voltage-dependent p/q type calcium channel	FBgn0001991	Ca-alpha1D
AAEL005070-RB	0.650925	0.00011885	conserved hypothetical protein	FBgn0039116	CG10375
AAEL015013-RA	0.650771	0.000608444	conserved hypothetical protein	FBgn0035838	ldbr
AAEL005654-RA	0.650639	0.005828	tryptase, putative	no homolog
AAEL008843-RA	0.650635	9.29e-05	conserved hypothetical protein	FBgn0036826	CG3893
AAEL001395-RA	0.650247	0.000119036	suppression of tumorigenicity	FBgn0037026	CG3634
AAEL008484-RA	0.650062	0.000392912	steroid receptor-interacting snf2 domain protein	FBgn0034976	CG4049
AAEL008835-RA	0.650001	0.000635567	hypothetical protein	no homolog
AAEL003022-RB	0.649902	0.00126417	serine/threonine-protein kinase	FBgn0004462	Pk17E
AAEL010613-RA	0.649879	0.000197127	conserved hypothetical protein	FBgn0033169	CG11123
AAEL006666-RA	0.649844	0.000201401	cmp-sialic acid transporter	FBgn0031676	CG14040
AAEL010138-RA	0.649839	0.00256045	conserved hypothetical protein	FBgn0034924	CG17658
AAEL007176-RA	0.649713	0.000293425	rabkinesin-6	FBgn0003545	sub
AAEL006121-RA	0.649524	0.000385227	trypsin, putative	FBgn0038211	CG9649
AAEL013842-RA	0.649449	0.000178493	conserved hypothetical protein	FBgn0031991
AAEL000033-RA	0.649401	0.000273265	conserved hypothetical protein	FBgn0035462	CG1120
AAEL001067-RA	0.649311	0.00352442	hypothetical protein	no homolog
AAEL005033-RA	0.649074	0.00023721	conserved hypothetical protein	no homolog
AAEL011256-RA	0.648782	0.000284097	cation efflux protein/ zinc transporter	FBgn0025693	CG11163
AAEL004170-RA	0.648658	0.000885067	hypothetical protein	no homolog
AAEL012249-RA	0.648543	0.00205007	conserved hypothetical protein	FBgn0038725	CG6184
AAEL013858-RA	0.64818	0.000662241	raf	FBgn0003079	phl
AAEL008422-RB	0.648102	0.000129432	conserved hypothetical protein	no homolog
AAEL004713-RA	0.647956	0.00181281	hypothetical protein	no homolog
AAEL005404-RA	0.64752	0.00305817	conserved hypothetical protein	FBgn0039221
AAEL002429-RA	0.647481	0.00125581	hypothetical protein	no homolog
AAEL003917-RA	0.64716	0.00023124	mitochondrial inner membrane protease subunit	FBgn0030669	CG9240
AAEL014706-RA	0.647	0.000852912	LL5 beta protein, putative	FBgn0029688	lva
AAEL003937-RA	0.646727	0.00010366		FBgn0003502	Btk29A
AAEL011630-RA	0.646713	0.00073196	conserved hypothetical protein	FBgn0050010	CG30010
AAEL003950-RA	0.64666	9.2e-05	helicase	no homolog
AAEL000561-RA	0.646456	0.000146727	hypothetical protein	FBgn0052202	CG32202
AAEL005585-RA	0.646451	0.00016489	hypothetical protein	FBgn0033491	CG18011
AAEL007208-RA	0.646422	0.00704748	conserved hypothetical protein	FBgn0011746	ana
AAEL007463-RA	0.646397	0.00168083	5,10-methylenetetrahydrofolate reductase, putative	FBgn0036157	CG7560
AAEL005215-RA	0.645781	0.000192742	conserved hypothetical protein	FBgn0035388	CG2162
AAEL002921-RA	0.645684	0.00044745	conserved hypothetical protein	FBgn0031549	Spindly
AAEL012470-RA	0.6456	0.000437562	conserved hypothetical protein	FBgn0043796	CG12219
AAEL001223-RA	0.645413	0.00493762	engulfment and cell motility protein	FBgn0032409	Ced-12
AAEL004883-RA	0.64522	0.00348895	guanylate cyclase	no homolog
AAEL011083-RA	0.645166	0.000334233		no homolog
AAEL006902-RA	0.644792	0.00335261	serine-type enodpeptidase,	FBgn0030688	CG8952
AAEL014424-RA	0.64472	0.0036877	hypothetical protein	no homolog
AAEL002376-RA	0.644715	0.00239215		FBgn0000326	clt
AAEL000129-RA	0.644683	0.00375914	hypothetical protein	FBgn0053518
AAEL007037-RA	0.644487	0.00136658		no_info
AAEL003254-RA	0.644359	0.00493807	ATPase n2b	FBgn0033734	CG8520
AAEL008178-RA	0.644263	0.00163138	DNA replication licensing factor MCM1	no homolog
AAEL012166-RA	0.644198	0.00139617	conserved hypothetical protein	FBgn0041582	tamo
AAEL013963-RA	0.644049	0.000592174	tumor necrosis factor induced protein	FBgn0034894	CG4091
AAEL005905-RA	0.644037	0.000714556	conserved hypothetical protein	FBgn0030660	CG8097
AAEL000026-RA	0.643892	6.56e-05	dynein light chain, putative	FBgn0037773	CG5359
AAEL001472-RA	0.643726	0.000239982	phosphatidyltransferase	FBgn0053116	CG33116
AAEL014501-RA	0.643692	0.000471604	mediator complex, subunit, putative	FBgn0036581	MED10
AAEL007039-RA	0.643657	0.00280391	Peptidoglycan Recognition Protein (Short) [Source:Aedes_ManualAnnotation;Acc:AAEL800185]	FBgn0043575	PGRP-SC2
AAEL009755-RA	0.643645	0.00153405	conserved hypothetical protein	FBgn0033486	CG11866
AAEL010759-RA	0.643501	0.000879454	DNA repair protein rad9	FBgn0025807	Rad9
AAEL002584-RA	0.643304	0.00767449	hypothetical protein	no homolog
AAEL014249-RA	0.642685	0.000694326	WD-repeat protein	FBgn0039880
AAEL014358-RA	0.642404	0.000174127	conserved hypothetical protein	FBgn0053249
AAEL002952-RA	0.642341	0.00775488	hypothetical protein	FBgn0037427	Osi17
AAEL013681-RA	0.6422	0.000916898	hypothetical protein	no homolog
AAEL012451-RA	0.642091	7.44e-05	conserved hypothetical protein	FBgn0025394	CG32810
AAEL005757-RA	0.641901	0.00720265	hypothetical protein	no homolog
AAEL013721-RA	0.64183	0.000331318	RNA binding protein, putative	FBgn0032515	loqs
AAEL008022-RA	0.641613	0.00106484	homeobox protein	FBgn0020912	Ptx1
AAEL014049-RA	0.641108	0.000376436	predicted protein	no homolog
AAEL001687-RA	0.64102	0.00306869	adenylate cyclase	no homolog
AAEL014014-RB	0.640855	0.000999566	ornithine cyclodeaminase	FBgn0030799	CG4872
AAEL014455-RA	0.640765	0.00103392	hypothetical protein	no homolog
AAEL013473-RA	0.640684	0.000222228	cAMP-specific 3,5-cyclic phosphodiesterase	no homolog
AAEL007388-RA	0.640089	0.00334918	hypothetical protein	FBgn0038246	CG14853
AAEL008377-RA	0.640025	0.00120594	hypothetical protein	FBgn0003268	rod
AAEL011969-RA	0.639951	0.000997095	protein-s isoprenylcysteine o-methyltransferase	FBgn0036336	ste14
AAEL000170-RA	0.63995	0.000385227	hypothetical protein	FBgn0034643	CG10321
AAEL012752-RA	0.639937	6.51e-05	tyrosine-protein kinase btk29a	FBgn0003502	Btk29A
AAEL002682-RA	0.639856	0.000638026	venom allergen	FBgn0034623	CG9822
AAEL015060-RA	0.639635	0.000341906	Rad51A protein, putative	FBgn0033389	Rad51C
AAEL011233-RA	0.639473	0.000332985	SM protein G, putative	FBgn0031962	CG18591
AAEL007772-RA	0.639302	0.00429843	conserved hypothetical protein	no homolog
AAEL010732-RA	0.639071	0.00115219	ATP-dependent RNA helicase	FBgn0086444	l(2)37Cb
AAEL011330-RA	0.638967	0.000860259	conserved hypothetical protein	FBgn0032105	borr
AAEL013258-RA	0.638902	0.000280606	conserved hypothetical protein	FBgn0036476	CG6945
AAEL012339-RA	0.638831	4.41e-05	cdk1	FBgn0004107	cdc2c
AAEL000788-RA	0.638792	0.00249108	matrix metalloproteinase	FBgn0033438	Mmp2
AAEL009212-RA	0.638705	0.000120327	lola	FBgn0005630	lola
AAEL006989-RA	0.638629	0.00516655	cytochrome P450 [Source:Aedes_ManualAnnotation;Acc:AAEL800323]	FBgn0031689	Cyp28d1
AAEL006306-RA	0.638552	0.000635567	conserved hypothetical protein	no homolog
AAEL008161-RA	0.638312	0.00024662	abnormal oocyte, putative	FBgn0000018	abo
AAEL003004-RA	0.637996	9.56e-05	hypothetical protein	no homolog
AAEL000971-RA	0.637939	0.000262146	smile protein	FBgn0020312	CG4050
AAEL011862-RA	0.637758	5.16e-05	conserved hypothetical protein	FBgn0035986	CG4022
AAEL002195-RA	0.637674	0.00014324	conserved hypothetical protein	FBgn0031070	CG12702
AAEL014852-RA	0.637321	0.00164804	hypothetical protein	no homolog
AAEL004170-RB	0.637095	0.00186283	hypothetical protein	no homolog
AAEL001369-RA	0.636944	0.00100611	conserved hypothetical protein	no homolog
AAEL012209-RA	0.636934	5.74e-05	ring finger protein	FBgn0003330	Sce
AAEL001876-RA	0.636786	0.000643376	decapentaplegic, deca	FBgn0000490	dpp
AAEL010733-RA	0.636508	0.0010562	hypothetical protein	no homolog
AAEL011510-RA	0.636359	0.00429313	multiple inositol polyphosphate phosphatase	FBgn0026061	Mipp1
AAEL011281-RA	0.636352	0.000150913	cytochrome B561	FBgn0033764
AAEL006858-RA	0.636088	0.000172572	hypothetical protein	no homolog
AAEL009058-RA	0.635875	0.00174707	hypothetical protein	no homolog
AAEL005137-RA	0.635693	0.000329437	tetraspanin, putative	FBgn0036769	Tsp74F
AAEL013035-RA	0.635683	0.0052298	hypothetical protein	no homolog
AAEL009097-RA	0.635407	0.00214932	conserved hypothetical protein	FBgn0032228	CG5367
AAEL006554-RA	0.635056	0.000814839	conserved hypothetical protein	FBgn0052066	CG32066
AAEL011278-RC	0.634881	0.00362065	apolipoprotein D, putative	FBgn0033799	GLaz
AAEL005838-RA	0.634707	0.000107363	hypothetical protein	no homolog
AAEL008870-RA	0.634417	0.000292547	hypothetical protein	no homolog
AAEL005205-RA	0.634406	0.00353732	conserved hypothetical protein	FBgn0052638	CG32638
AAEL008250-RA	0.63433	0.00135026	conserved hypothetical protein	FBgn0035896	CG6983
AAEL009918-RA	0.633968	0.00313722	conserved hypothetical protein	FBgn0001990	wek
AAEL008867-RA	0.633804	6.49e-05	hypothetical protein	no homolog
AAEL006063-RA	0.633764	0.000538944	U3 small nucleolar ribonucleoprotein protein imp4	FBgn0039274	CG11920
AAEL011307-RA	0.633367	0.00549916	RAD51C protein, putative	FBgn0003482	spn-D
AAEL002240-RA	0.63334	0.000966802	signal transducing adapter molecule (stam)	FBgn0027363	Stam
AAEL003375-RA	0.633204	0.000458681	conserved hypothetical protein	FBgn0037265	CG12001
AAEL009701-RA	0.633191	0.000355888	conserved hypothetical protein	FBgn0026778	Rad1
AAEL009799-RA	0.633145	0.00023297	hypothetical protein	no homolog
AAEL006548-RA	0.633026	0.00083608	hypothetical protein	no homolog
AAEL007996-RA	0.632991	0.000341906	centaurin alpha	no homolog
AAEL008126-RA	0.632866	0.000157674	GPCR Latrophilin Family [Source:Aedes_ManualAnnotation;Acc:AAEL800761]	FBgn0033313	Cirl
AAEL007310-RA	0.632832	0.000603436	conserved hypothetical protein	FBgn0039187	CG6454
AAEL007875-RB	0.632814	0.000193673	hypothetical protein	no homolog
AAEL000499-RA	0.632746	0.0072233	Spaetzle-like cytokine. [Source:Aedes_ManualAnnotation;Acc:AAEL800588]	FBgn0003495	spz
AAEL010637-RA	0.632618	0.000399089	zinc finger protein, putative	FBgn0051388	CG31388
AAEL001789-RA	0.632435	0.000565916	hypothetical protein	FBgn0035065	CG3589
AAEL011669-RA	0.632288	0.00196189	hypothetical protein	no homolog
AAEL008575-RA	0.632256	0.0019144	regulator of chromosome condensation	FBgn0031769	CG9135
AAEL005100-RA	0.632161	0.00180106	hypothetical protein	no homolog
AAEL011953-RA	0.632156	0.000353084	oxysterol binding protein 9,	FBgn0033463	CG1513
AAEL003278-RA	0.632123	0.000298741	hypothetical protein	FBgn0039048	CG17111
AAEL010357-RA	0.631986	0.000260891	hypothetical protein	FBgn0036374	CG17689
AAEL000292-RA	0.631964	0.000950052	conserved hypothetical protein	no homolog
AAEL009418-RA	0.631868	0.000128503	conserved hypothetical protein	FBgn0052803	CG32803
AAEL013065-RA	0.631842	9.81e-05	thiamin pyrophosphokinase	FBgn0039958	CG12567
AAEL013261-RA	0.631814	0.00215453	conserved hypothetical protein	no homolog
AAEL015080-RA	0.631515	0.000205039	conserved hypothetical protein	FBgn0026143	CDC45L
AAEL000577-RA	0.631386	0.00073196	DNA binding protein elf-1	FBgn0004586
AAEL000767-RB	0.631288	0.000183916	phospholipid-transporting ATPase 1 (aminophospholipid flippase 1)	FBgn0033837
AAEL007896-RA	0.631029	0.00149341	hypothetical protein	no homolog
AAEL011705-RA	0.631012	0.00155729	conserved hypothetical protein	no homolog
AAEL007034-RA	0.630964	0.000269697	conserved hypothetical protein	FBgn0027654	jdp
AAEL010089-RA	0.630908	4.58e-05	conserved hypothetical protein	FBgn0038590	CG12320
AAEL010177-RA	0.630709	0.00155686	conserved hypothetical protein	FBgn0054039	CG34039
AAEL011516-RA	0.630558	0.000486133	conserved hypothetical protein	FBgn0038366	CG4576
AAEL004420-RC	0.630338	0.00150354	conserved hypothetical protein	FBgn0023520	CG3857
AAEL007338-RA	0.630274	0.000270452	hypothetical protein	no homolog
AAEL009356-RA	0.630219	0.00357949	conserved hypothetical protein	FBgn0035337	CG15877
AAEL013099-RA	0.630151	0.000603436	hypothetical protein	no homolog
AAEL006632-RB	0.629881	0.000374074	conserved hypothetical protein	FBgn0050193
AAEL007939-RA	0.629803	0.000389465	conserved hypothetical protein	FBgn0026143	CDC45L
AAEL006970-RA	0.629793	0.00627213	lipase	FBgn0032289	CG6431
AAEL005473-RA	0.62966	0.000575701	conserved hypothetical protein	FBgn0034308	CG10915
AAEL010246-RA	0.629186	0.00134759	conserved hypothetical protein	FBgn0039210	CG13625
AAEL013384-RA	0.629081	0.00158536	conserved hypothetical protein	FBgn0035283	CG12024
AAEL010121-RA	0.628763	0.000476066	hypothetical protein	FBgn0036302	sowah
AAEL000660-RA	0.628515	0.00142544	peptide methionine sulfoxide reductase, putative	FBgn0000565	Eip71CD
AAEL014286-RA	0.628427	0.00336811		FBgn0002914	Myb
AAEL014497-RA	0.628263	2.59e-05	hypothetical protein	no homolog
AAEL000785-RA	0.627853	0.000120327	conserved hypothetical protein	FBgn0034086	CG8441
AAEL012913-RA	0.627593	0.000351565	conserved hypothetical protein	no homolog
AAEL010553-RA	0.627311	6.89e-05	conserved hypothetical protein	FBgn0024222	ird5
AAEL006189-RA	0.627172	0.000295915	conserved hypothetical protein	FBgn0031478	CG8814
AAEL004002-RA	0.627111	0.00230241	glucose dehydrogenase	FBgn0030591	CG9517
AAEL010245-RC	0.627006	0.000592174	chloride channel, putative	FBgn0029079	icln
AAEL002905-RA	0.626916	0.000259415	conserved hypothetical protein	FBgn0052803	CG32803
AAEL014814-RA	0.626878	0.0033522	conserved hypothetical protein	no homolog
AAEL002628-RA	0.626752	4.52e-05	hypothetical protein	no homolog
AAEL013534-RA	0.626477	8.41e-05	tgf-beta resistance-associated protein trag	FBgn0023510	Rbcn-3B
AAEL005478-RA	0.626306	0.00233242	flavohemoprotein B5/b5r	FBgn0034442	CG11257
AAEL005445-RA	0.625827	0.000107363	hypothetical protein	no homolog
AAEL007908-RA	0.625705	0.000461346	nicotinamide mononucleotide adenylyltransferase	FBgn0039254	Nmnat
AAEL001491-RA	0.625693	0.0044738	conserved hypothetical protein	FBgn0032119	CG3769
AAEL004318-RB	0.625692	0.00230865	hypothetical protein	no homolog
AAEL013151-RA	0.625613	5.02e-05	orf protein	FBgn0032248	CG5343
AAEL003476-RA	0.625231	0.00473859	calpain-c	FBgn0030741
AAEL010261-RA	0.625198	0.000816493	hypothetical protein	FBgn0033627	CG13204
AAEL005893-RA	0.625181	9.67e-05	hypothetical protein	FBgn0033846	mip120
AAEL010782-RA	0.624888	0.00618033	carboxypeptidase	FBgn0032144	CG17633
AAEL011631-RA	0.624834	0.00606481	hypothetical protein	FBgn0033718	ana3
AAEL006392-RA	0.624723	0.000271686	hypothetical protein	FBgn0031071
AAEL001463-RA	0.624588	0.000522241	conserved hypothetical protein	FBgn0050441	CG30441
AAEL008673-RA	0.624562	0.000133385	ras-related protein Rab-9, putative	FBgn0032782	Rab9
AAEL010933-RA	0.624282	0.000247411	hypothetical protein	FBgn0029907	Atx-1
AAEL011812-RA	0.624185	0.00025787	gonadotropin inducible transcription factor	no homolog
AAEL000403-RA	0.623901	0.000270694	conserved hypothetical protein	FBgn0051320	CG31320
AAEL001976-RA	0.623898	0.000121541	cAMP-dependent protein kinase catalytic subunit	FBgn0039796	CG12069
AAEL010260-RA	0.623787	0.0031452	conserved hypothetical protein	FBgn0032021	CG7781
AAEL007206-RA	0.623411	0.00353392	hypothetical protein	FBgn0015801	Reg-5
AAEL015127-RA	0.623083	0.000547083	hypothetical protein	no homolog
AAEL007960-RA	0.622992	0.00696817	hypothetical protein	no homolog
AAEL006208-RA	0.622823	0.000147073	conserved hypothetical protein	FBgn0037814	CG6325
AAEL013814-RA	0.622819	0.00044745	phosphomevalonate kinase, putative	FBgn0032811	CG10268
AAEL004420-RB	0.622811	0.00136752	conserved hypothetical protein	FBgn0023520	CG3857
AAEL011436-RA	0.622787	0.000235895	myosin xv	FBgn0030252	Myo10A
AAEL007149-RA	0.622723	0.000295169	conserved hypothetical protein	FBgn0023534	CG17778
AAEL002284-RA	0.622702	0.000238573	mediator complex, subunit, putative	FBgn0026873	MED18
AAEL013283-RA	0.622681	0.000348707	serine-type enodpeptidase,	FBgn0036264	CG11529
AAEL011356-RA	0.62232	0.000147073	alcohol dehydrogenase	no homolog
AAEL003968-RA	0.622181	0.000741343	helicase	FBgn0011604	Iswi
AAEL013725-RA	0.621639	0.000104462	conserved hypothetical protein	FBgn0037792	CG6241
AAEL007564-RA	0.621513	0.000978428	zinc finger protein	FBgn0031610	CG15436
AAEL006298-RA	0.621481	0.000192458	conserved hypothetical protein	FBgn0051111	CG31111
AAEL000233-RB	0.621349	0.000268744	membrane-associated guanylate kinase, putative	no homolog
AAEL011589-RA	0.621156	0.000284653	hypothetical protein	no homolog
AAEL000974-RA	0.620979	0.000607163	zinc finger protein	FBgn0033449	CG1663
AAEL013579-RA	0.620963	0.00101017	hypothetical protein	no homolog
AAEL009574-RA	0.620621	0.000990812	elongase, putative	FBgn0051523	CG31523
AAEL001670-RA	0.620592	0.000720037	conserved hypothetical protein	FBgn0033675
AAEL007053-RB	0.620119	0.000133385	hypothetical protein	no homolog
AAEL008165-RA	0.620072	0.00125727	conserved hypothetical protein	FBgn0042102	CG18745
AAEL011956-RA	0.619442	0.00010107	conserved hypothetical protein	FBgn0053558	CG33558
AAEL004194-RA	0.619326	0.00375363	bcl2/adenovirus E1b 19-kda protein-interacting protein	FBgn0035488	CG11593
AAEL007894-RA	0.619175	0.00186632	hypothetical protein	no homolog
AAEL014411-RA	0.619135	0.000581452	cytochrome P450 [Source:Aedes_ManualAnnotation;Acc:AAEL800250]	FBgn0038095	Cyp304a1
AAEL015099-RD	0.618794	0.000108673	sumo ligase	FBgn0003612	Su(var)2-10
AAEL004061-RA	0.618703	0.00826802	acetylcholine receptor protein alpha 1, 2, 3, 4 invertebrate	FBgn0015519	nAcRalpha-7E
AAEL014696-RA	0.618684	0.00304566	hypothetical protein	no homolog
AAEL010898-RA	0.61842	0.000395912	conserved hypothetical protein	FBgn0030870	CG6398
AAEL004318-RA	0.618253	0.00180167	hypothetical protein	no homolog
AAEL013329-RA	0.618213	8.78e-05	cdk1	FBgn0004107	cdc2c
AAEL006245-RA	0.618184	0.000125185	insulin receptor tyrosine kinase substrate	FBgn0052082	CG32082
AAEL007634-RA	0.618004	0.000621397	conserved hypothetical protein	FBgn0051460	CG31460
AAEL013085-RA	0.617859	0.00023721	hypothetical protein	FBgn0025874	Meics
AAEL008179-RA	0.617815	0.000122586	RAS homologue enriched in brain (RHEB)	FBgn0041191	Rheb
AAEL009402-RA	0.617674	0.00345789	map kinase-activated protein kinase (mapkapk)	FBgn0013987	MAPk-Ak2
AAEL007207-RA	0.617474	0.000486133	conserved hypothetical protein	FBgn0015801	Reg-5
AAEL011236-RA	0.617321	0.000484093	hypothetical protein	no homolog
AAEL006963-RA	0.616683	4.37e-05	conserved hypothetical protein	FBgn0031655	Marcal1
AAEL000899-RA	0.616422	0.000326255	glycosyltransferase	FBgn0035002	CG3419
AAEL001556-RA	0.616231	0.00067747	conserved hypothetical protein	no homolog
AAEL010407-RA	0.616199	0.000209196	conserved hypothetical protein	FBgn0037235	CG1103
AAEL008264-RA	0.616141	0.00402246	conserved hypothetical protein	FBgn0040342	CG3706
AAEL014575-RA	0.615882	0.00119417	p15-2a protein, putative	FBgn0028411	Nxt1
AAEL006553-RA	0.615556	0.000869627	protein disulfide isomerase, putative	FBgn0036579	CG5027
AAEL009759-RA	0.615118	0.000121079	conserved hypothetical protein	FBgn0050109	CG30109
AAEL003338-RA	0.614922	0.000233502	hypothetical protein	no homolog
AAEL006296-RA	0.614661	0.0010256	conserved hypothetical protein	no homolog
AAEL013912-RA	0.614645	0.0081019	conserved hypothetical protein	FBgn0023550	CG18031
AAEL004642-RA	0.614612	0.00389066	hypothetical protein	no homolog
AAEL002258-RA	0.614595	0.000156076	conserved hypothetical protein	FBgn0043796	CG12219
AAEL015307-RA	0.613853	0.000327953	hypothetical protein	FBgn0051051	CG31051
AAEL003783-RA	0.613765	9.1e-05	hypothetical protein	no homolog
AAEL002522-RA	0.61376	0.00136326	adenosine deaminase acting on RNA (adar)-2	FBgn0026086	Adar
AAEL011423-RA	0.613697	0.00207378	sugar transporter	FBgn0034909	CG4797
AAEL012498-RA	0.613526	0.000615092	conserved hypothetical protein	FBgn0036628	CG13035
AAEL008071-RA	0.613502	0.000222775	apsB, putative	FBgn0036614	CG4925
AAEL008112-RA	0.613475	0.000253125	conserved hypothetical protein	FBgn0051755	CG31755
AAEL014021-RA	0.613299	0.000972169	mediator complex, 155kD-subunit, putative	FBgn0034795	MED23
AAEL007321-RA	0.612966	0.000499956	conserved hypothetical protein	FBgn0033199	CG17985
AAEL001600-RA	0.612741	0.000641192	conserved hypothetical protein	no homolog
AAEL007313-RA	0.612664	0.00182619	conserved hypothetical protein	FBgn0033229	CG12822
AAEL013889-RA	0.612402	0.000485002	conserved hypothetical protein	no homolog
AAEL005028-RA	0.612319	3.53e-05	conserved hypothetical protein	no homolog
AAEL012339-RB	0.612293	8.76e-05	cdk1	FBgn0004107	cdc2c
AAEL004624-RA	0.611565	0.00034622	hypothetical protein	no homolog
AAEL008853-RB	0.611525	0.000535069	choline/ethanolamine kinase	FBgn0032955	CG2201
AAEL008896-RA	0.611438	0.000428038	hypothetical protein	no homolog
AAEL012187-RA	0.611326	0.000297041	lethal(3)malignant brain tumor	FBgn0002441	l(3)mbt
AAEL012462-RA	0.61127	0.000336696	conserved hypothetical protein	FBgn0085430	CG34401
AAEL001600-RB	0.611056	0.000164274	conserved hypothetical protein	no homolog
AAEL010722-RA	0.61059	3.16e-05	hypothetical protein	no homolog
AAEL008023-RA	0.610317	0.000627893	cytochrome P450 [Source:Aedes_ManualAnnotation;Acc:AAEL800298]	FBgn0015032	Cyp4c3
AAEL008429-RA	0.609796	0.000297041	RP58 protein, putative	no homolog
AAEL013479-RA	0.609784	0.00284899	conserved hypothetical protein	FBgn0085258
AAEL011313-RA	0.609546	0.000538944	epoxide hydrolase	FBgn0010053	Jheh1
AAEL011626-RA	0.609139	0.00175368	DNA cross-link repair protein pso2/snm1	FBgn0037338	Snm1
AAEL004401-RA	0.609088	0.000499956	Heme Peroxidase. [Source:Aedes_ManualAnnotation;Acc:AAEL800506]	no homolog
AAEL004351-RC	0.609024	0.000916898	casein kinase	FBgn0011253
AAEL000149-RA	0.609009	0.000898482	sap30	FBgn0030788	Sap30
AAEL006230-RA	0.608832	0.000718944	gonadotropin inducible transcription factor	FBgn0036522	CG7372
AAEL012220-RA	0.608467	0.000531297	hypothetical protein	no homolog
AAEL007074-RA	0.608389	0.000689769	hypothetical protein	no homolog
AAEL004417-RA	0.608228	6.12e-05	conserved hypothetical protein	FBgn0033812	CG4663
AAEL004385-RA	0.607837	4.35e-05	UGA suppressor tRNA-associated antigenic protein, putative	FBgn0037347	CG1427
AAEL006865-RA	0.607463	0.000916898	conserved hypothetical protein	no homolog
AAEL004420-RA	0.607325	0.00133603	conserved hypothetical protein	FBgn0023520	CG3857
AAEL000860-RA	0.607146	0.000237536	conserved hypothetical protein	FBgn0004055	uzip
AAEL007013-RA	0.606833	0.000295169	RNA-binding protein precursor, putative	FBgn0035016	CG4612
AAEL014439-RA	0.606737	0.00182619	juvenile hormone-inducible protein, putative	FBgn0051436	CG31436
AAEL002241-RA	0.606604	0.00334488	cuticle protein, putative	FBgn0031942	CG7203
AAEL006533-RA	0.606226	0.00182988	Ets domain-containing protein	FBgn0005660	Ets21C
AAEL014181-RA	0.606192	0.00464681		FBgn0032673	CG7180
AAEL010500-RA	0.606121	0.00962159	glutathione transferase [Source:Aedes_ManualAnnotation;Acc:AAEL800414]	no homolog
AAEL001773-RA	0.605483	0.00141177	conserved hypothetical protein	FBgn0035065	CG3589
AAEL004187-RA	0.605474	0.00599871	conserved hypothetical protein	no homolog
AAEL007045-RA	0.605441	0.00235565	conserved hypothetical protein	FBgn0036800
AAEL002442-RA	0.605353	0.000455069	conserved hypothetical protein	FBgn0036423	CG3919
AAEL007048-RA	0.605003	0.000367401	hypothetical protein	no homolog
AAEL000949-RA	0.604761	8.35e-05	conserved hypothetical protein	FBgn0050389	CG30389
AAEL001449-RA	0.604234	6.03e-05	conserved hypothetical protein	FBgn0032150	CG13123
AAEL002486-RA	0.603913	0.000755882	mitochondrial inner membrane protein translocase, 9kD-subunit, putative	FBgn0027358	Tim9b
AAEL005171-RA	0.60389	0.003044	conserved hypothetical protein	FBgn0037777	CG11722
AAEL015005-RA	0.603876	0.000207124	hypothetical protein	no homolog
AAEL014267-RA	0.603691	0.00165693	conserved hypothetical protein	FBgn0039540	CG12879
AAEL012082-RA	0.602775	0.000888303	NF-180, putative	FBgn0085411	CG34382
AAEL005745-RA	0.602709	0.00961074	neurokinin-3 receptor, putative	FBgn0053696	CG33696
AAEL000054-RA	0.60228	0.000369635	mixed-lineage leukemia protein, mll	FBgn0003862	trx
AAEL013105-RA	0.602226	0.00265213	receptor protein tyrosine phosphatase	FBgn0004369	Ptp99A
AAEL000502-RA	0.601485	0.00014343	NADPH FAD oxidoreductase	FBgn0038429	CG14882
AAEL014347-RA	0.601344	0.00142486	conserved hypothetical protein	FBgn0031981	CG7466
AAEL012197-RA	0.601197	0.00128681	conserved hypothetical protein	FBgn0036192	CG14133
AAEL011950-RA	0.601096	7.66e-05	conserved hypothetical protein	FBgn0050157	CG30157
AAEL010932-RA	0.601031	0.000160807	RNAse h (70)	FBgn0024988
AAEL013110-RA	0.600642	0.000519942	conserved hypothetical protein	FBgn0023515	CG14814
AAEL006360-RA	0.600563	7.33e-05	conserved hypothetical protein	FBgn0036937	Ir76b
AAEL007652-RA	0.600063	0.000222054	conserved hypothetical protein	no homolog
AAEL005343-RA	0.59999	3.1e-05	dystrobrevin	FBgn0033739	Dyb
AAEL007464-RA	0.599911	0.000354593	hypothetical protein	no homolog
AAEL005915-RA	0.599848	0.000297041	monocarboxylate transporter	no homolog
AAEL011069-RA	0.599705	0.000132215	conserved hypothetical protein	FBgn0026238	gus
AAEL007296-RA	0.599664	0.00429559	conserved hypothetical protein	FBgn0034142	CG8306
AAEL014520-RA	0.59947	0.00556043	follistatin	FBgn0052354	CG32354
AAEL008798-RA	0.599305	0.00203538	conserved hypothetical protein	no homolog
AAEL014211-RA	0.598181	0.000253939	conserved hypothetical protein	no homolog
AAEL000642-RA	0.598096	0.00170789	alpha-amylase	FBgn0033296	CG11669
AAEL009090-RA	0.597951	0.00351599	conserved hypothetical protein	FBgn0037713	CG16790
AAEL000991-RA	0.59769	6.03e-05	conserved hypothetical protein	no homolog
AAEL010298-RA	0.597656	0.00241673	conserved hypothetical protein	FBgn0000439	Dfd
AAEL014263-RA	0.597524	0.000497082	hypothetical protein	no homolog
AAEL013288-RB	0.597366	0.000791809	conserved hypothetical protein	FBgn0038533	CG7523
AAEL007618-RA	0.596983	0.00117685	conserved hypothetical protein	no homolog
AAEL009206-RA	0.59632	0.000539678	organic cation transporter	FBgn0037144	CG7458
AAEL001651-RA	0.595664	0.000120327	conserved hypothetical protein	FBgn0032688	CG15160
AAEL010126-RA	0.595503	0.000969805	zinc finger protein	FBgn0040765	luna
AAEL012747-RA	0.595401	0.000119157	conserved hypothetical protein	FBgn0036518	RhoGAP71E
AAEL002287-RA	0.595078	0.000616357	trans-prenyltransferase	FBgn0051005	CG31005
AAEL009149-RA	0.594668	0.000391403	kinectin, putative	FBgn0037581	CG7352
AAEL014701-RA	0.594606	0.000283474	conserved hypothetical protein	FBgn0030034	CG10555
AAEL009825-RA	0.594429	0.0026414	60S ribosomal protein L13a	FBgn0037351	RpL13A
AAEL011159-RA	0.594208	0.00475168	cartilage associated protein	no homolog
AAEL013295-RA	0.594048	0.000166026	conserved hypothetical protein	FBgn0038533	CG7523
AAEL013306-RA	0.594033	0.00174187	hypothetical protein	no homolog
AAEL014264-RA	0.593922	0.00761842	conserved hypothetical protein	no homolog
AAEL011856-RA	0.593841	0.0039594	hypothetical protein	no homolog
AAEL003307-RA	0.592923	0.00400283	receptor protein tyrosine phosphatase fragment, arthropod	FBgn0032673	CG7180
AAEL010811-RA	0.592214	0.000211811	hypothetical protein	no homolog
AAEL013877-RD	0.591995	0.000559468	glucosamine-6-phosphate isomerase	FBgn0031717	Oscillin
AAEL006328-RA	0.591951	0.00184166	conserved hypothetical protein	no homolog
AAEL005696-RA	0.591928	0.000874117	cytochrome P450 [Source:Aedes_ManualAnnotation;Acc:AAEL800286]	FBgn0038076	Cyp313a4
AAEL009774-RA	0.591821	0.000262146	hypothetical protein	no homolog
AAEL011439-RA	0.591598	0.00275167	paramyosin, putative	FBgn0037162	CG11449
AAEL012659-RA	0.590932	0.000169462	protein serine/threonine kinase, putative	FBgn0000826	png
AAEL011466-RA	0.590687	0.00111724	conserved hypothetical protein	FBgn0036192	CG14133
AAEL008883-RA	0.590427	0.000129679	conserved hypothetical protein	FBgn0042132	CG18809
AAEL011472-RA	0.590371	0.000295915	hypothetical protein	no homolog
AAEL013729-RA	0.590305	0.000152997	myotonin-protein kinase	FBgn0023081	gek
[truncated: 725 more rows]
